# Supplementary material for: Study on the Design, Synthesis, Bioactivity and Translocation of the Conjugates of Phenazine-1-carboxylic Acid and N-Phenyl Alanine Ester
Source: MDPI journal article supplement (doi:10.3390/molecules29081780), 2024-04-14
Supplement: s1 [file s1]

## Supporting Information

# Study on the Design, Synthesis, Bioactivity and Translocation of the Conjugates of Phenazine-1-carboxylic Acid and *N*-Phenyl Alanine Ester

Yiran Wu <sup>1,2</sup>, Guoqing Mao <sup>1,2</sup>, Gaoshan Xing <sup>1,2</sup>, Yao Tian <sup>1,2</sup>, Yong Hu <sup>1,2</sup>, Changzhou Liao <sup>1,2</sup>, Li Li <sup>1,2</sup>, Xiang Zhu <sup>1,2,3,\*</sup> and Junkai Li <sup>1,2,\*</sup>

- <sup>1</sup> Engineering Research Center of Ecology and Agricultural Use of Wetland, Ministry of Education, Hubei Key Laboratory of Waterlogging Disaster and Agricultural Use of Wetland, College of Agriculture, Yangtze University, Jingzhou 434025, China; wu18230085332@163.com (Y.W.); maoguoqing1688@163.com (G.M.); xinggaoshan6@163.com (G.X.); yaotien@163.com (Y.T.); yong251li@163.com (Y.H.); liaochangzhou58@163.com (C.L.); bohecha901@sina.com (L.L.)
- <sup>2</sup> Institute of Pesticides, Yangtze University, Jingmi Road 88, Jingzhou 434025, China
- <sup>3</sup> National Key Laboratory of Green Pesticide, Key Laboratory of Green Pesticide and Agricultural Bioengineering, Ministry of Education, Guizhou University, Guiyang 550025, China
- \* Correspondence: xiangzhu1992@yangtzeu.edu.cn (X.Z.); junkaili@sina.com (J.L.)

## Table of Contents

|                                                             |    |
|-------------------------------------------------------------|----|
| 1.The structure and data of target compounds (F1-F16) ..... | 2  |
| 2.The structure and data of target compounds (E1-E16) ..... | 34 |

Compound **F1**,  
*N*-(phenazine-1-carbonyl)-*N*-phenylalanine

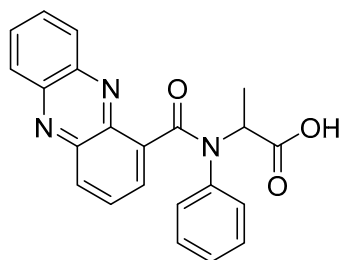

Yellow solid, yield 80.1%, m.p. 130.9-132.1°C;  $^1\text{H}$  NMR (400 MHz,  $\text{DMSO}-d_6$ )  $\delta$  12.93 (s, 1H), 8.34 (dd,  $J = 14.2, 7.2$  Hz, 1H), 8.22 (d,  $J = 8.4$  Hz, 1H), 8.15 – 7.92 (m, 3H), 7.86 – 7.62 (m, 2H), 7.22 (d,  $J = 6.8$  Hz, 2H), 7.05 – 6.70 (m, 3H), 5.15 (1H, two isomers), 1.47 (3H, two isomers).  $^{13}\text{C}$  NMR (101 MHz,  $\text{DMSO}-d_6$ )  $\delta$  173.57, 168.03, 143.19, 142.80, 142.24, 139.90, 137.60, 132.00, 130.53 (2C), 130.26 (2C), 129.96 (2C), 129.73, 128.60, 128.00, 127.35, 124.10 (2C), 66.83, 15.88. HRMS (ESI): calcd for  $\text{C}_{23}\text{H}_{17}\text{N}_3\text{O}_3$   $\{[\text{M}+\text{H}]^+\}$ , 372.1343; found, 372.1345.

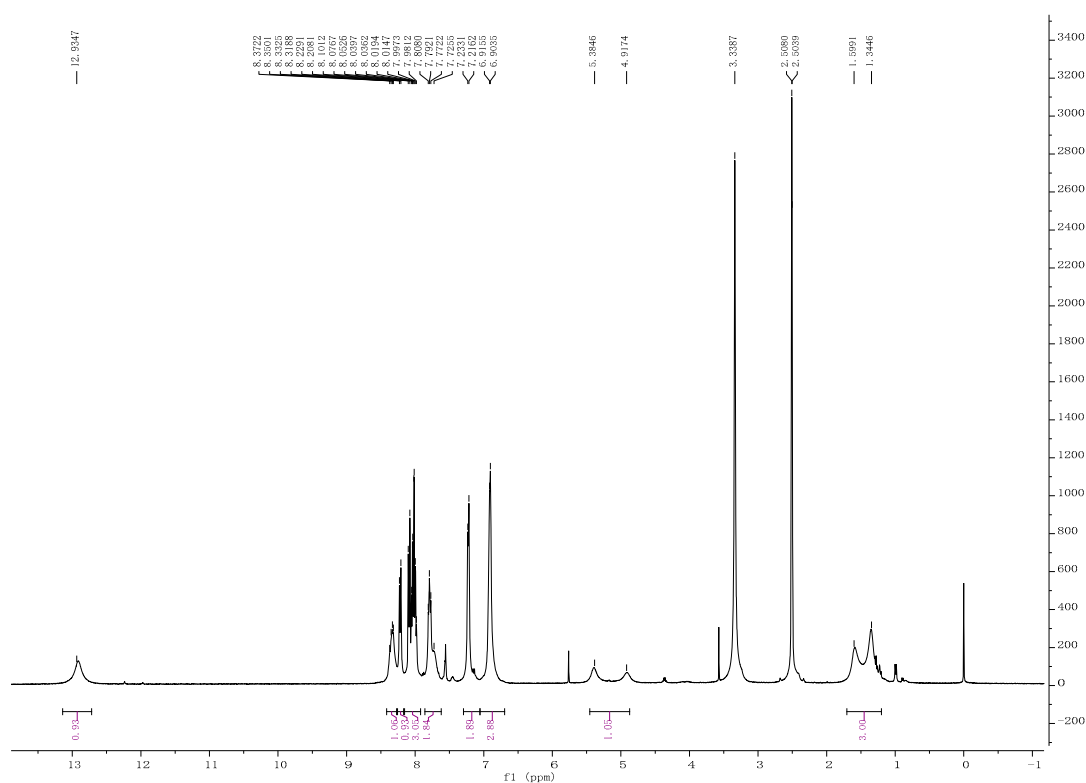

The  $^1\text{H}$  NMR spectrum of compound **F1**

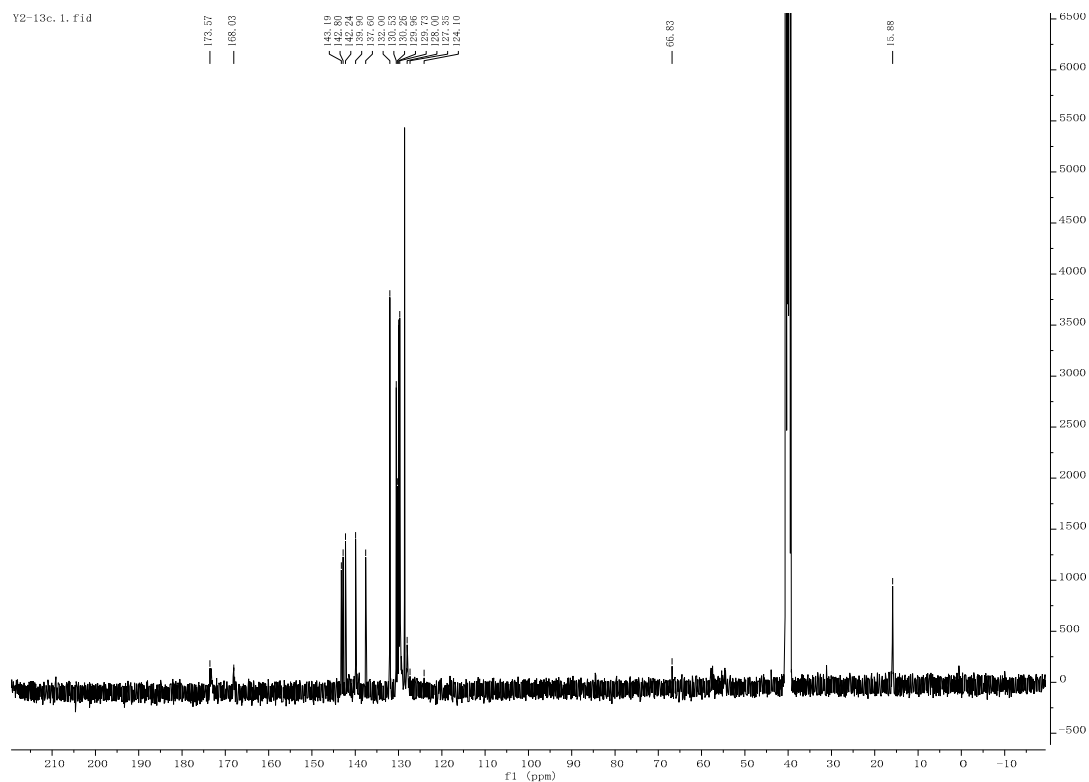

The  $^{13}\text{C}$  NMR spectrogram of compound **F1**

Y1 #96 RT: 0.51 AV: 1 NL: 1.55E10  
T: FTMS + p ESI Full ms [150.0000-1500.0000]

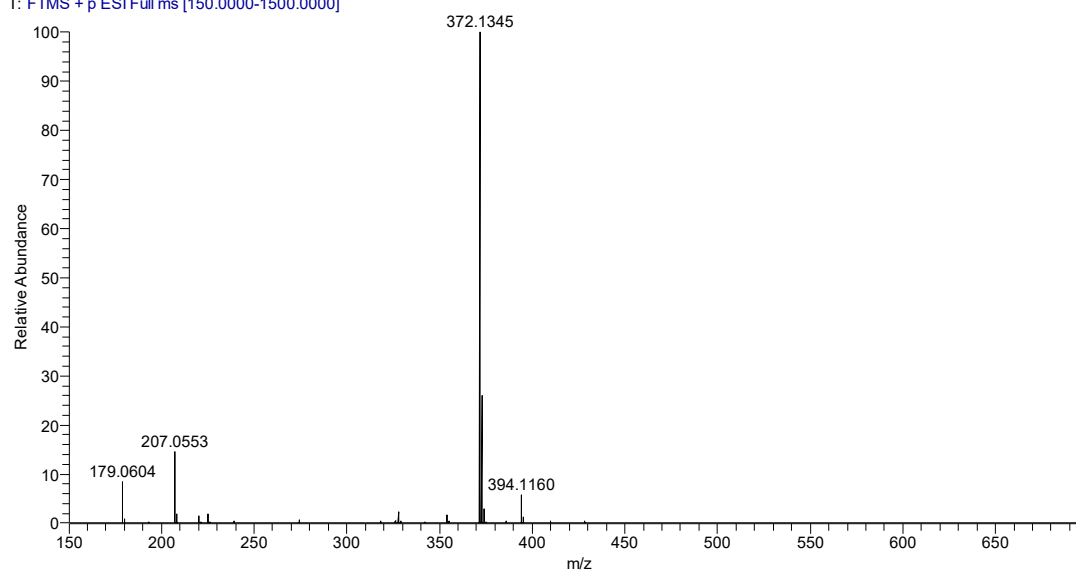

The HRMS spectrogram of compound **F1**

CC(C(=O)Nc1ccccc1F)c1ccccc1C2=CN3C=CC=CC=C3N=C2c4ccccc4

12.983

8.3574  
8.2387  
8.2059  
8.1462  
8.1212  
8.0722  
8.0448  
8.0233  
8.0062  
7.9509  
7.8389  
7.6392  
7.5077  
6.9447  
6.5924  
6.5572

5.3574  
4.981

1.357  
1.3519

1.01

1.09  
1.09  
1.09  
1.09  
1.34

0.96  
0.96  
0.96  
0.96

1.14

3.00

4

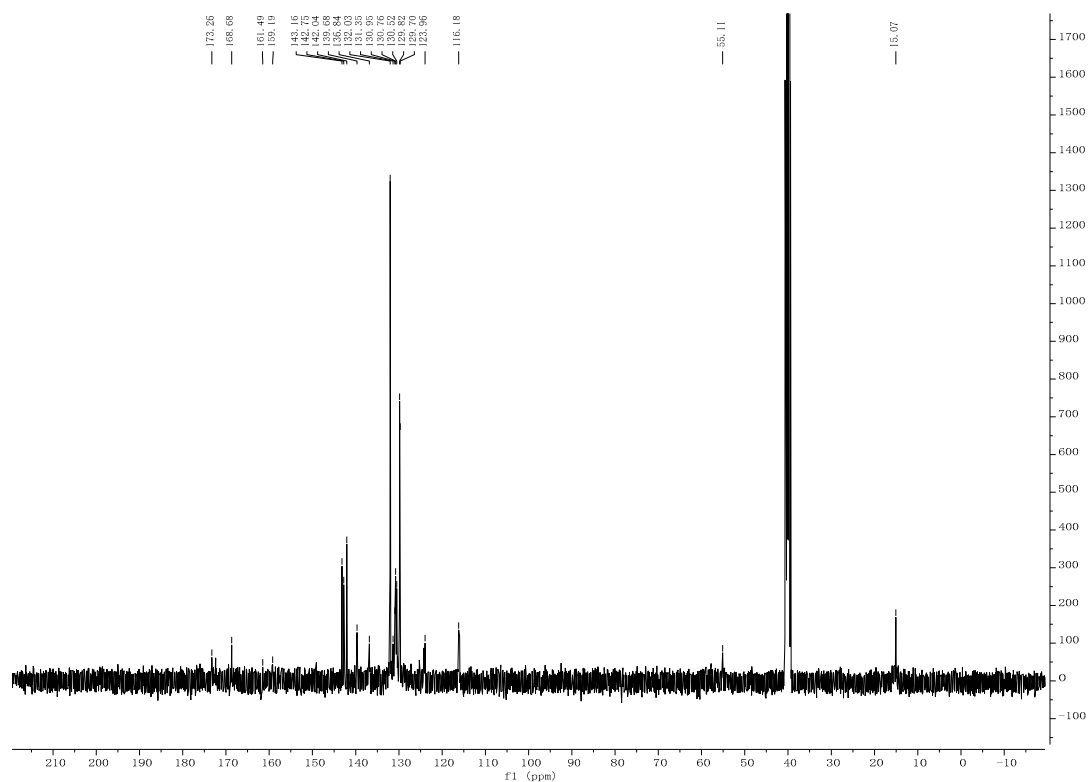

The  $^{13}\text{C}$  NMR spectrogram of compound F2

Y11 #101 RT: 0.54 AV: 1 NL: 7.54E9  
T: FTMS + p ESI Full ms [150.0000-1500.0000]

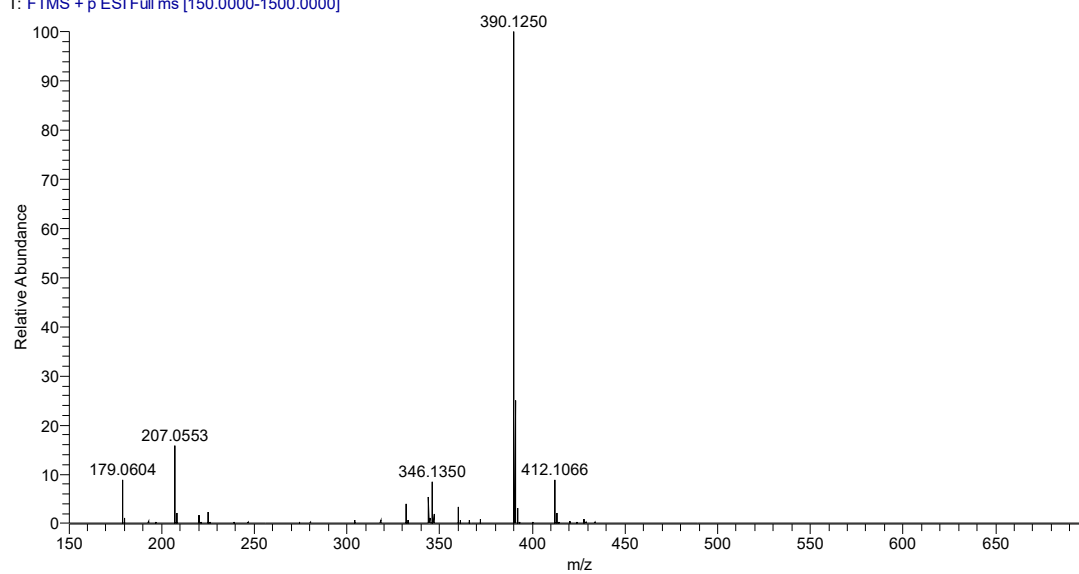

The HRMS spectrogram of compound F2

Compound **F3**,  
*N*-(3-fluorophenyl)-*N*-(phenazine-1-carbonyl)alanine

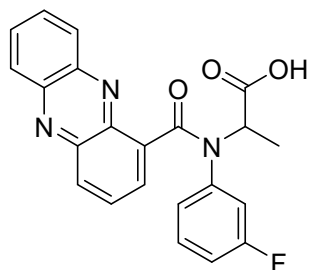

Yellow solid, yield 80.1%, m.p. 106.2-107.1°C;  $^1\text{H}$  NMR (400 MHz,  $\text{DMSO-}d_6$ )  $\delta$  12.96 (s, 1H), 8.33 (dd,  $J = 17.2, 9.4$  Hz, 1H), 8.21 (d,  $J = 8.3$  Hz, 1H), 8.12 (d,  $J = 10.0$  Hz, 1H), 8.05 – 7.97 (m, 2H), 7.93 – 7.70 (m, 2H), 7.12 (s, 1H), 7.02 (d,  $J = 7.8$  Hz, 1H), 6.92 (q,  $J = 7.1$  Hz, 1H), 6.74 (s, 1H), 5.17 (1H, two isomers), 1.47 (3H, two isomers).  $^{13}\text{C}$  NMR (101 MHz,  $\text{DMSO-}d_6$ )  $\delta$  173.16, 168.00, 162.63, 160.19, (dd,  $\text{C}=\text{C}-\text{F}=J = 246.44$  Hz) 143.22, 142.79, 142.21, 139.74, 137.20, 132.09, 130.59 (2C), 130.00 (2C), 129.88 (2C), 129.74 (2C), 126.38, 116.92, 115.15, 57.71, 15.86. HRMS (ESI): calcd for  $\text{C}_{22}\text{H}_{16}\text{FN}_3\text{O}_3$   $\{[\text{M}+\text{H}]^+\}$ , 390.1248; found, 390.1248.

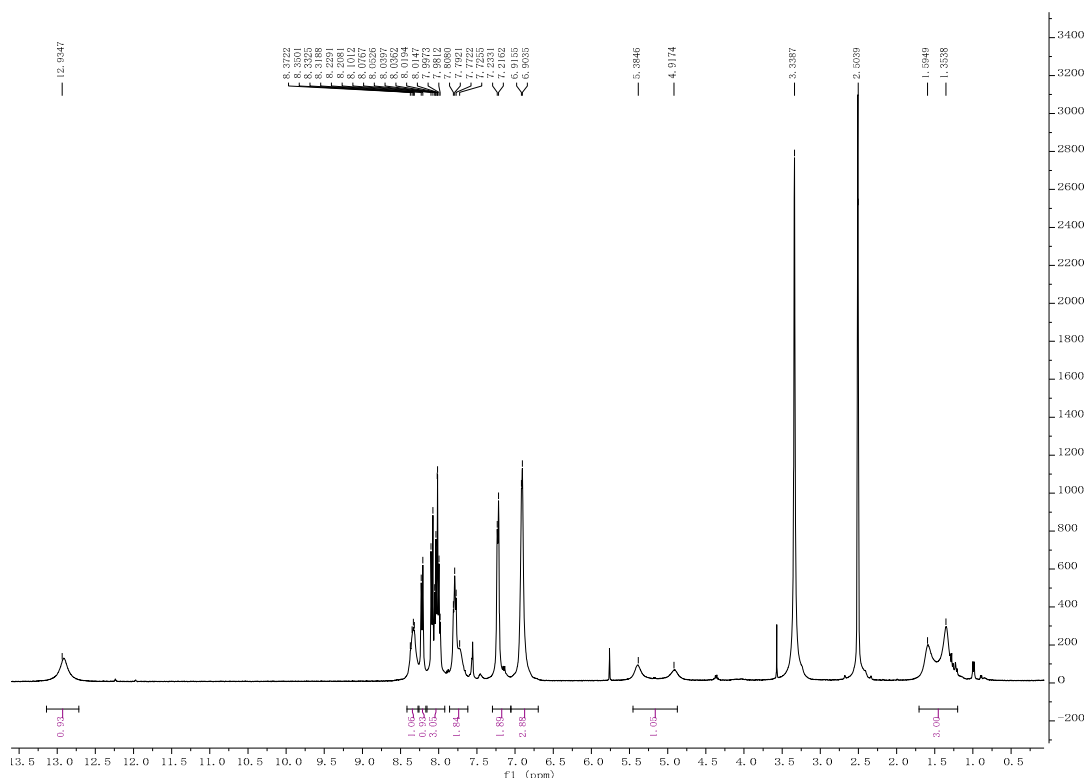

The  $^1\text{H}$  NMR spectrogram of compound **F3**

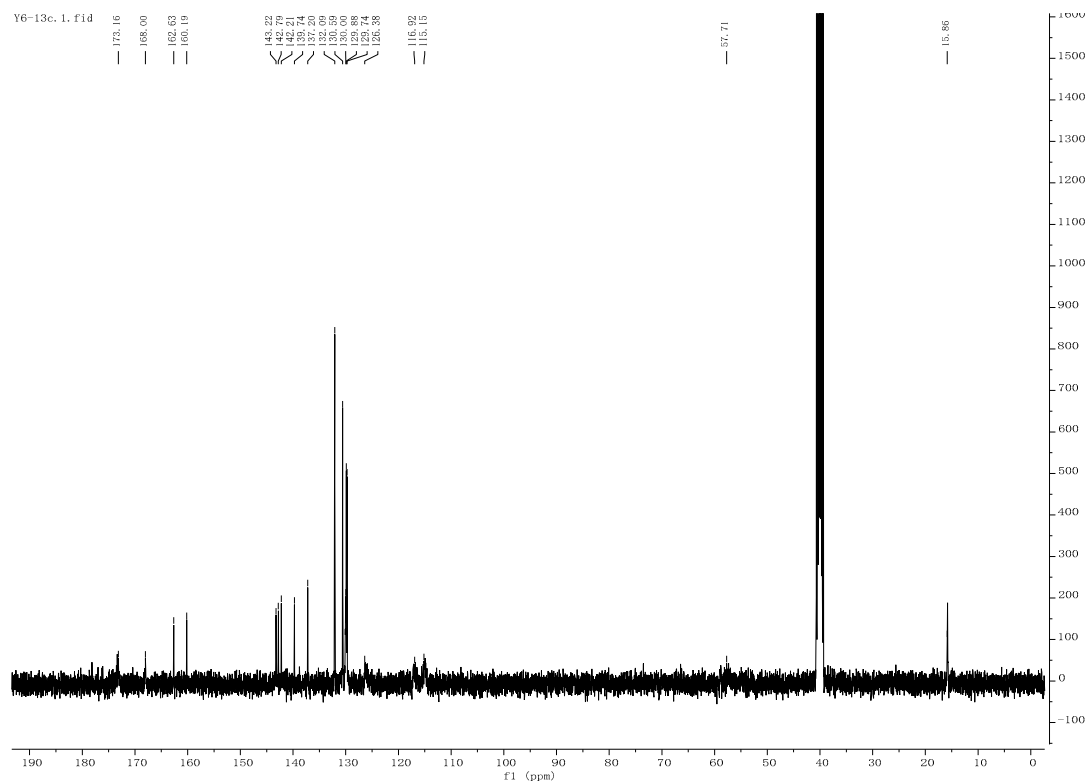

The  $^{13}\text{C}$  NMR spectrogram of compound **F3**

Y6 #94 RT: 0.50 AV: 1 NL: 1.43E10  
T: FTMS + p ESI Full ms [150.0000-1500.0000]

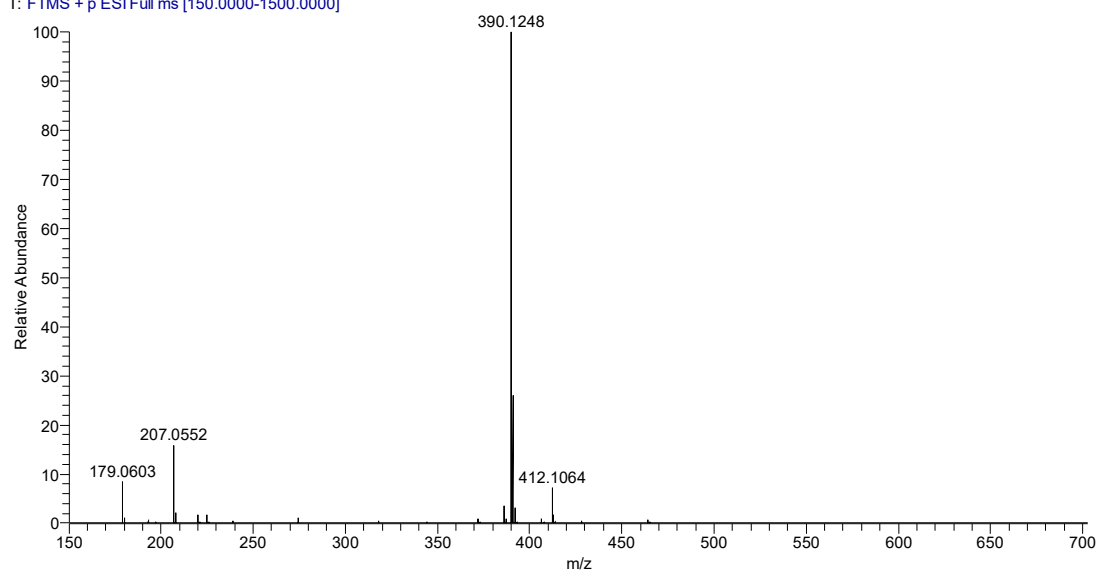

The HRMS spectrogram of compound **F3**

Compound **F4**,  
*N*-(4-fluorophenyl)-*N*-(phenazine-1-carbonyl)alanine

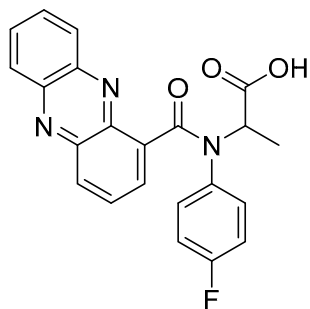

Yellow solid, yield 80.5%, m.p. 80.1-81.4°C;  $^1\text{H}$  NMR (400 MHz,  $\text{DMSO-}d_6$ )  $\delta$  12.97 (s, 1H), 8.39 – 8.27 (m, 1H), 8.26 – 8.18 (m, 1H), 8.12 (d,  $J = 10.1$  Hz, 1H), 8.01 (dddd,  $J = 14.4, 8.1, 6.6, 1.6$  Hz, 2H), 7.81 (dd,  $J = 8.7, 6.6$  Hz, 2H), 7.43 – 7.17 (m, 2H), 6.76 (t,  $J = 8.0$  Hz, 2H), 5.17 (1H, two isomers), 1.45 (3H, two isomers).  $^{13}\text{C}$  NMR (101 MHz,  $\text{DMSO-}d_6$ )  $\delta$  173.14, 168.27, 162.36, 159.91, (dd,  $\text{C}=\text{C}-\text{F} = J = 247.45$  Hz) 143.26, 142.83, 142.25, 139.75, 137.46, 132.04, 130.55, 130.37, 129.95, 129.74, 129.71, 115.50, 115.28, 54.59, 15.88. HRMS (ESI): calcd for  $\text{C}_{22}\text{H}_{16}\text{FN}_3\text{O}_3$   $\{[\text{M}+\text{H}]^+\}$ , 390.1249; found, 390.1252.

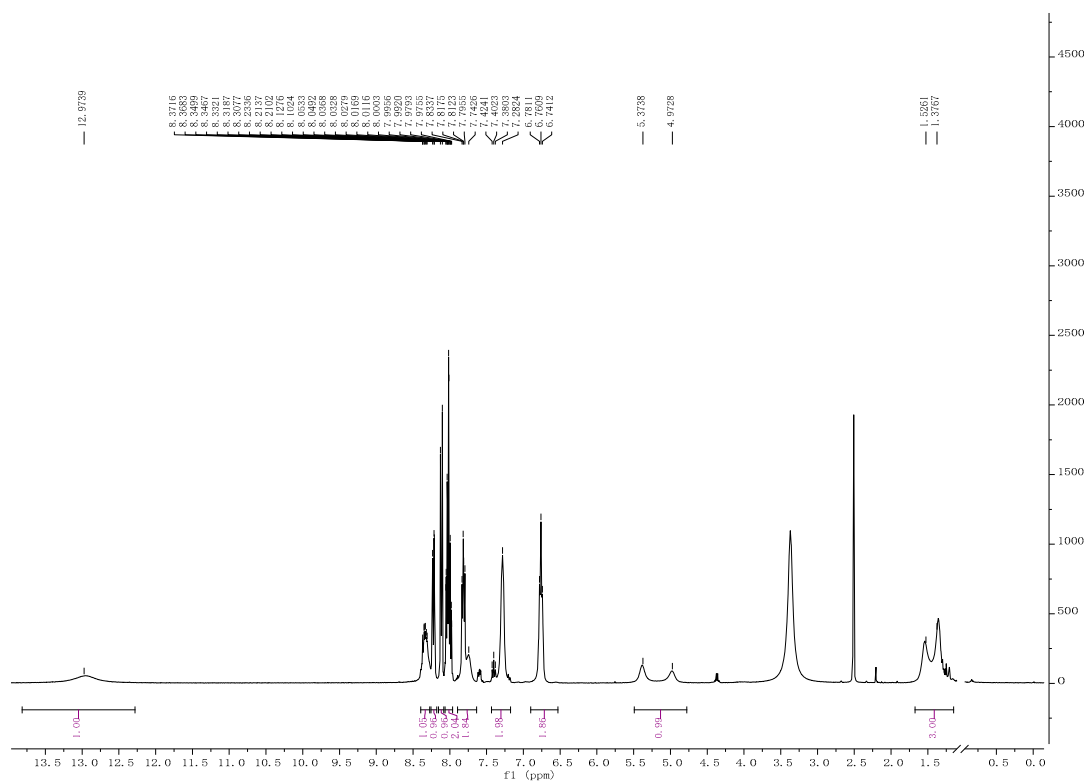

The  $^1\text{H}$  NMR spectrogram of compound **F4**



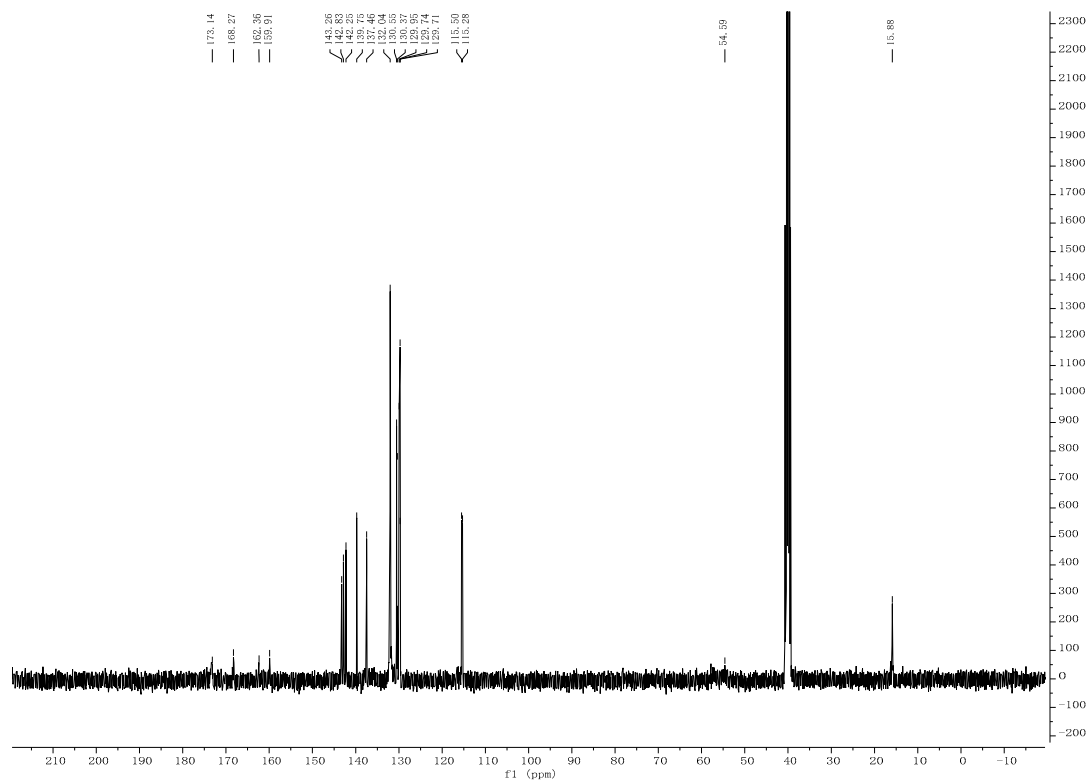

The  $^{13}\text{C}$  NMR spectrogram of compound **F4**

Y14

POS\_Y14 399 (2.268) AM (Cen,4, 80.00, Ar,10000.0,0.00,0.00); Cm (399:406)

1: TOF MS ES+  
8.01e6

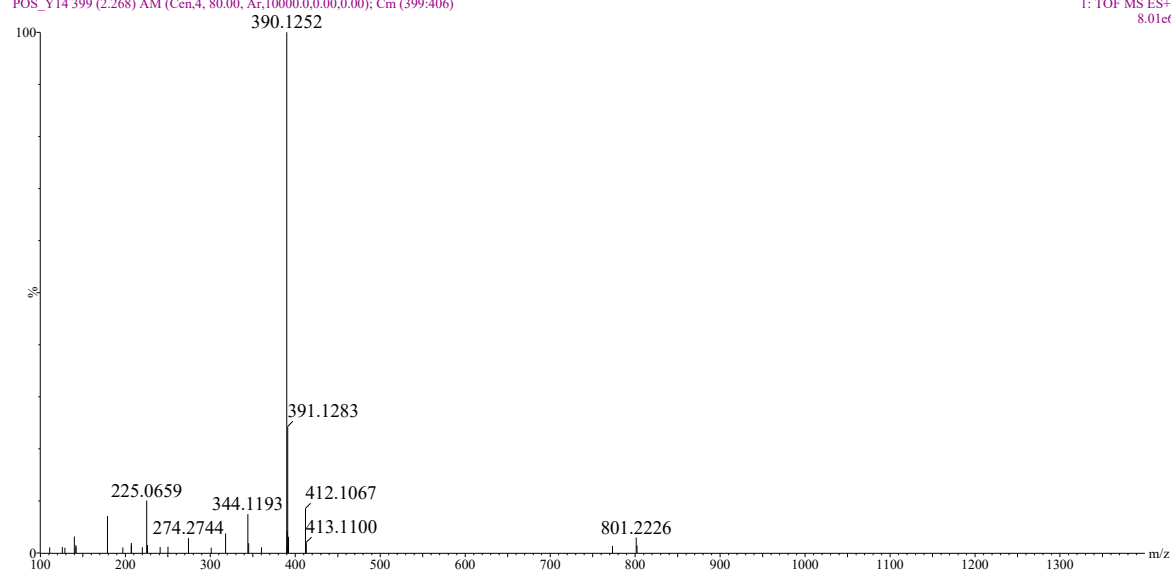

The HRMS spectrogram of compound **F4**

CC(C(=O)N(c1ccccc1Cl)C(=O)c2cc3nc4ccccc4nc3cc2)C(=O)O

Chemical shifts (ppm): 8.3189, 8.3171, 8.2978, 8.2961, 8.1986, 8.1401, 8.1211, 8.1011, 8.0467, 8.0253, 8.0131, 7.9944, 7.9700, 7.9331, 7.9313, 7.9305, 7.8125, 7.7977, 7.7236, 7.7029, 7.6749, 6.9129, 6.8925, 6.8702, 6.7453.

Integrations: 1.07, 1.16, 1.03, 3.56, 1.36, 1.13, 1.05, 2.10, 1.02, 3.00.

**1**

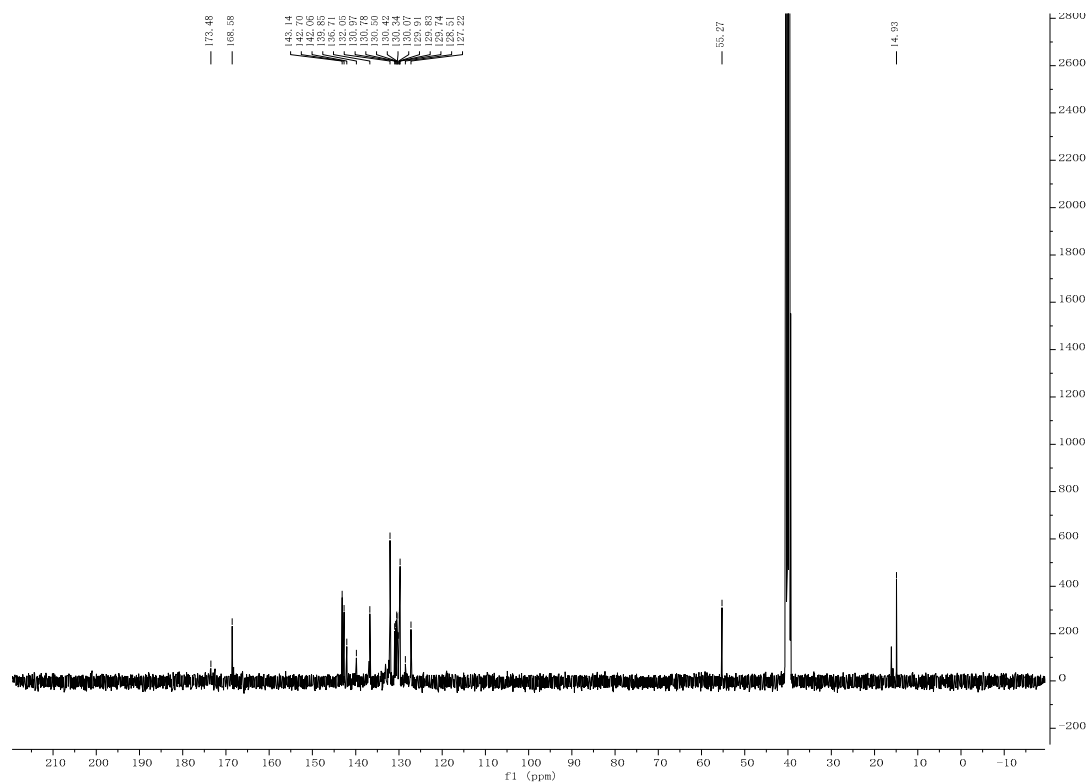

The  $^{13}\text{C}$  NMR spectrogram of compound F5

W10 #94 RT: 0.51 AV: 1 NL: 1.19E10  
T: FTMS + p ESI Full ms [150.0000-1500.0000]

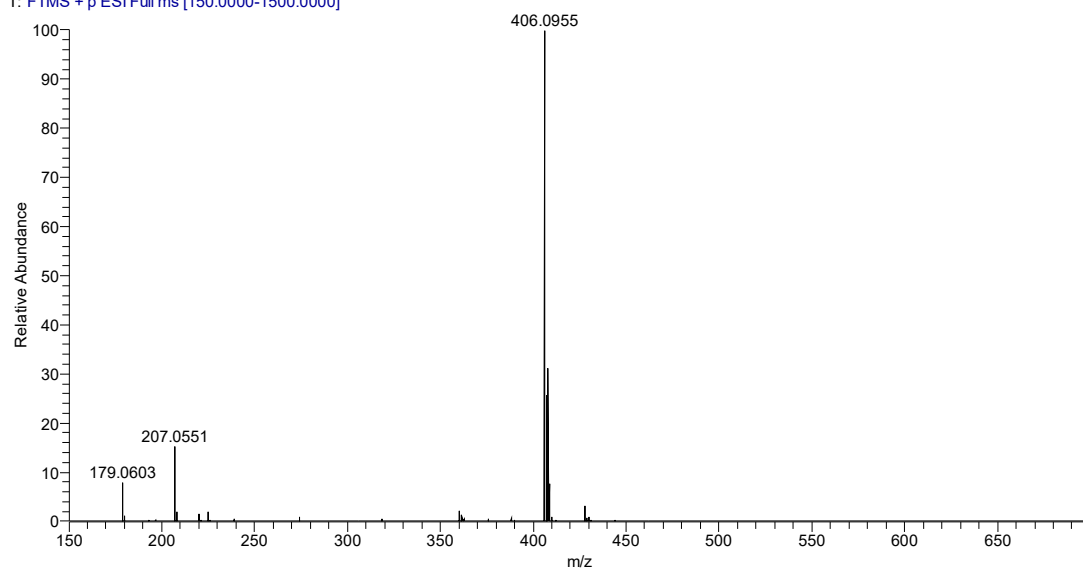

The HRMS spectrogram of compound F5

CC(=O)N(C(=O)c1ccc2nc3ccccc3nc21)c4ccc(Cl)cc4

Chemical shifts (ppm): 13.0120, 8.3785, 8.3289, 8.3133, 8.2925, 8.2059, 8.1481, 8.1222, 8.0508, 8.0374, 8.0341, 8.0409, 8.0351, 8.0172, 8.0154, 7.9998, 7.9855, 7.9838, 7.8407, 7.8372, 7.7803, 7.3759, 7.1465, 7.1427, 6.9278, 6.9127, 5.3480, 5.0099, 1.9534, 1.9350.

Integrations: 1.00, 1.00, 1.00, 1.36, 2.13, 0.96, 1.93, 1.00, 3.00.

1

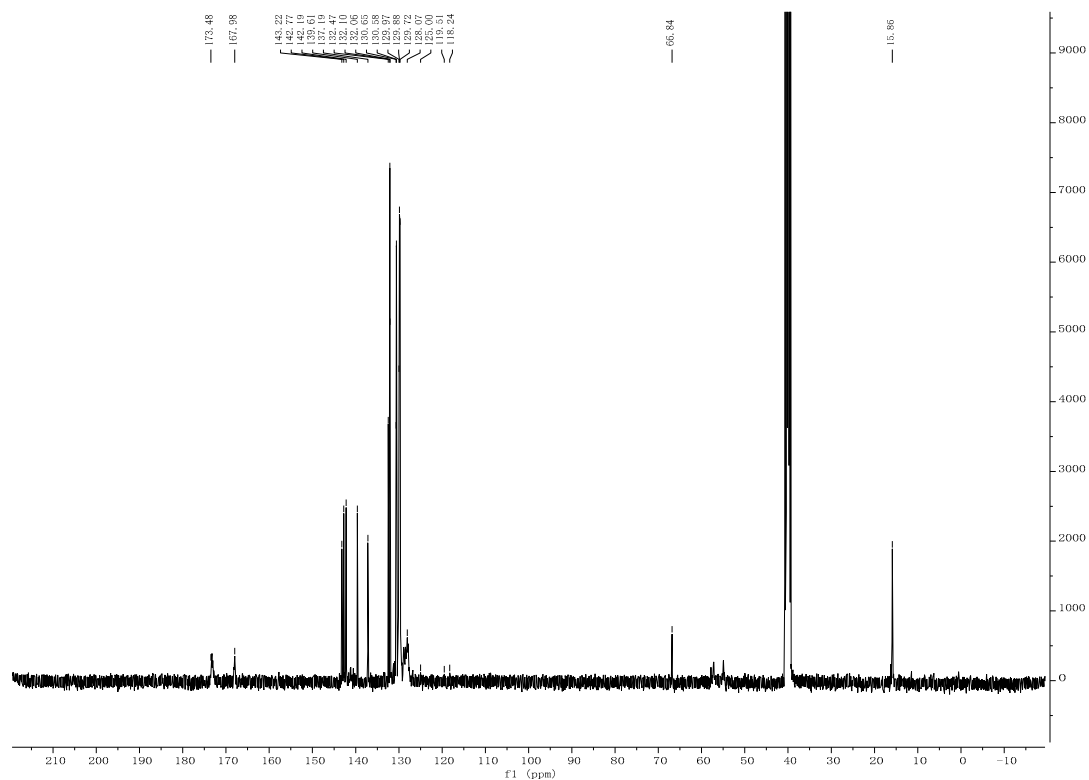

The  $^{13}\text{C}$  NMR spectrogram of compound F6

Y4 #95 RT: 0.51 AV: 1 NL: 1.07E10  
T: FTMS + p ESI Full ms [150.0000-1500.0000]

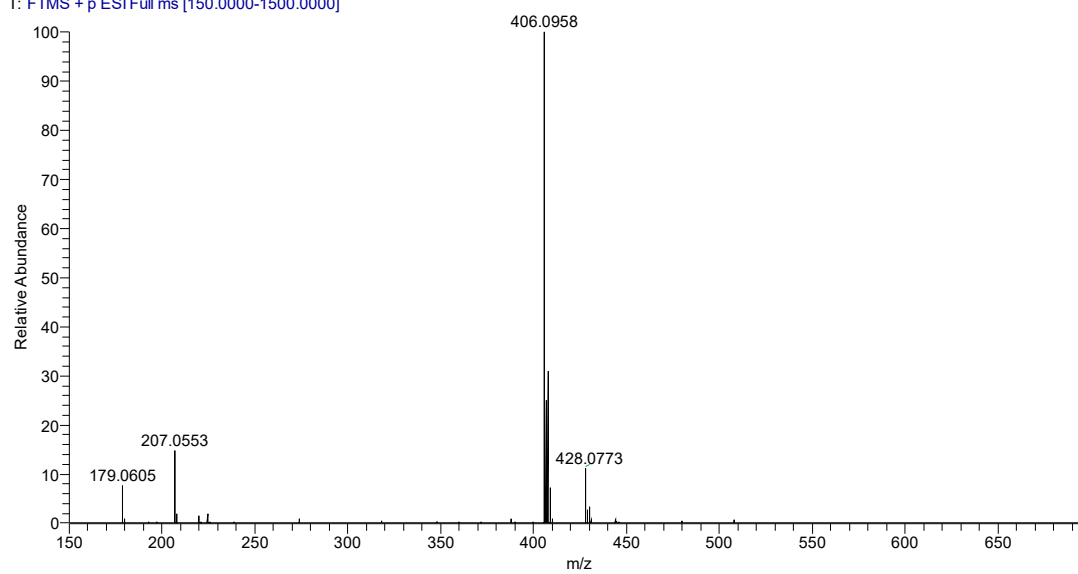

The HRMS spectrogram of compound F6

Compound **F7**,  
*N*-(4-chlorophenyl)-*N*-(phenazine-1-carbonyl)alanine

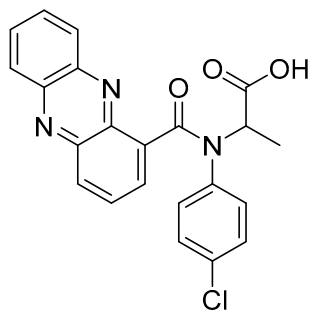

Yellow solid, yield 80.3%, m.p. 93.2-94.9°C;  $^1\text{H}$  NMR (400 MHz,  $\text{DMSO-}d_6$ )  $\delta$  12.99 (s, 1H), 8.39 – 8.27 (m, 1H), 8.22 (d,  $J = 8.3$  Hz, 1H), 8.13 (d,  $J = 10.0$  Hz, 1H), 8.02 (dtd,  $J = 12.7, 6.5, 3.5$  Hz, 2H), 7.90 – 7.65 (m, 2H), 7.34 – 7.15 (m, 2H), 7.00 (d,  $J = 7.4$  Hz, 2H), 5.16 (1H, two isomers), 1.46 (3H, two isomers).  $^{13}\text{C}$  NMR (101 MHz,  $\text{DMSO-}d_6$ )  $\delta$  173.51, 168.02, 143.28, 142.86, 142.25, 139.78, 137.29, 132.06, 130.56 (2C), 130.51 (2C), 129.96 (4C), 129.75, 128.67, 121.70 (2C), 57.44, 15.88. HRMS (ESI): calcd for  $\text{C}_{22}\text{H}_{16}\text{ClN}_3\text{O}_3$   $\{[\text{M}+\text{H}]^+\}$ , 406.0953; found, 406.0959.

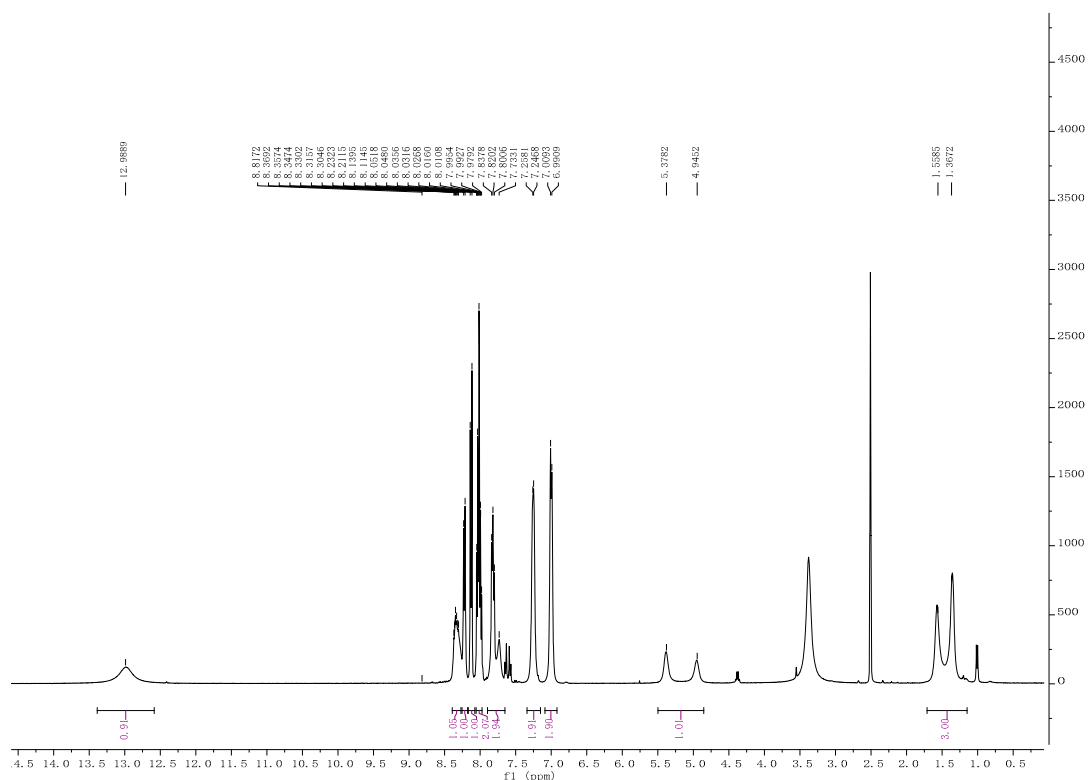

The  $^1\text{H}$  NMR spectrogram of compound **F7**

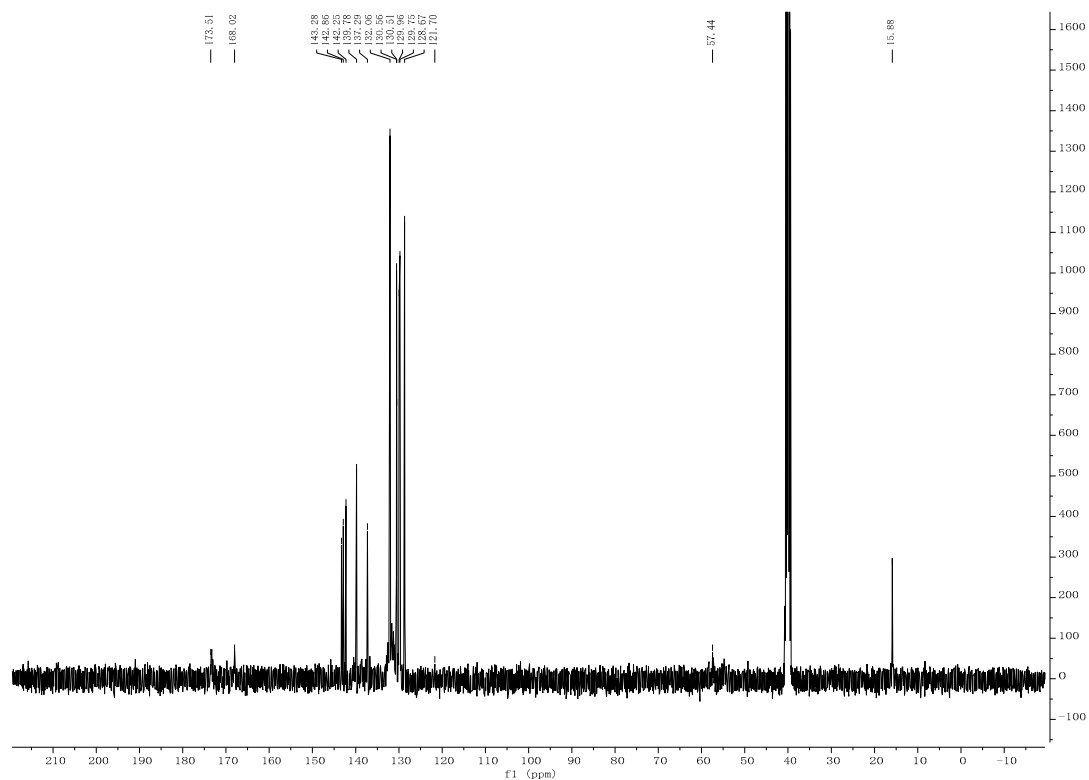

The  $^{13}\text{C}$  NMR spectrogram of compound F7

Y3 #90 RT: 0.48 AV: 1 NL: 6.28E9  
T: FTMS + p ESI Full ms [150.0000-1500.0000]

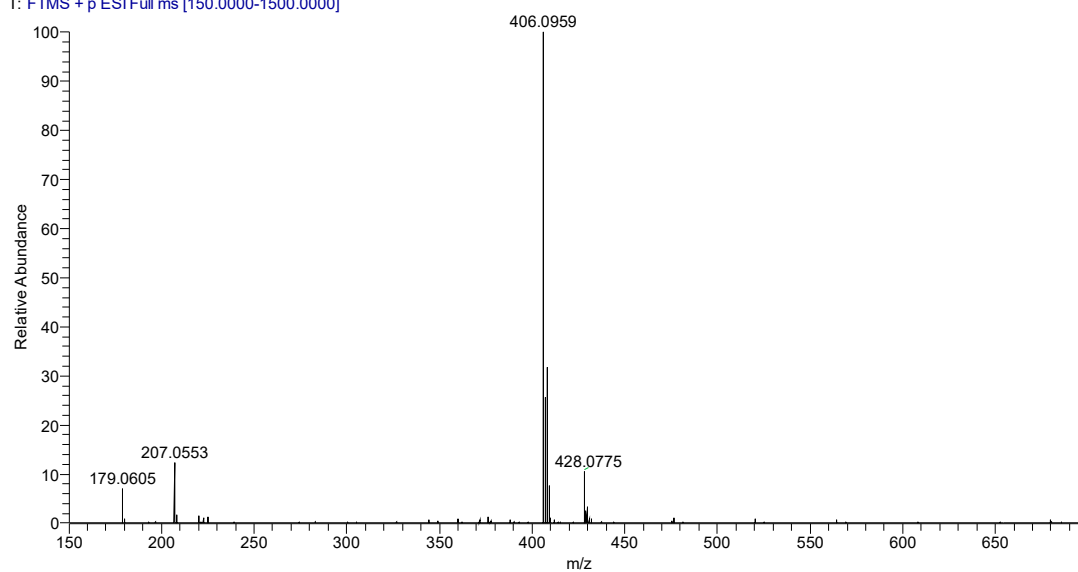

The HRMS spectrogram of compound F7

Compound **F8**,  
*N*-(3-bromophenyl)-*N*-(phenazine-1-carbonyl)alanine

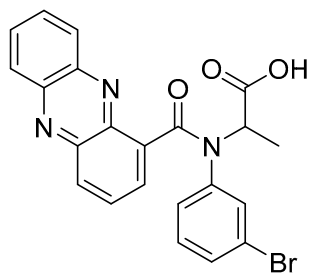

Brown solid, yield 80.2%, m.p. 116.5-117.3°C;  $^1\text{H}$  NMR (400 MHz,  $\text{DMSO}-d_6$ )  $\delta$  13.00 (s, 1H), 8.34 (dd,  $J = 18.0, 8.6$  Hz, 1H), 8.22 (d,  $J = 8.2$  Hz, 1H), 8.13 (d,  $J = 9.9$  Hz, 1H), 8.06 – 7.97 (m, 2H), 7.92 – 7.71 (m, 2H), 7.52 (d,  $J = 14.0$  Hz, 1H), 7.20 (d,  $J = 8.0$  Hz, 1H), 7.07 (s, 1H), 6.86 (d,  $J = 7.2$  Hz, 1H), 5.17 (1H, two isomers), 1.48 (3H, two isomers).  $^{13}\text{C}$  NMR (101 MHz,  $\text{DMSO}-d_6$ )  $\delta$  173.37, 167.89, 143.22, 142.78, 142.19, 139.60, 137.21, 132.10 (2C), 132.05 (2C), 130.89, 130.66 (2C), 130.56, 130.22, 129.91, 129.70, 120.67 (2C), 54.87, 15.88. HRMS (ESI): calcd for  $\text{C}_{22}\text{H}_{16}\text{BrN}_3\text{O}_3$   $\{[\text{M}+\text{H}]^+\}$ , 450.0448; found, 450.0451.

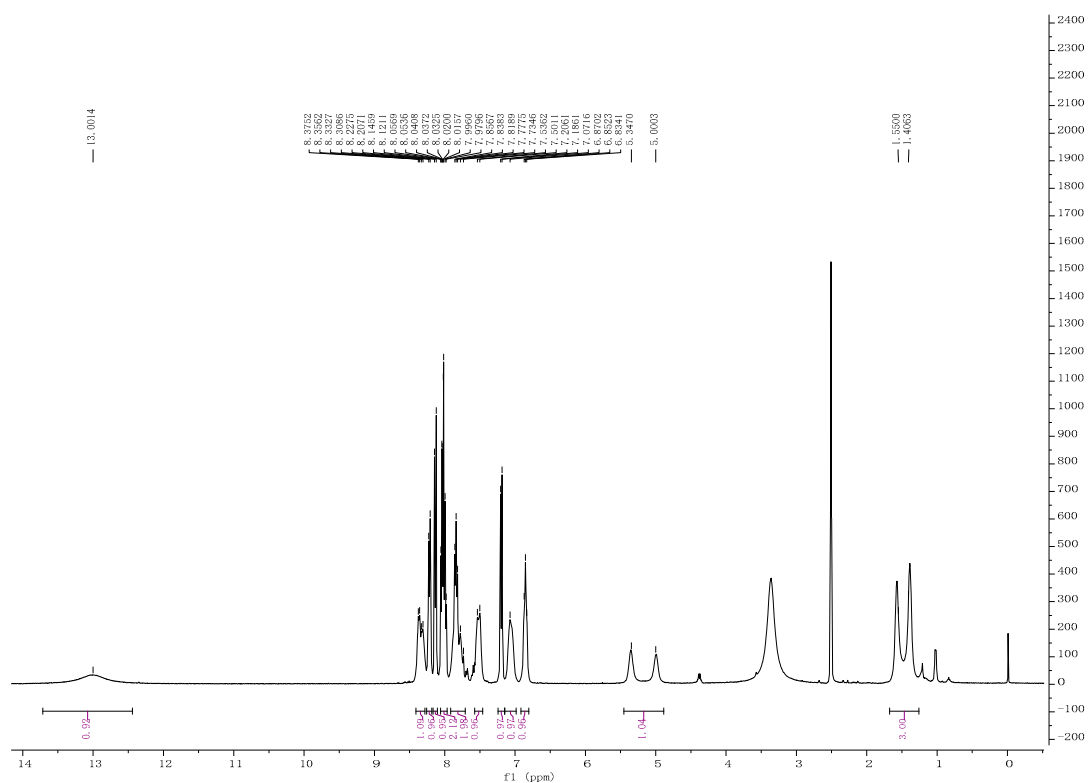

The  $^1\text{H}$  NMR spectrogram of compound **F8**



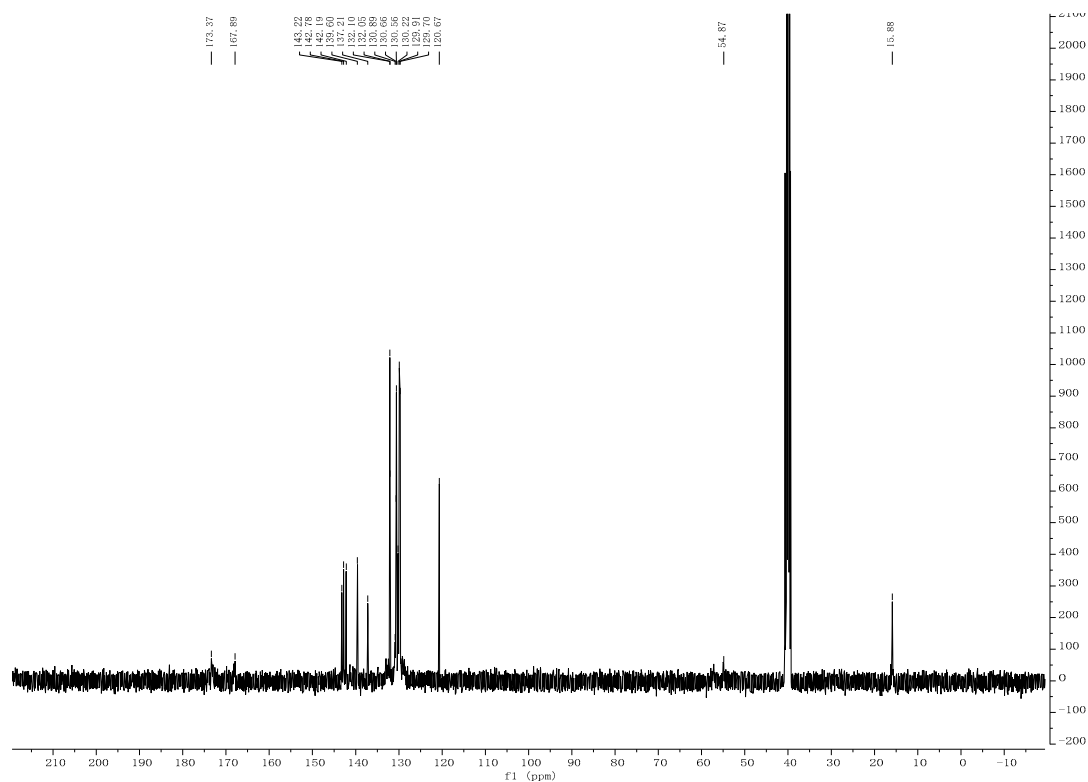

The  $^{13}\text{C}$  NMR spectrogram of compound **F8**

Y13

POS\_Y13 415 (2.353) AM (Cen,4, 80.00, Ar,10000.0,0.00,0.00); Cm (410:415)

I: TOF MS ES+  
4.51e6

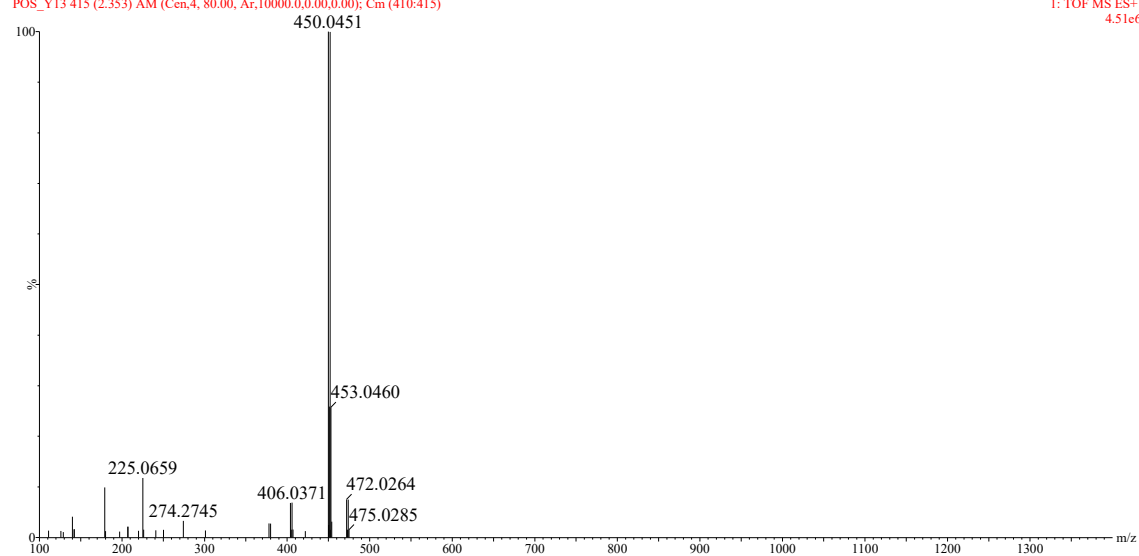

The HRMS spectrogram of compound **F8**

Compound **F9**,  
*N*-(4-bromophenyl)-*N*-(phenazine-1-carbonyl)alanine

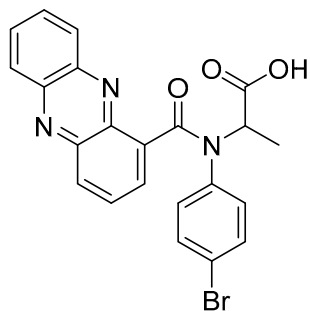

Brownness solid, yield 77.9%, m.p. 111.3-112.5°C;  $^1\text{H}$  NMR (400 MHz,  $\text{DMSO-}d_6$ )  $\delta$  12.98 (s, 1H), 8.33 (dd,  $J = 16.4, 9.2$  Hz, 1H), 8.22 (d,  $J = 8.3$  Hz, 1H), 8.12 (d,  $J = 9.9$  Hz, 1H), 8.05 – 7.96 (m, 2H), 7.85 – 7.69 (m, 2H), 7.15 (d,  $J = 12.7$  Hz, 4H), 5.16 (1H, two isomers), 1.46 (3H, two isomers).  $^{13}\text{C}$  NMR (101 MHz,  $\text{DMSO-}d_6$ )  $\delta$  172.98, 168.05, 143.29, 142.86, 142.23, 139.79, 137.24, 132.10, 131.68, 130.59, 130.53, 129.97, 129.87, 129.75, 121.28, 55.38, 15.92. HRMS (ESI): calcd for  $\text{C}_{22}\text{H}_{16}\text{BrN}_3\text{O}_3$   $\{[\text{M}+\text{H}]^+\}$ , 450.0448; found, 450.0451.

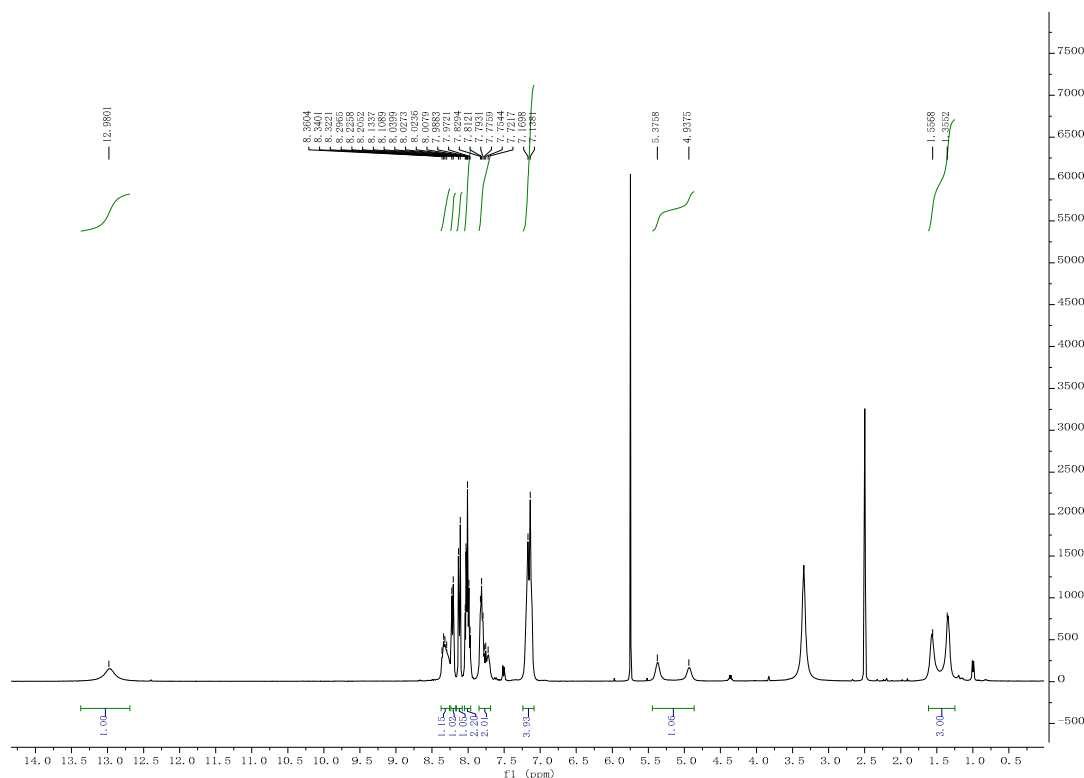

The  $^1\text{H}$  NMR spectrogram of compound **F9**

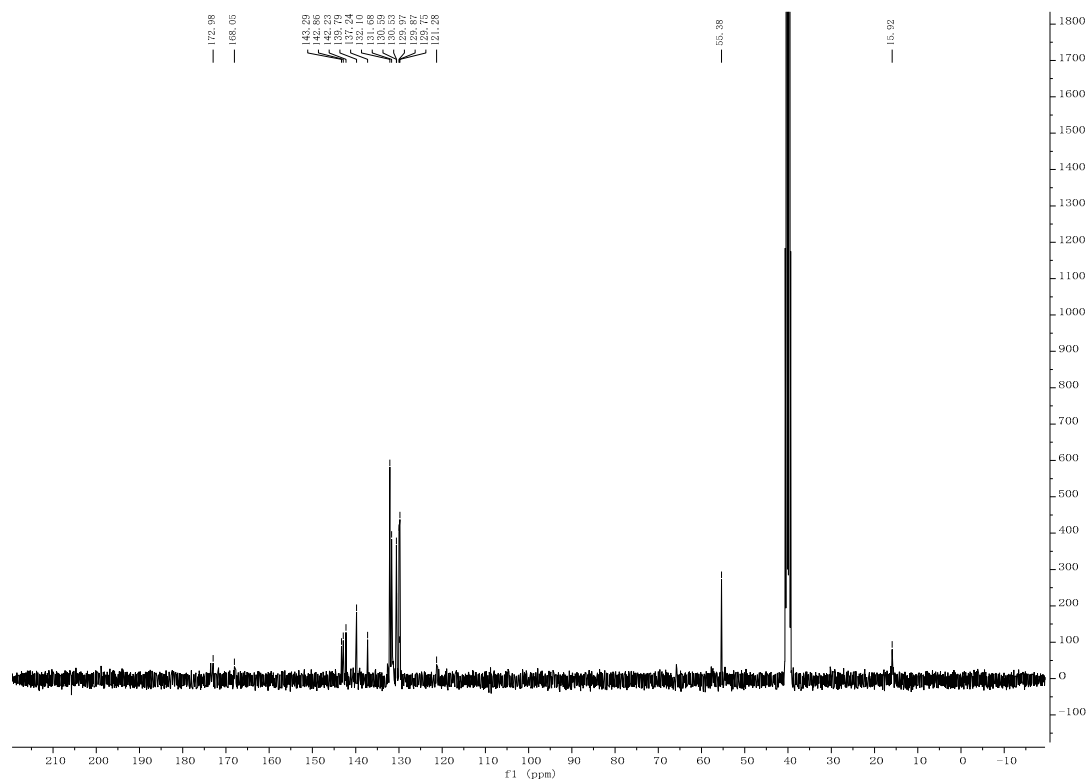

The  $^{13}\text{C}$  NMR spectrogram of compound **F9**

Y9 #92 RT: 0.49 AV: 1 NL: 7.53E9  
T: FTMS + p ESI Full ms [150.0000-1500.0000]

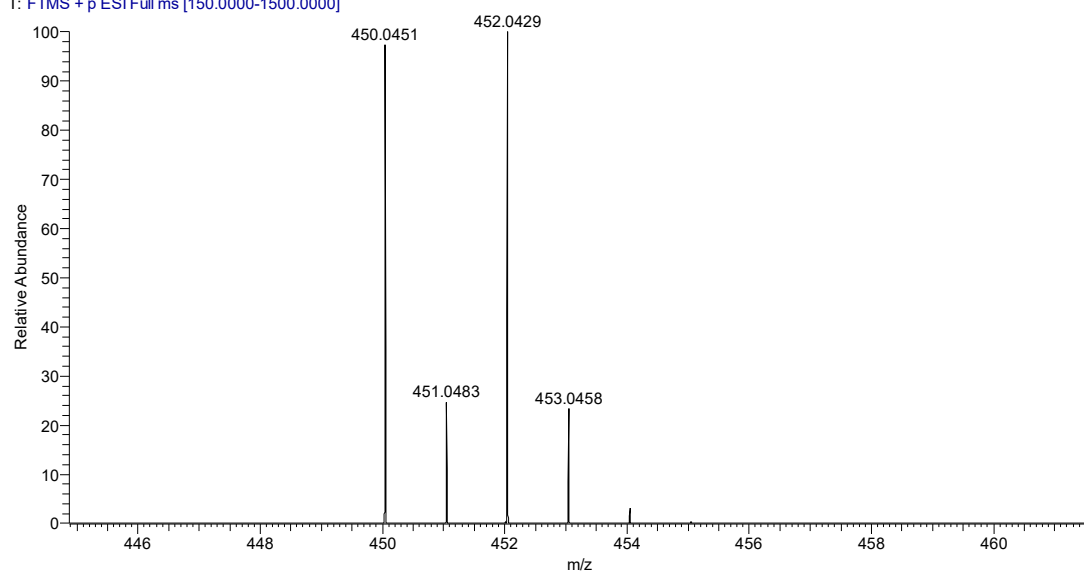

The HRMS spectrogram of compound **F9**

Compound **F10**,  
*N*-(phenazine-1-carbonyl)-*N*-(*m*-tolyl)alanine

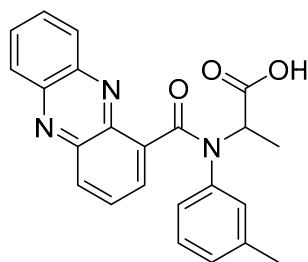

Purple solid, yield 80.2%, m.p. 94.2-95.3°C;  $^1\text{H}$  NMR (400 MHz,  $\text{DMSO}-d_6$ )  $\delta$  8.39 – 8.30 (m, 1H), 8.21 (d,  $J = 8.3$  Hz, 1H), 8.10 – 7.97 (m, 3H), 7.80 (s, 2H), 7.12 (s, 1H), 6.95 (d,  $J = 7.7$  Hz, 1H), 6.75 (d,  $J = 7.4$  Hz, 2H), 5.11 (1H, two isomers), 1.81 (s, 3H), 1.48 (3H, two isomers).  $^{13}\text{C}$  NMR (101 MHz,  $\text{DMSO}-d_6$ )  $\delta$  173.67, 168.26, 143.12, 142.73, 142.23, 139.87 (2C), 137.79, 132.04, 131.97, 131.93, 130.55, 130.24, 129.88, 129.70, 129.63, 128.21, 127.02, 119.95, 119.02, 57.86, 54.65, 20.80, 15.87. HRMS (ESI): calcd for  $\text{C}_{23}\text{H}_{19}\text{N}_3\text{O}_3$   $\{[\text{M}+\text{H}]^+\}$ , 386.1500; found, 386.1503.

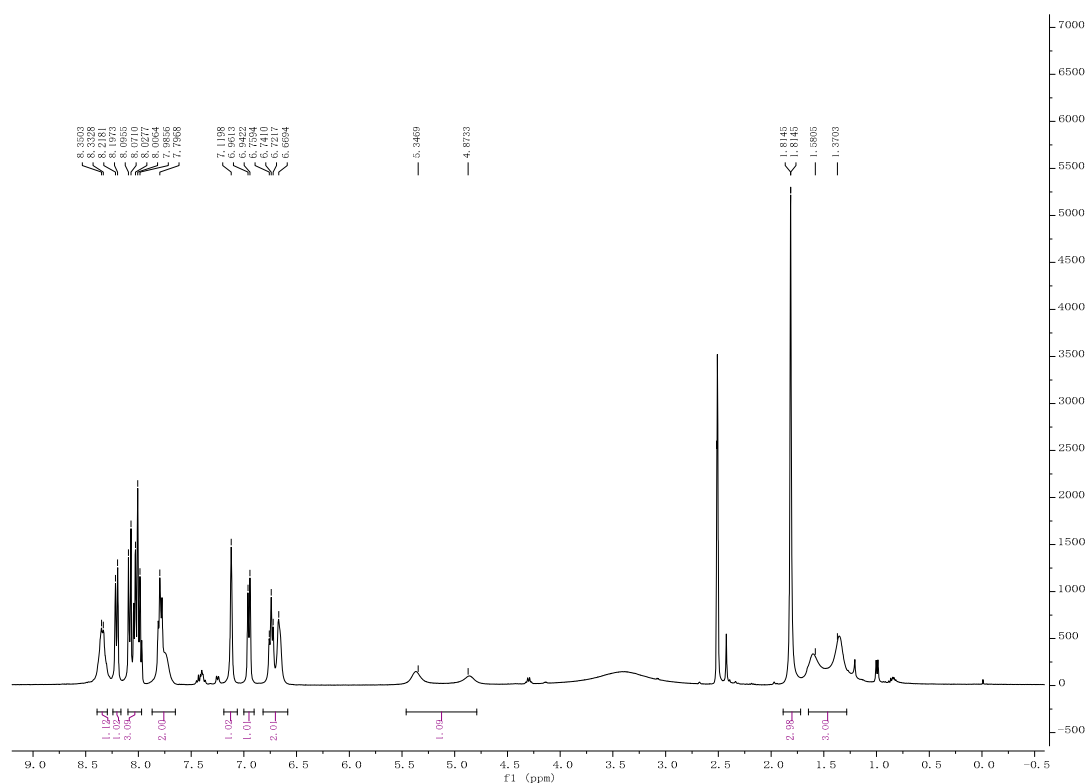

The  $^1\text{H}$  NMR spectrogram of compound **F10**

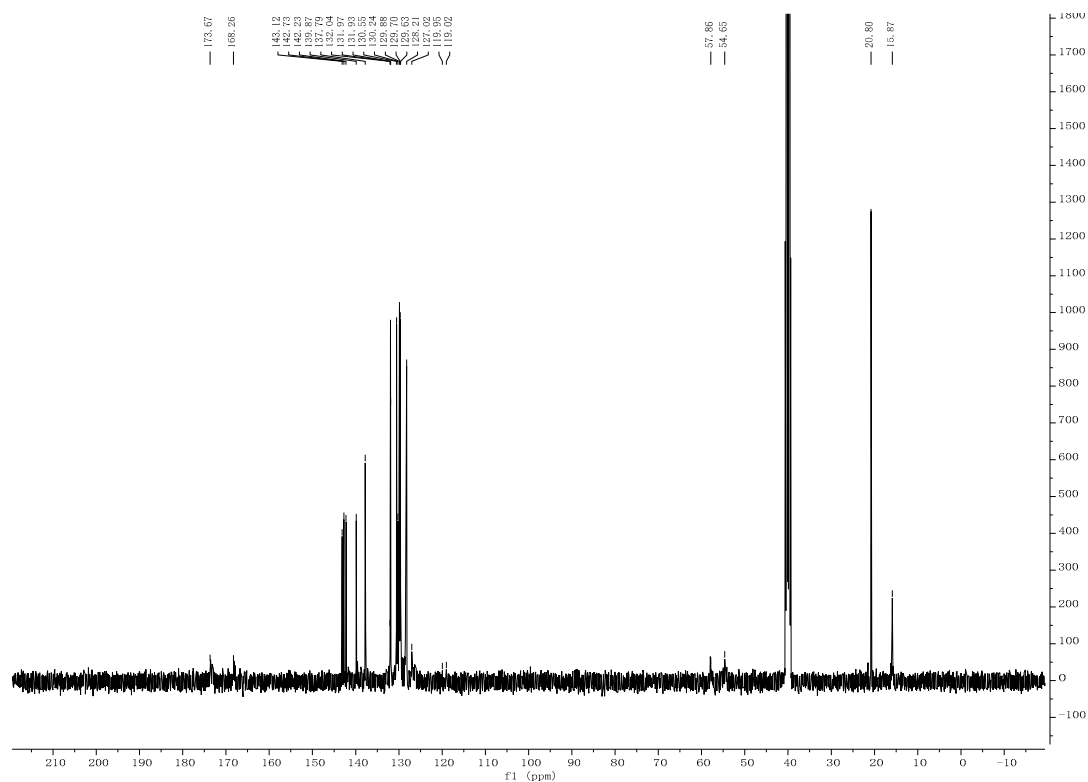

The  $^{13}\text{C}$  NMR spectrogram of compound **F10**

Y5

POS\_Y5 417 (2.364) AM (Cen,4, 80.00, Ar,10000.0,0.00,0.00)

1: TOF MS ES+  
2.74e6

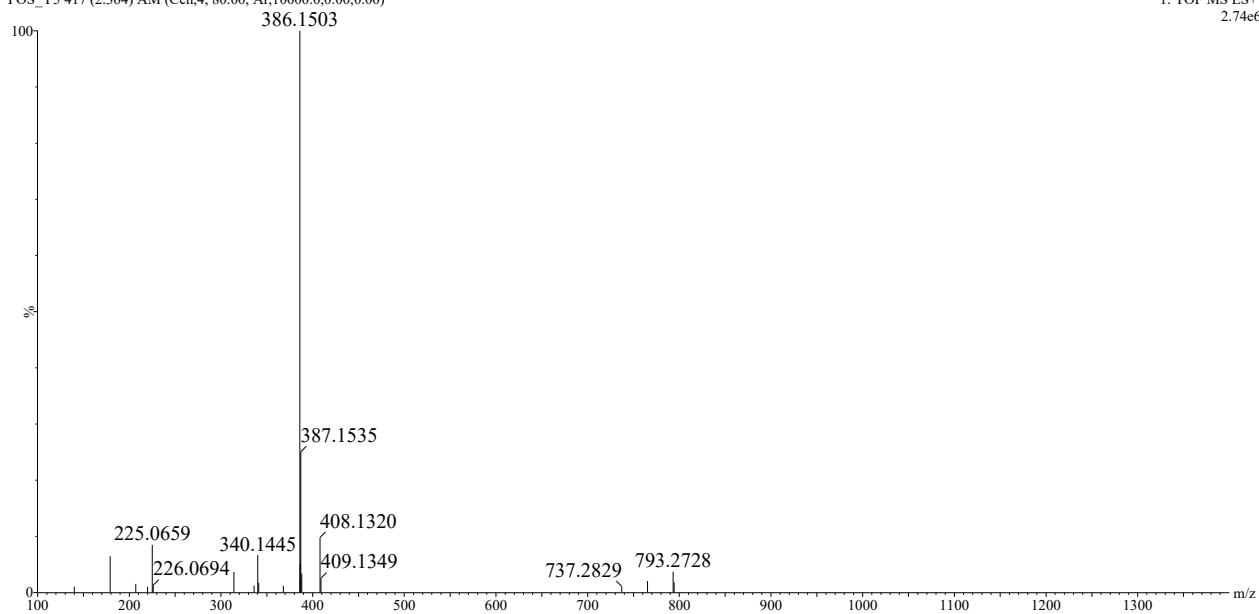

The HRMS spectrogram of compound **F10**

Compound **F11**,  
*N*-(3-ethylphenyl)-*N*-(phenazine-1-carbonyl)alanine

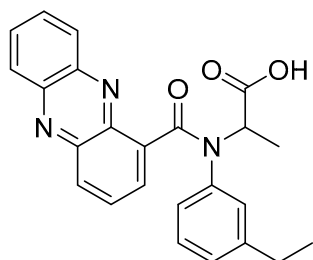

Yellow solid, yield 81.1%, m.p. 94.5-96.4°C;  $^1\text{H}$  NMR (400 MHz,  $\text{DMSO-}d_6$ )  $\delta$  12.88 (s, 1H), 8.35 (s, 1H), 8.21 (d,  $J = 8.3$  Hz, 1H), 8.10 – 7.96 (m, 3H), 7.85 – 7.66 (m, 2H), 7.02 (d,  $J = 7.1$  Hz, 2H), 6.75 (d,  $J = 58.9$  Hz, 2H), 5.38 (1H, two isomers), 2.07 (q,  $J = 7.0$  Hz, 2H), 1.48 (3H, two isomers), 0.37 (s, 3H).  $^{13}\text{C}$  NMR (101 MHz,  $\text{DMSO-}d_6$ )  $\delta$  173.64, 168.15, 144.06, 143.16, 142.78, 142.21, 139.87, 137.76, 131.97, 130.54 (2C), 130.19, 129.89, 129.69, 129.57, 128.41 (2C), 127.42, 127.01, 123.13, 57.60, 27.85, 15.89, 15.12. HRMS (ESI): calcd for  $\text{C}_{24}\text{H}_{21}\text{N}_3\text{O}_3$   $\{[\text{M}+\text{H}]^+\}$ , 400.1656; found, 400.1658.

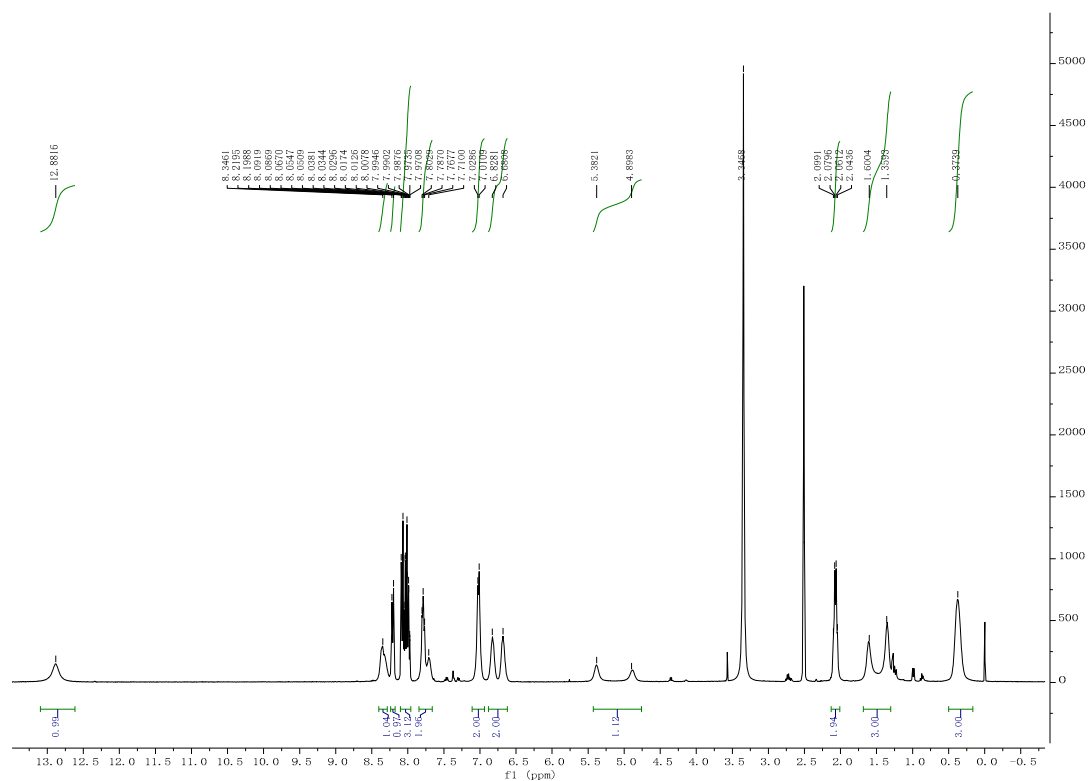

The  $^1\text{H}$  NMR spectrum of compound **F11**

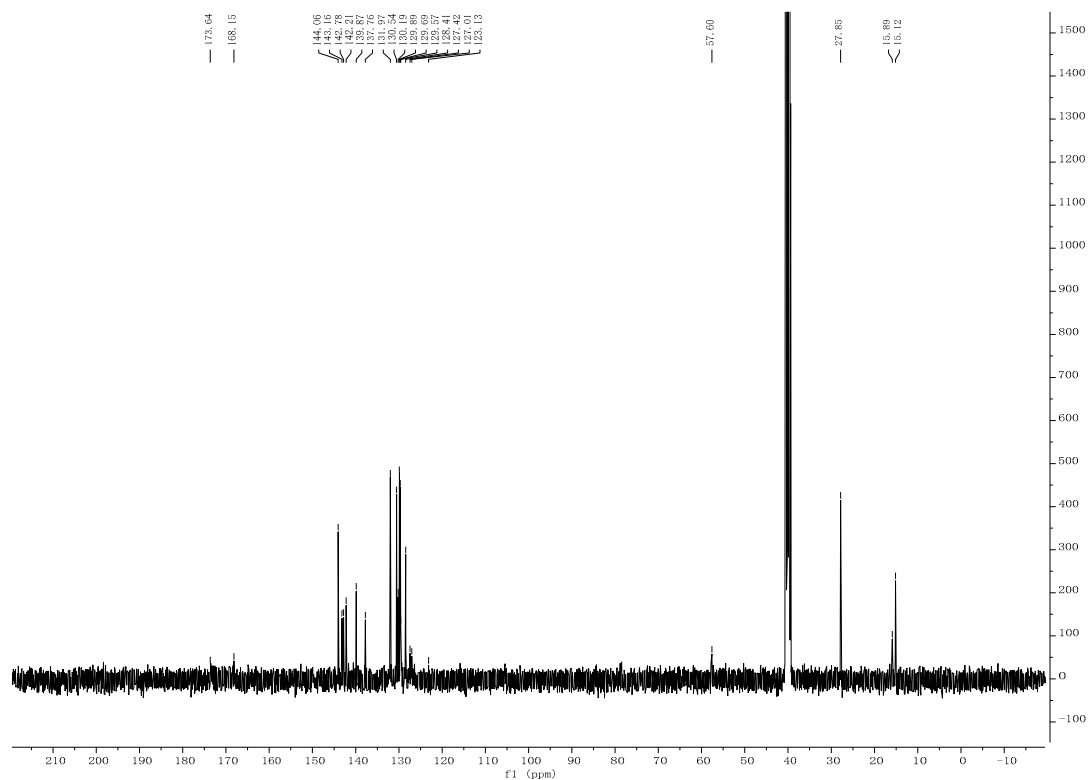

The  $^{13}\text{C}$  NMR spectrogram of compound **F11**

Y7 #109 RT: 0.58 AV: 1 NL: 8.89E9  
T: FTMS + p ESI Full ms [150.0000-1500.0000]

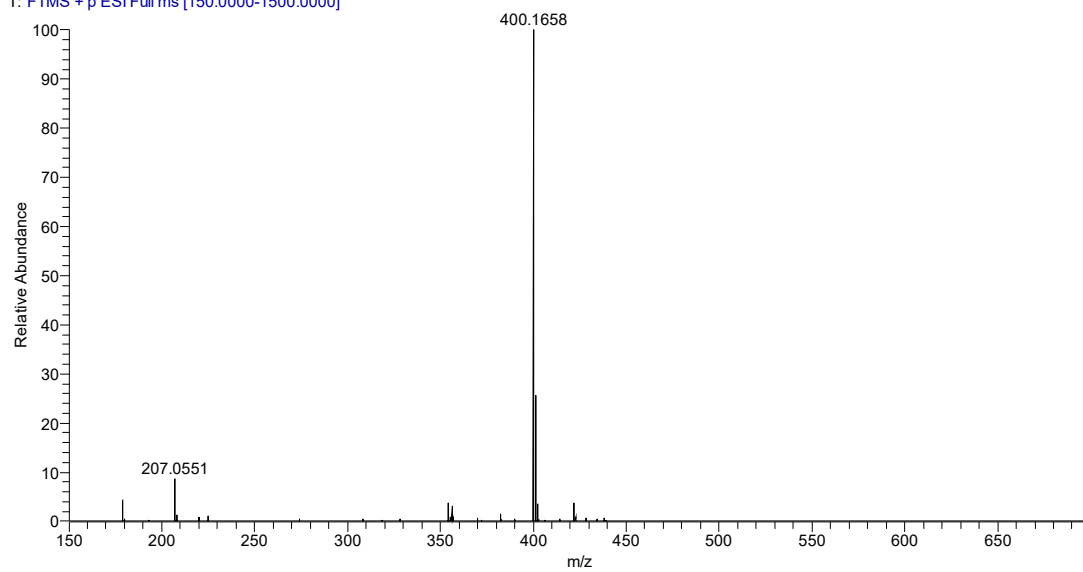

The HRMS spectrogram of compound **F11**

Compound **F12**,  
*N*-(4-ethylphenyl)-*N*-(phenazine-1-carbonyl)alanine

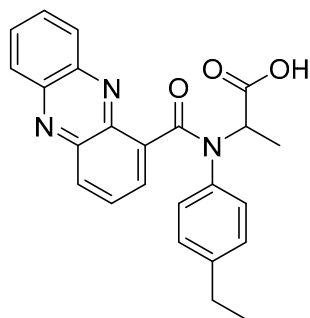

Yellow solid, yield 83.1%, m.p. 91.8-93.4°C;  $^1\text{H}$  NMR (400 MHz,  $\text{DMSO-}d_6$ )  $\delta$  12.86 (s, 1H), 8.33 (s, 1H), 8.21 (d,  $J = 8.1$  Hz, 1H), 8.10 – 7.96 (m, 3H), 7.84 – 7.62 (m, 2H), 7.13 (d,  $J = 7.9$  Hz, 2H), 6.74 (d,  $J = 7.8$  Hz, 2H), 5.13 (1H, two isomers), 2.24 (q,  $J = 7.4$  Hz, 2H), 1.46 (3H, two isomers), 0.85 (t,  $J = 7.5$  Hz, 3H).  $^{13}\text{C}$  NMR (101 MHz,  $\text{DMSO-}d_6$ )  $\delta$  173.59, 167.54, 143.57, 143.20, 142.82, 142.27, 139.99, 137.71, 131.99, 130.58, 130.16, 129.97, 129.72, 129.50, 127.90, 121.71, 54.51, 27.71, 15.82, 15.36. HRMS (ESI): calcd for  $\text{C}_{24}\text{H}_{21}\text{N}_3\text{O}_3$   $\{[\text{M}+\text{H}]^+\}$ , 400.1656; found, 400.1662.

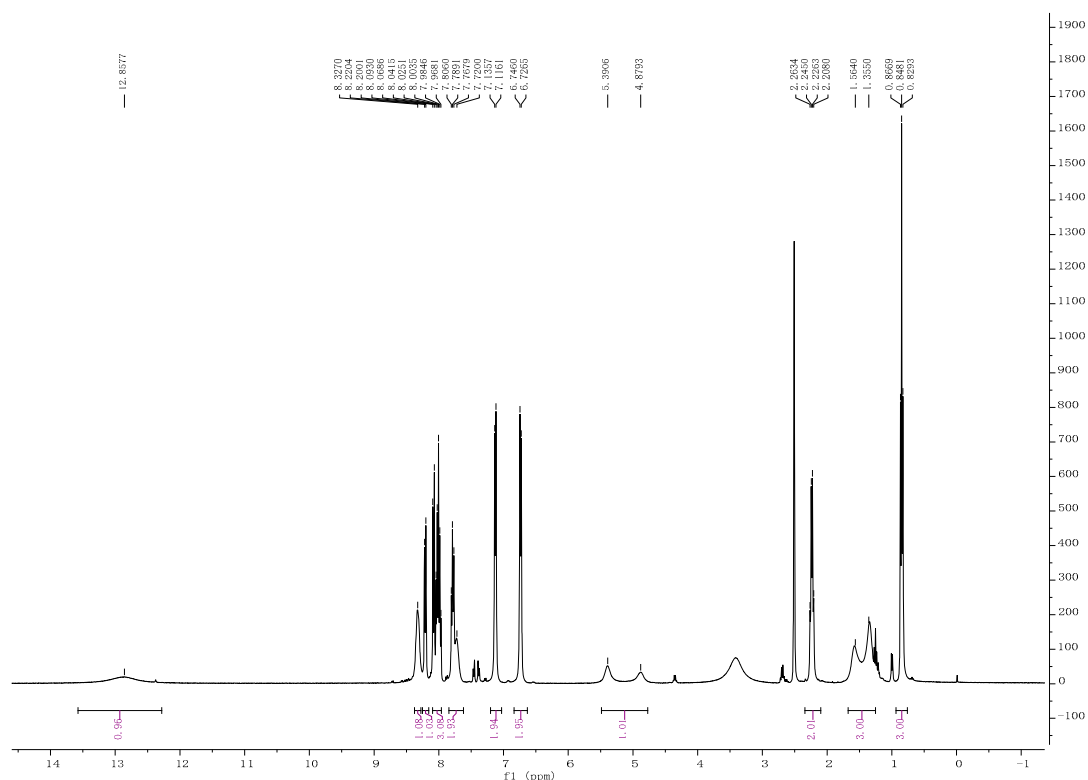

The  $^1\text{H}$  NMR spectrogram of compound **F12**



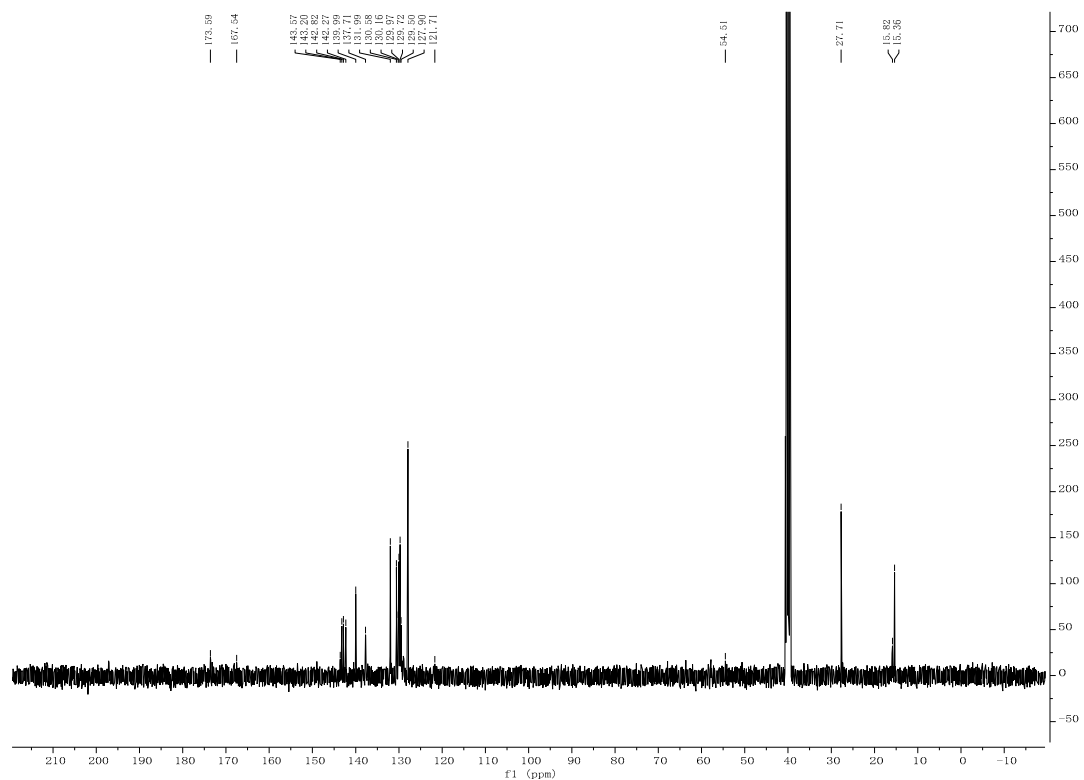

The  $^{13}\text{C}$  NMR spectrogram of compound **F12**

Y15

POS\_Y15 429 (2.426) AM (Cen.4, 80.00, Ar.10000.0.0.00.0.00)

1: TOF MS ES+  
2.22e6

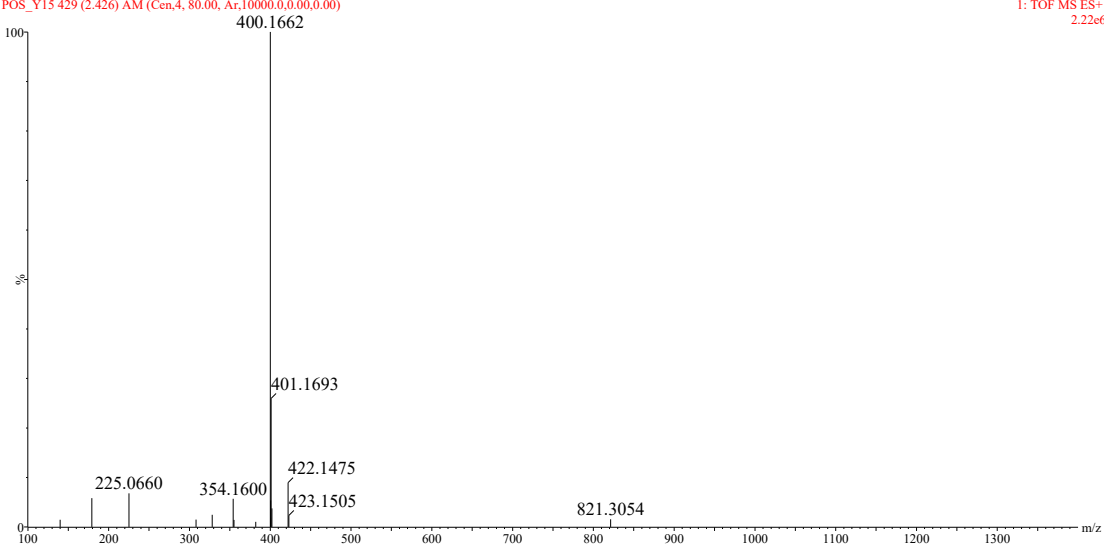

The HRMS spectrogram of compound **F12**

*N*-(3-isopropylphenyl)-*N*-(phenazine-1-carbonyl)alanine

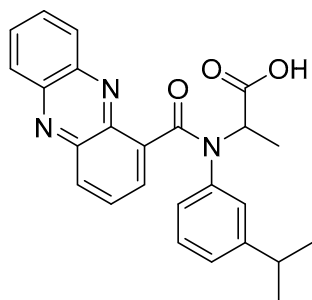

<sup>1</sup>H NMR spectrum of compound 10 in CDCl<sub>3</sub>. The spectrum shows peaks from 0 to 13 ppm. Key features include a singlet at ~12.8 ppm (1H), a multiplet at ~8.2 ppm (3H), a multiplet at ~7.7 ppm (3H), a multiplet at ~6.7 ppm (3H), a singlet at ~5.4 ppm (1H), a singlet at ~4.9 ppm (1H), a singlet at ~3.4 ppm (3H), a doublet at ~2.3 ppm (3H), a doublet at ~1.6 ppm (3H), and a multiplet at ~0.3 ppm (6H). Integration values are shown below the peaks: 0.97, 0.96, 3.13, 1.35, 3.03, 0.96, 1.07, 1.03, 3.01, and 6.04. A list of chemical shifts (delta) is provided at the top: 12.8602, 8.3655, 8.3441, 8.2199, 8.1582, 8.0577, 8.0373, 8.0126, 7.9688, 7.9292, 7.7745, 7.7533, 7.6544, 7.0324, 6.9528, 6.7103, 6.7012, 5.4004, 4.9318, 3.3440, 2.3379, 2.3213, 2.3048, 1.5973, 1.3623, 0.5362, 0.4661, and 0.3123.

The  $^1\text{H}$  NMR spectrogram of compound **F13**

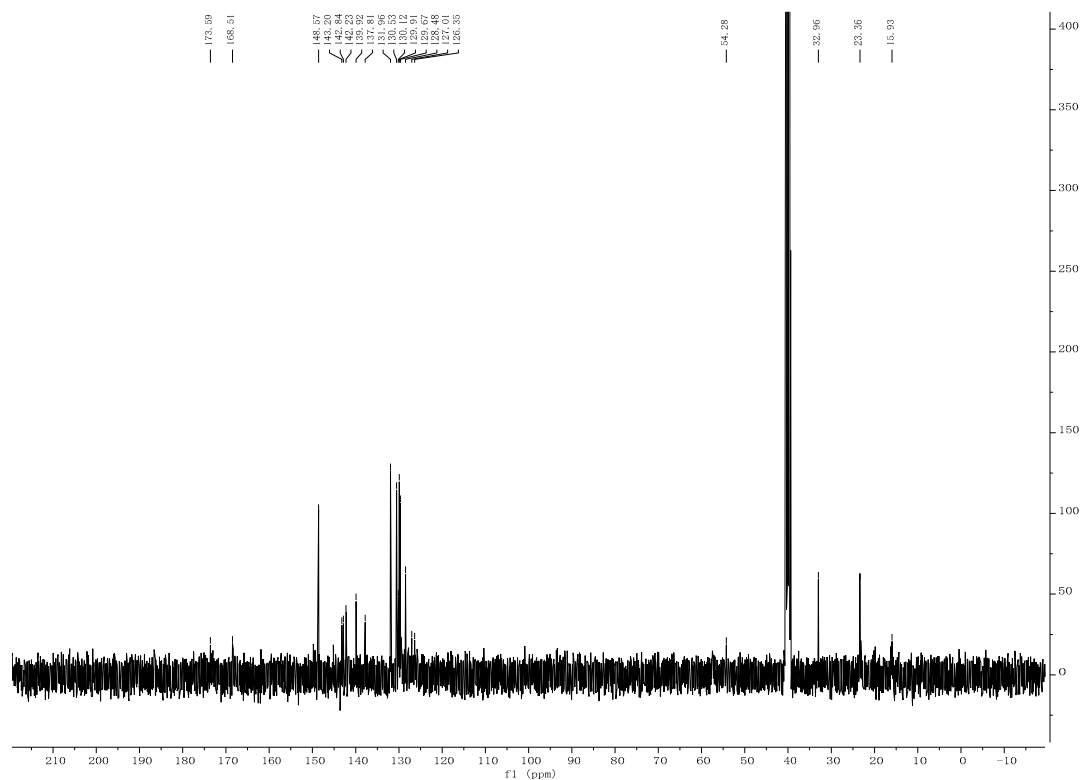

The  $^{13}\text{C}$  NMR spectrogram of compound **F13**

Y12

POS\_Y12 449 (2.552) AM (Cen,4, 80.00, Ar,10000.0,0.00,0.00)

1: TOF MS ES+  
2.11e6

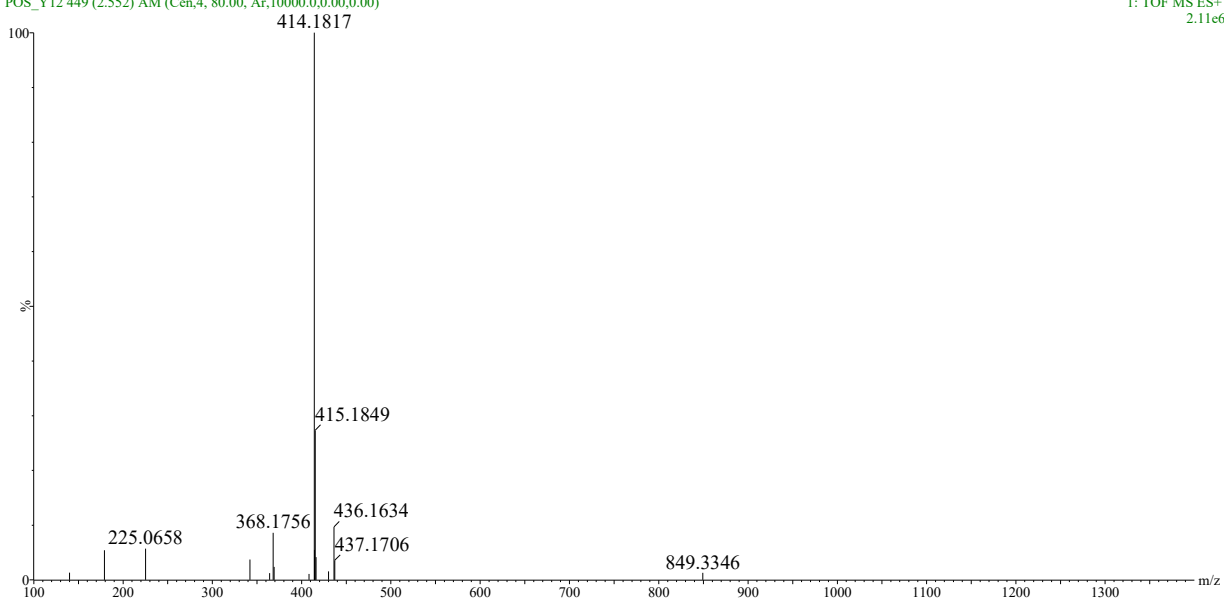

The HRMS spectrogram of compound **F13**

Compound **F14**,  
*N*-(4-isopropylphenyl)-*N*-(phenazine-1-carbonyl)alanine

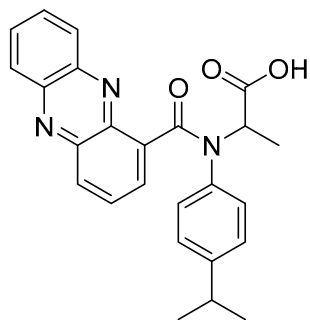

Yellow solid, yield 81.7%, m.p. 71.9-73.7°C;  $^1\text{H}$  NMR (400 MHz, Chloroform-*d*)  $\delta$  8.45 (d,  $J = 8.1$  Hz, 1H), 8.24 (d,  $J = 7.9$  Hz, 1H), 8.16 (d,  $J = 8.7$  Hz, 1H), 8.02 – 7.87 (m, 3H), 7.76 (s, 1H), 7.01 (d,  $J = 6.8$  Hz, 2H), 6.75 (d,  $J = 8.4$  Hz, 2H), 5.91 (s, 1H), 2.57 (sep,  $J = 6.8$  Hz, 1H), 1.52 (s, 3H), 0.95 (d,  $J = 6.9$  Hz, 6H).  $^{13}\text{C}$  NMR (101 MHz, DMSO-*d*<sub>6</sub>)  $\delta$  173.55, 168.26, 143.17, 142.79, 142.27 (2C), 140.00, 137.68, 131.93, 130.52, 130.16, 129.97, 129.692 (2C), 129.55 (2C), 127.38 (2C), 126.35 (2C), 54.60, 32.97, 24.33, 23.80, 15.89. HRMS (ESI): calcd for  $\text{C}_{25}\text{H}_{23}\text{N}_3\text{O}_3$   $\{[\text{M}+\text{H}]^+\}$ , 414.1813; found, 414.1818.

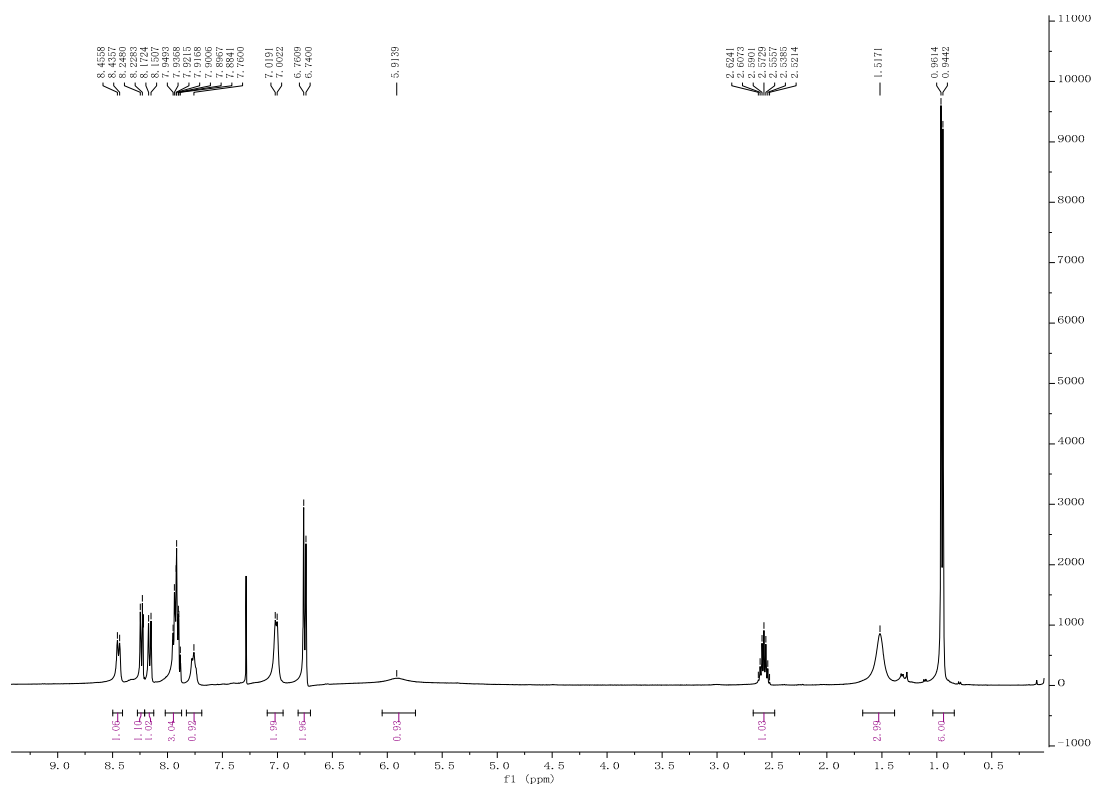

The  $^1\text{H}$  NMR spectrogram of compound **F14**

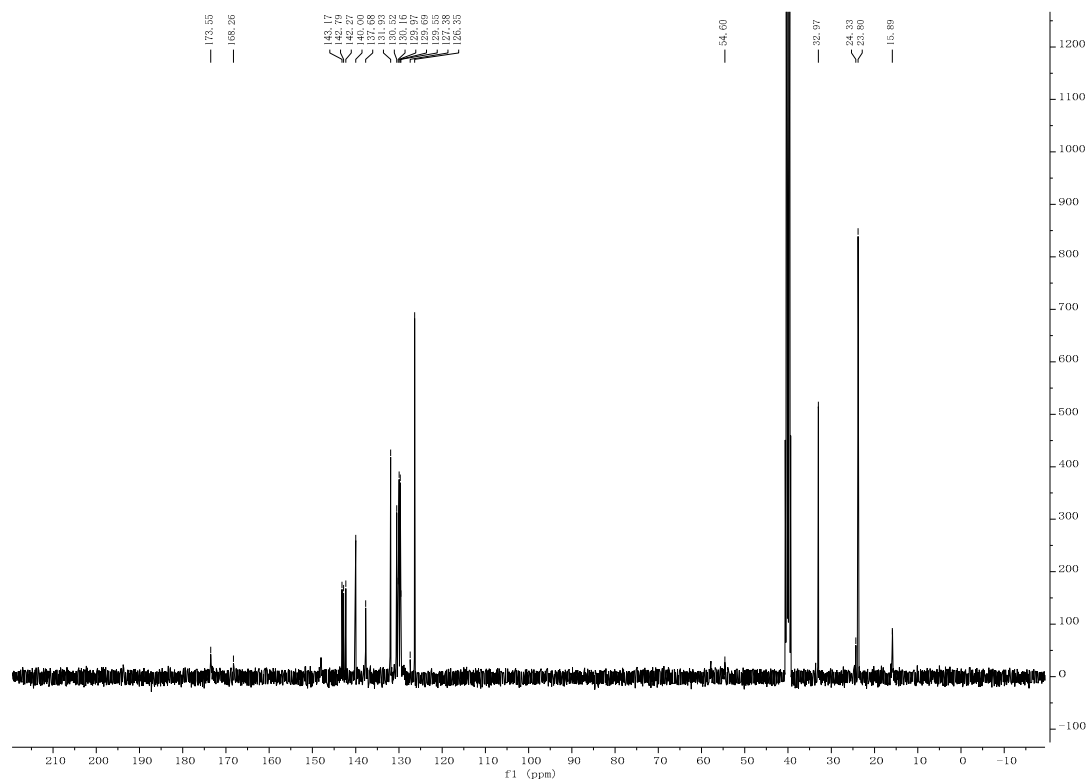

The  $^{13}\text{C}$  NMR spectrogram of compound **F14**

Y16

POS\_Y16 482 (2.726) AM (Cen,4, 80.00, Ar,10000.0,0.00,0.00)

1: TOF MS ES+  
2.37e6

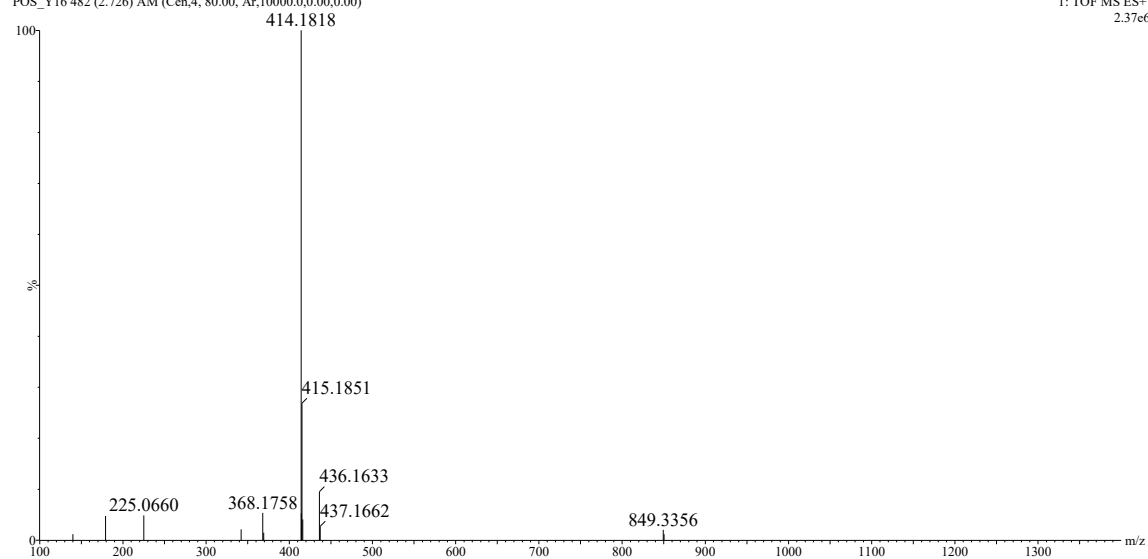

The HRMS spectrogram of compound **F14**

Compound **F15**,  
*N*-(2,6-dimethylphenyl)-*N*-(phenazine-1-carbonyl)alanine

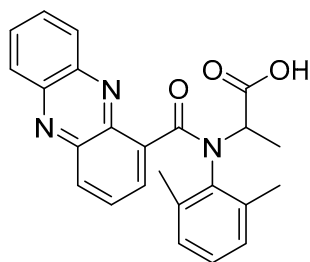

Yellow solid, yield 79.3%, m.p. 103.4-104.8°C;  $^1\text{H}$  NMR (400 MHz,  $\text{DMSO}-d_6$ )  $\delta$  12.68 (s, 1H), 8.26 – 8.18 (m, 2H), 8.09 (td,  $J = 5.5, 4.6, 2.6$  Hz, 1H), 8.03 – 7.94 (m, 2H), 7.81 (d,  $J = 6.3$  Hz, 2H), 6.81 – 6.62 (m, 3H), 4.70 (1H, two isomers), 2.47 (d,  $J = 11.5$  Hz, 6H), 1.12 (3H, two isomers).  $^{13}\text{C}$  NMR (101 MHz,  $\text{DMSO}-d_6$ )  $\delta$  173.66, 168.93, 143.08, 142.36, 142.31, 140.19, 138.40, 137.00 (2C), 132.06, 131.97, 130.47, 130.27 (2C), 129.80, 129.50 (2C), 128.73, 128.38, 128.29, 50.65, 19.44 (2C), 15.55. HRMS (ESI): calcd for  $\text{C}_{24}\text{H}_{21}\text{N}_3\text{O}_3$   $\{[\text{M}+\text{H}]^+\}$ , 400.1656; found, 400.1660.

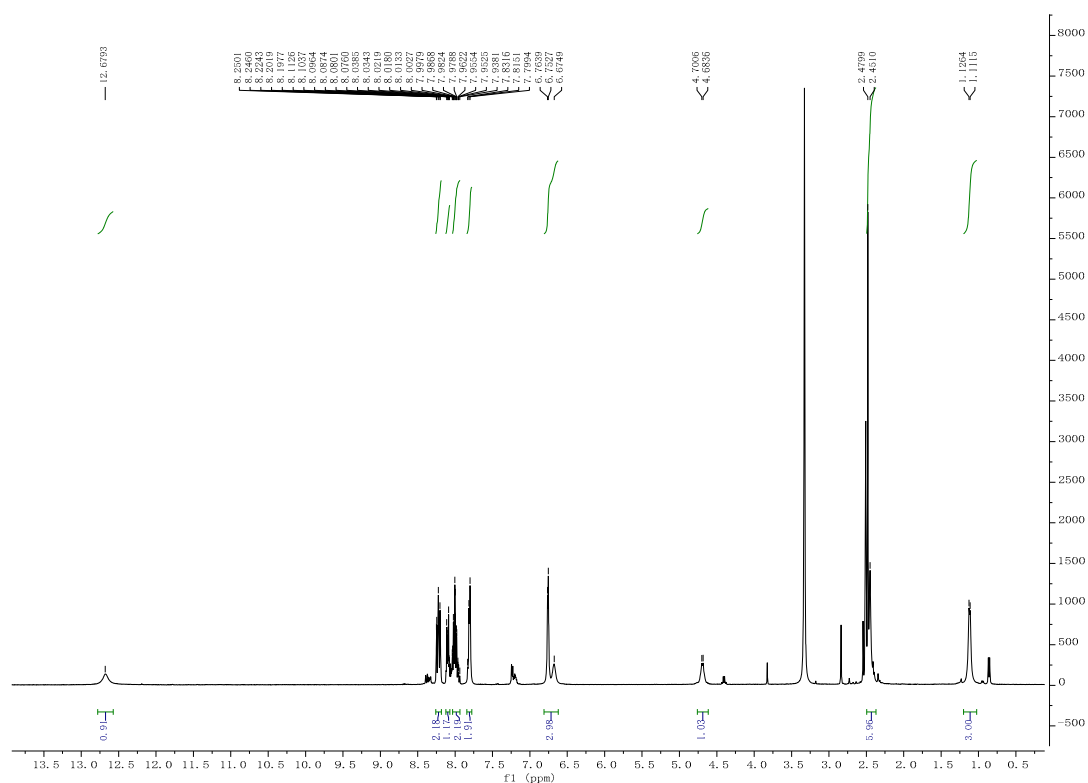

The  $^1\text{H}$  NMR spectrogram of compound **F15**

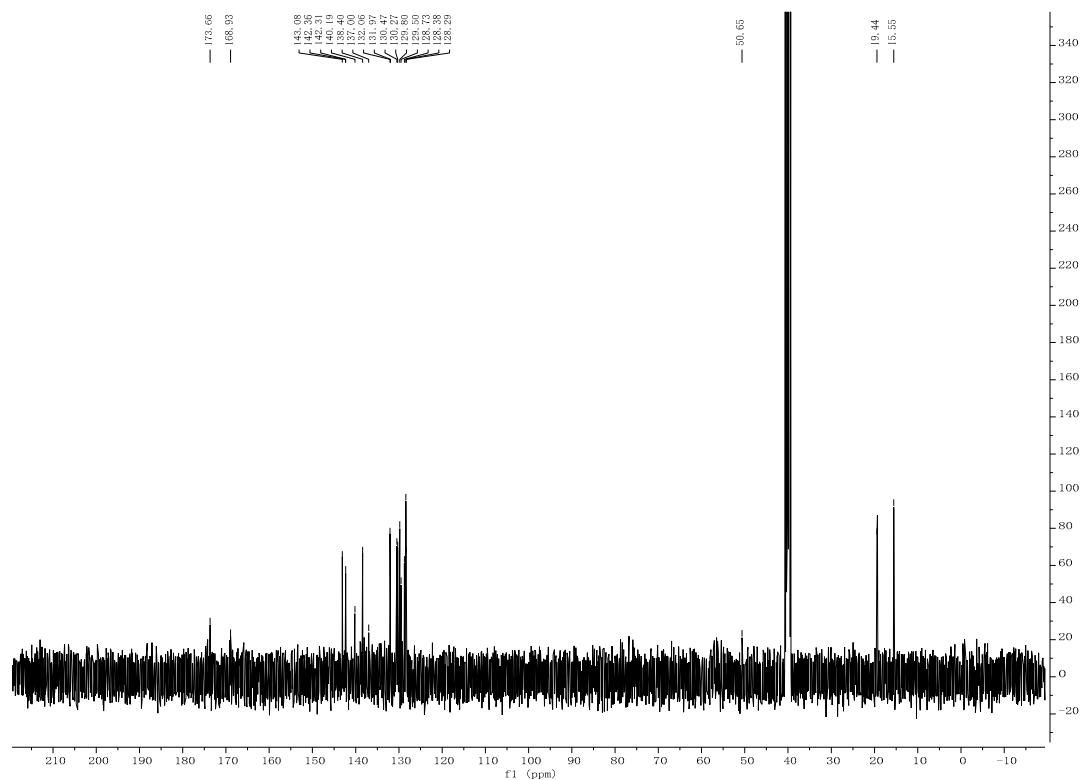

The  $^{13}\text{C}$  NMR spectrogram of compound **F15**

Y2

POS\_Y2 448 (2.548) AM (Cen,4, 80.00, Ar,10000.0,0.00,0.00); Cm (448:451)

1: TOF MS ES+  
3.01e6

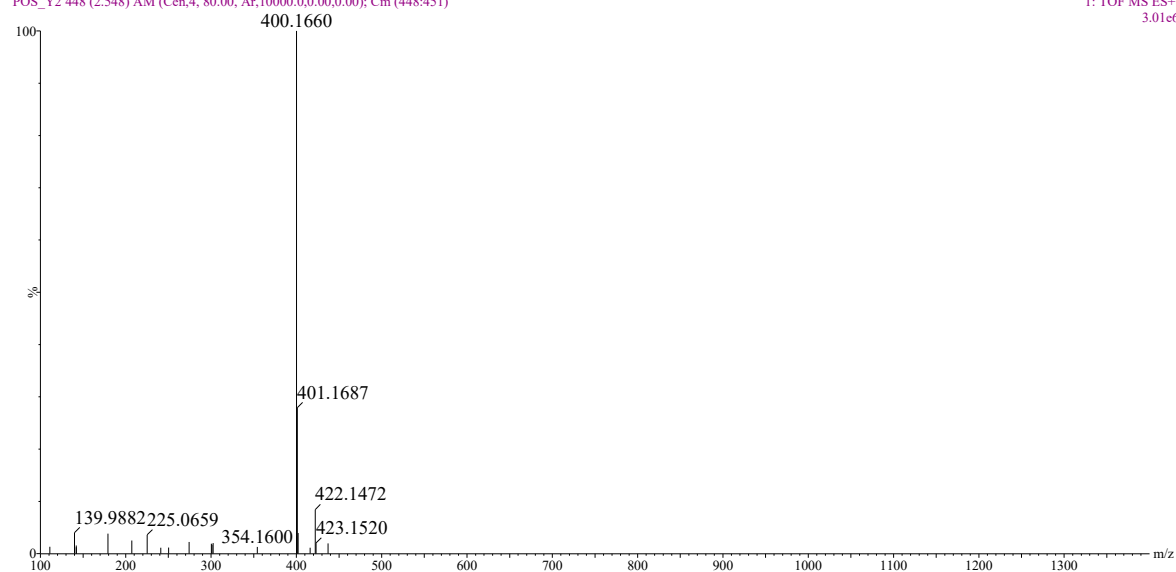

The HRMS spectrogram of compound **F15**

Compound **F16**,  
*N*-(3-nitrophenyl)-*N*-(phenazine-1-carbonyl)alanine

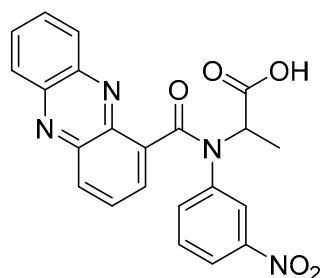

Yellow solid, yield 77.9%, m.p. 99.3-100.8°C;  $^1\text{H}$  NMR (400 MHz,  $\text{DMSO}-d_6$ )  $\delta$  13.10 (s, 1H), 8.41 – 8.28 (m, 1H), 8.25 – 8.09 (m, 3H), 8.09 – 7.90 (m, 3H), 7.83 (s, 1H), 7.78 – 7.50 (m, 2H), 7.20 (t,  $J = 7.4$  Hz, 1H), 5.25 (1H, two isomers), 1.51 (3H, two isomers).  $^{13}\text{C}$  NMR (101 MHz,  $\text{DMSO}-d_6$ )  $\delta$  173.08, 167.95, 147.23, 143.23, 142.79, 142.14, 139.35, 136.77, 132.16, 130.96 (2C), 130.61 (2C), 130.31 (2C), 129.86 (2C), 129.67, 124.96, 123.00, 55.20, 15.91. HRMS (ESI): calcd for  $\text{C}_{22}\text{H}_{16}\text{N}_4\text{O}_5$   $\{[\text{M}+\text{H}]^+\}$ , 417.1193; found, 417.1195.

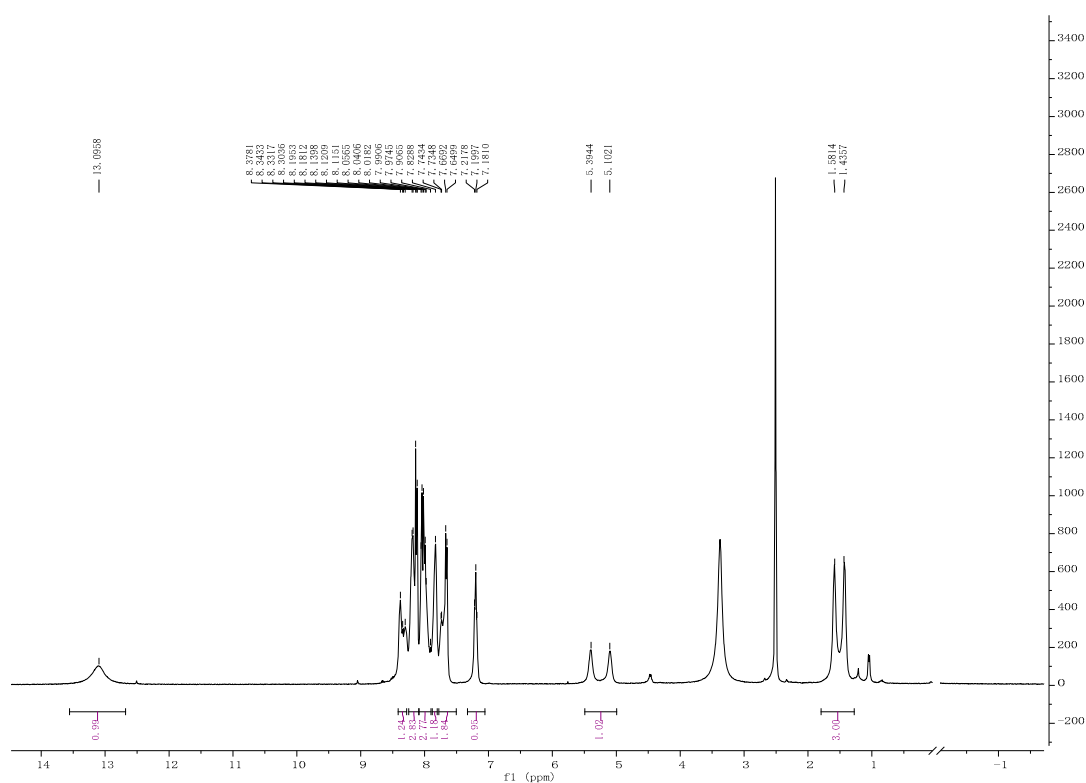

The  $^1\text{H}$  NMR spectrogram of compound **F16**



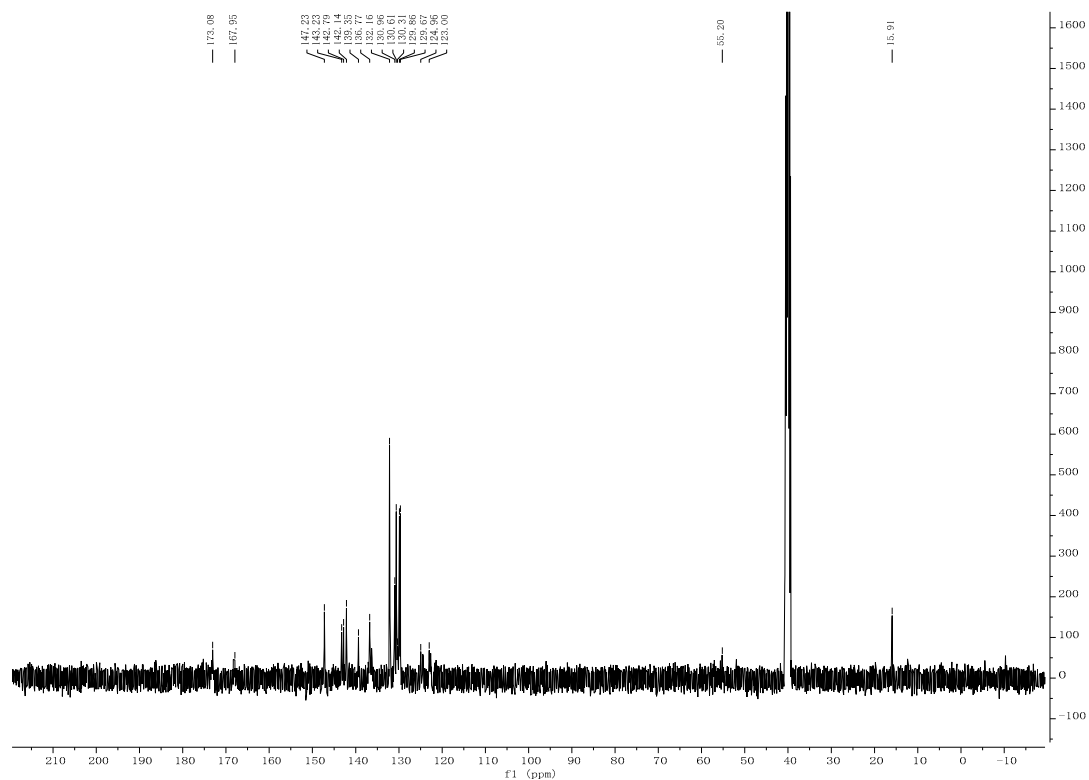

The  $^{13}\text{C}$  NMR spectrogram of compound **F16**

Y8 #93 RT: 0.50 AV: 1 NL: 1.23E10  
T: FTMS + p ESI Full ms [150.0000-1500.0000]

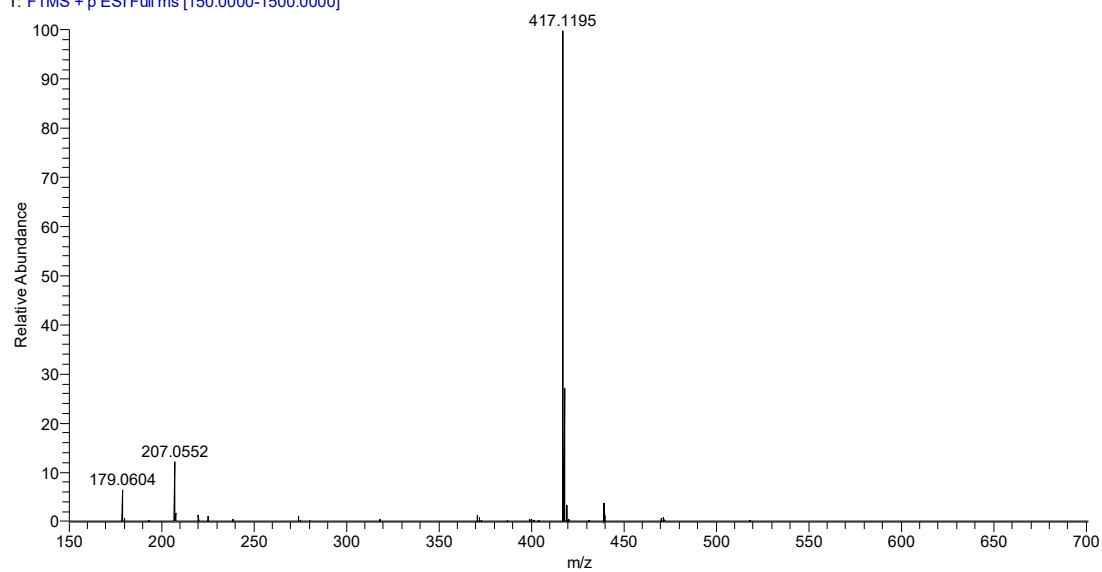

The HRMS spectrogram of compound **F16**

Compound **E1**, methyl *N*-(phenazine-1-carbonyl)-*N*-phenylalaninate

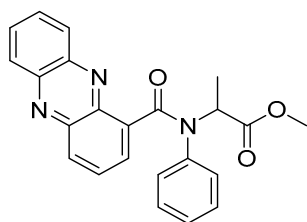

Yellow solid, yield 83.2%, m.p. 150.4-152.1°C;  $^1\text{H}$  NMR (400 MHz,  $\text{CDCl}_3$ )  $\delta$  8.37 (d,  $J = 9.5$  Hz, 1H), 8.21 (d,  $J = 9.4$  Hz, 1H), 8.07 (d,  $J = 8.6$  Hz, 1H), 7.88 (p,  $J = 6.8$  Hz, 2H), 7.73 – 7.60 (m, 2H), 7.29 – 7.22 (m, 2H), 6.91 (s, 3H), 5.60 (s, 1H), 3.94 (s, 3H), 1.60 (d,  $J = 25.7$  Hz, 3H).  $^{13}\text{C}$  NMR (101 MHz,  $\text{CDCl}_3$ )  $\delta$  169.00, 162.78, 143.37, 143.26, 142.47, 140.41, 137.20, 130.82, 130.52 (2C), 130.36 (2C), 130.19, 129.57 (2C), 129.30, 129.00, 128.33, 127.79 (2C), 52.42, 33.57, 15.58. HRMS (ESI): calcd for  $\text{C}_{23}\text{H}_{19}\text{N}_3\text{O}_3$   $\{[\text{M}+\text{H}]^+\}$ , 386.1499; found, 386.1499.

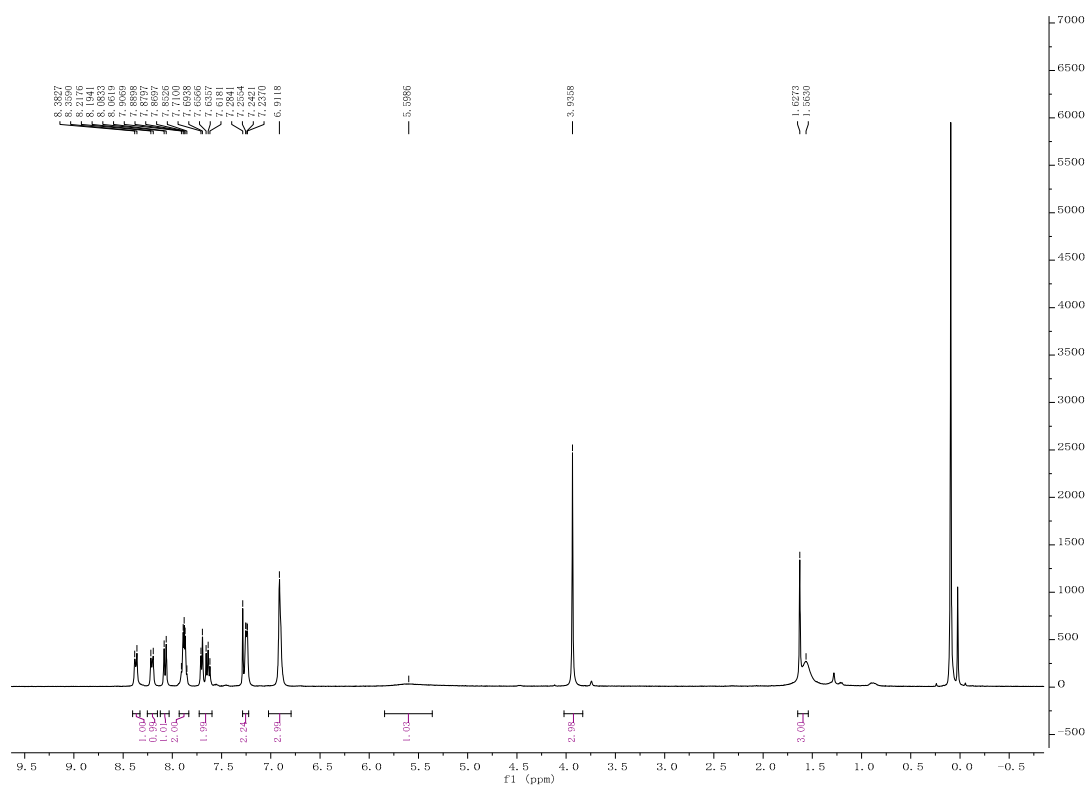

The  $^1\text{H}$  NMR spectrogram of compound **E1**

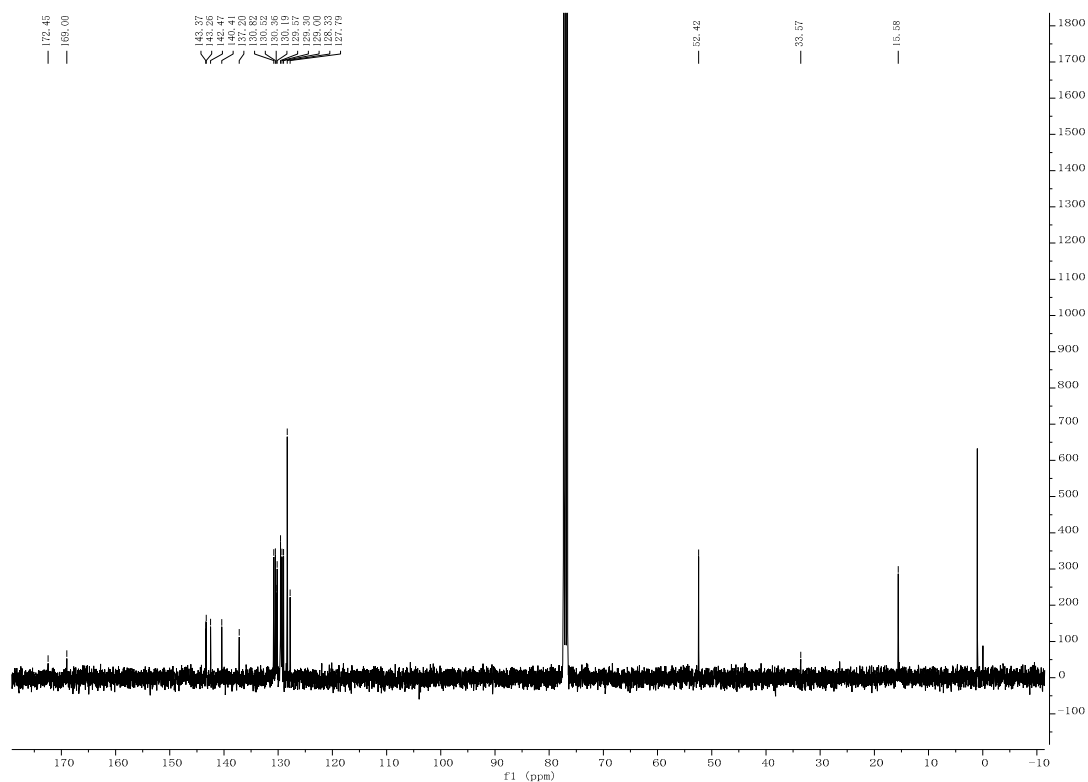

The  $^{13}\text{C}$  NMR spectrogram of compound **E1**

W1 #94 RT: 0.51 AV: 1 NL: 1.47E10  
T: FTMS + p ESI Full ms [150.0000-1500.0000]

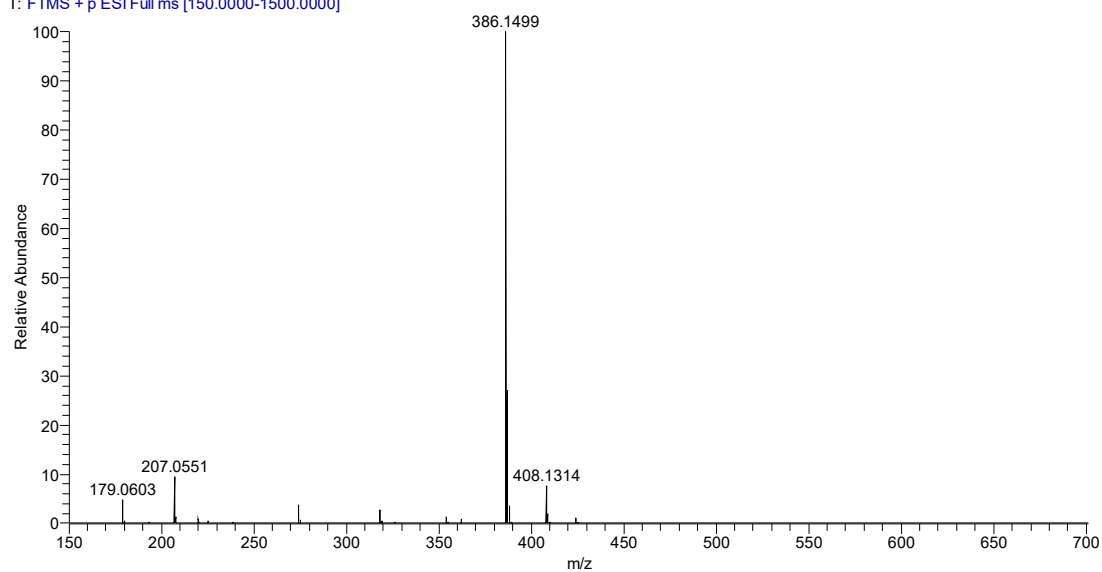

The HRMS spectrogram of compound **E1**

Compound **E2**, methyl *N*-(2-fluorophenyl)-*N*-(phenazine-1-carbonyl)alaninate

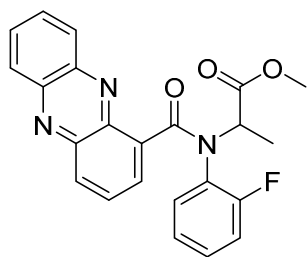

Yellow solid, yield 82.1%, m.p. 142.1-143.9°C;  $^1\text{H}$  NMR (400 MHz,  $\text{DMSO}-d_6$ )  $\delta$  8.35 – 8.25 (m, 1H), 8.16 (dd,  $J = 24.2, 7.9$  Hz, 2H), 8.02 (d,  $J = 27.1$  Hz, 2H), 7.86 (s, 2H), 7.38 (s, 1H), 6.95 (s, 2H), 6.59 (s, 1H), 5.22 (1H, two isomers), 3.85 (d,  $J = 25.6$  Hz, 3H), 1.62 (3H, two isomers).  $^{13}\text{C}$  NMR (101 MHz,  $\text{DMSO}-d_6$ )  $\delta$  171.72, 168.20, 165.14, 162.90(dd,  $\text{C}=\text{C}-\text{F} = J = 226.24$  Hz), 143.19, 142.74, 142.01, 139.59, 136.57, 132.08, 131.46 (2C), 131.05 (2C), 1+30.92, 130.53 (2C), 129.86, 129.71, 124.31, 116.07, 55.23, 52.76, 15.04. HRMS (ESI): calcd for  $\text{C}_{23}\text{H}_{18}\text{FN}_3\text{O}_3$   $\{[\text{M}+\text{H}]^+\}$ , 404.1405; found, 404.1406.

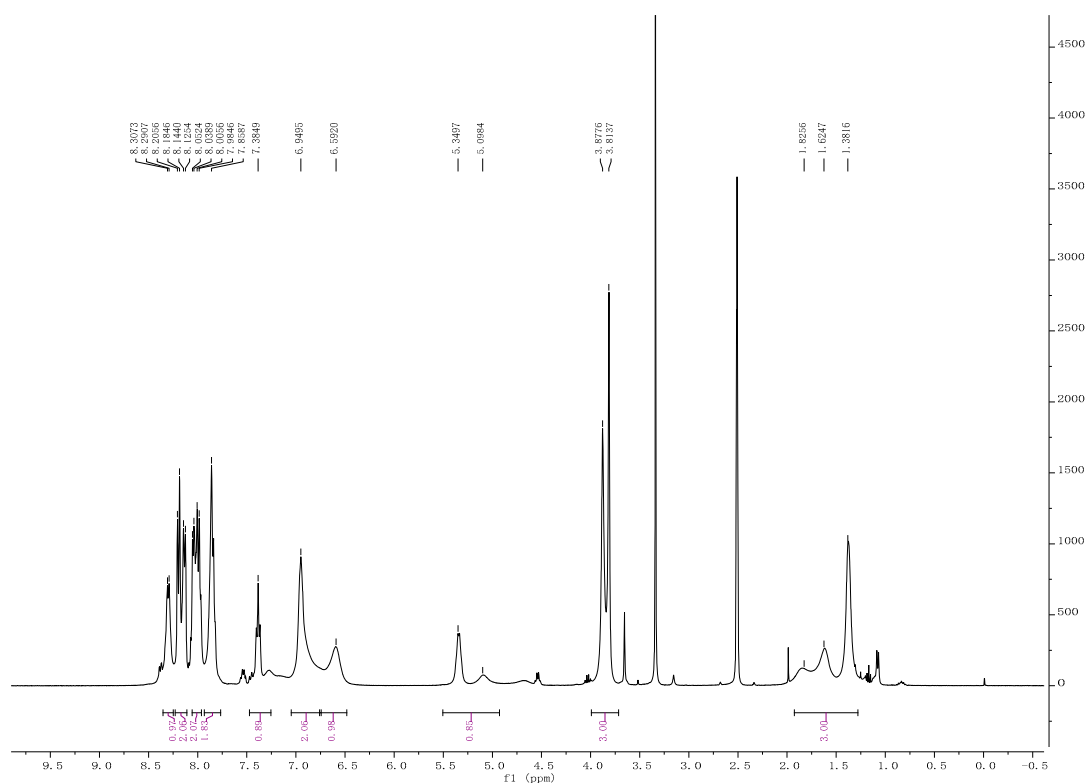

The  $^1\text{H}$  NMR spectrogram of compound **E2**



CC(=O)N(c1ccc(F)cc1)C(=O)c2cc3nc4ccccc4nc3cc2

Chemical shifts (ppm): 8.3314, 8.2321, 8.1743, 8.1446, 8.1296, 8.0952, 8.0483, 8.0443, 8.0400, 8.0275, 8.0252, 8.0027, 7.9951, 7.8578, 7.8410, 7.7825, 7.7650, 7.7109, 7.7074, 7.6948, 6.9311, 6.7096.

Integration values: 1.02, 0.97, 0.94, 2.00, 1.02, 0.94, 0.90, 1.06, 2.94, 3.00.

3

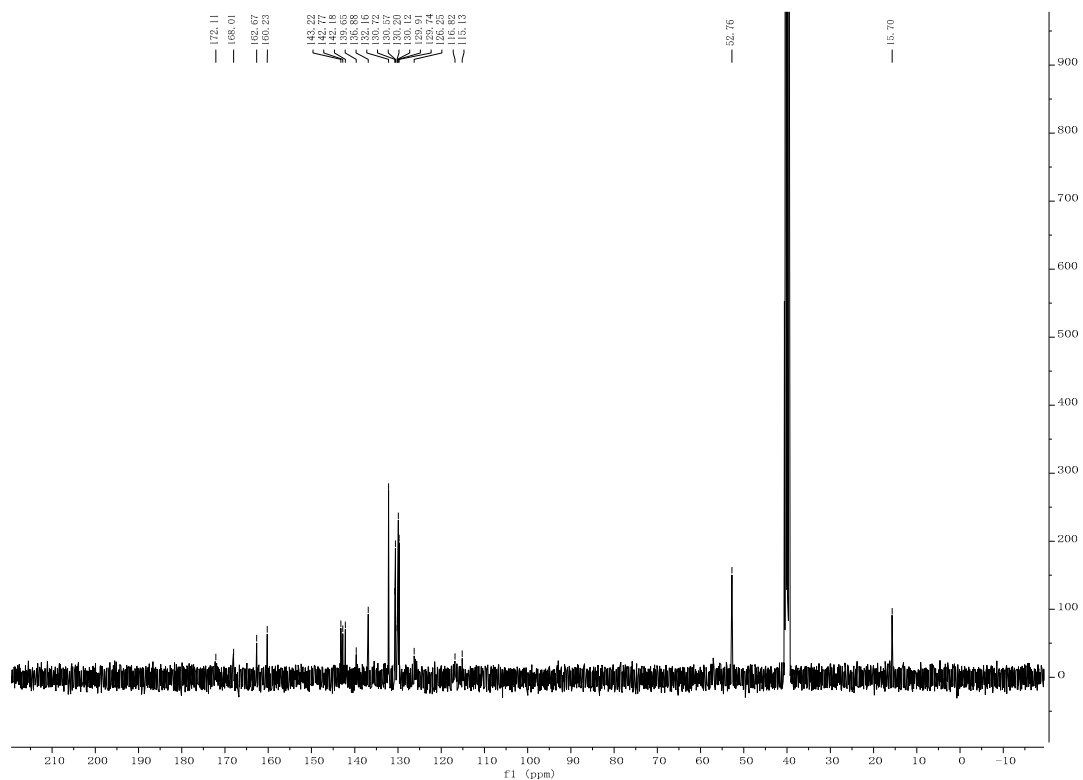

The  $^{13}\text{C}$  NMR spectrogram of compound **E3**

W6 #103 RT: 0.55 AV: 1 NL: 1.47E10  
T: FTMS + p ESI Full ms [150.0000-1500.0000]

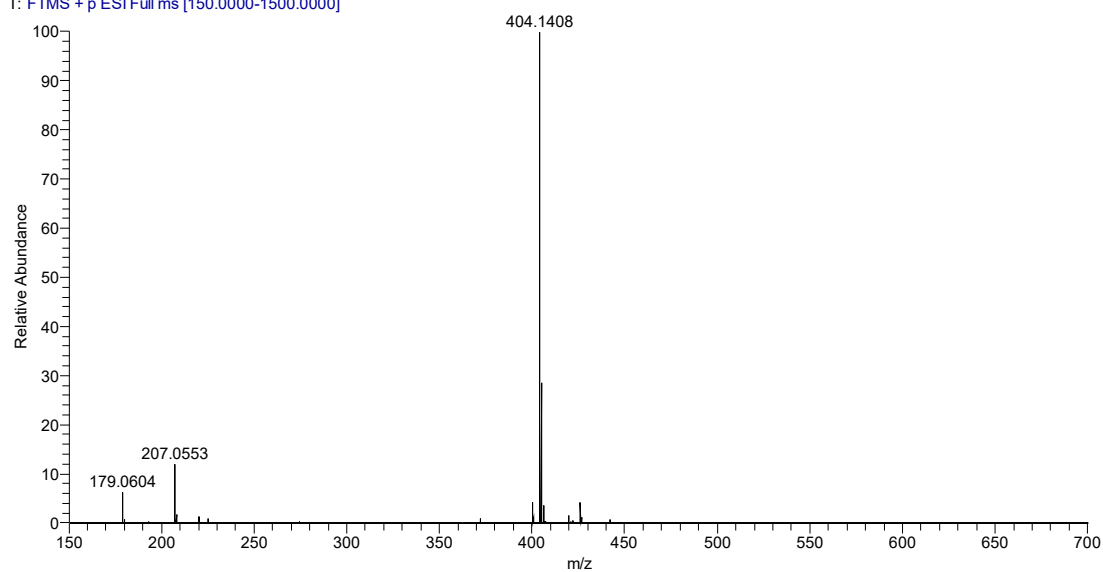

The HRMS spectrogram of compound **E3**

CC(C)OC(=O)N(C(=O)c1ccc(F)cc1)c2ccc3nc4ccccc4nc32[illegible]

4



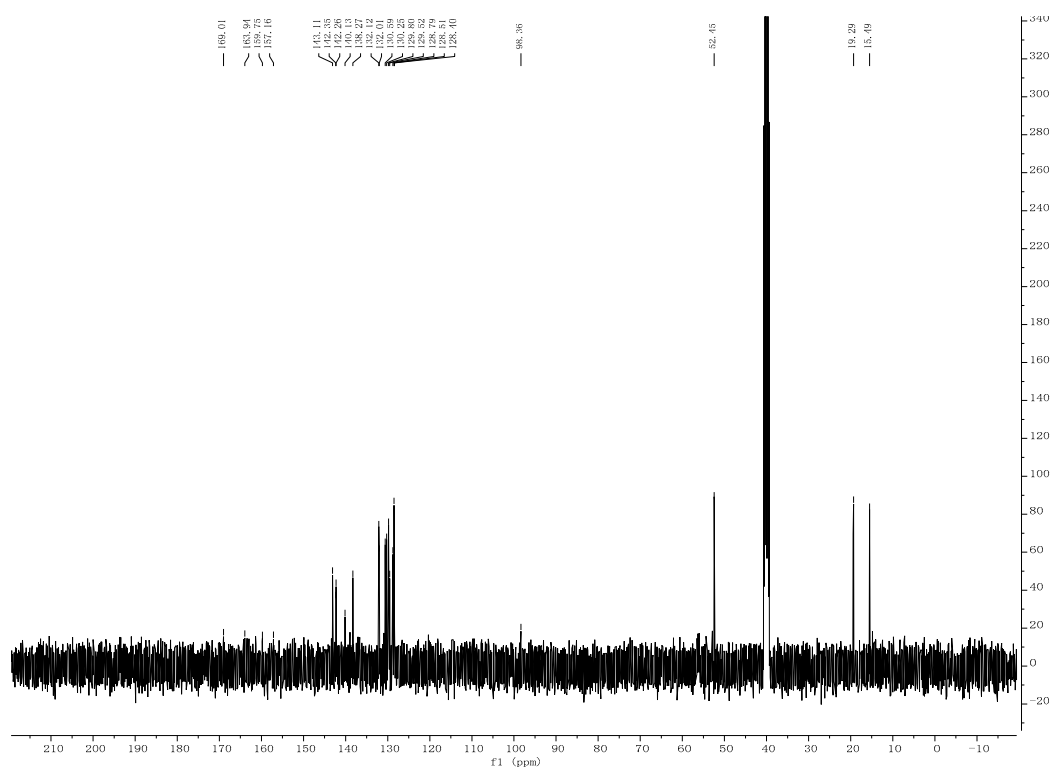

The  $^{13}\text{C}$  NMR spectrogram of compound **E4**

W14

POS\_W14 485 (2.746) AM (Cen,4, 80.00, Ar.10000.0.0.00,0.00); Cm (485:490)

1: TOF MS ES+  
3.18e6

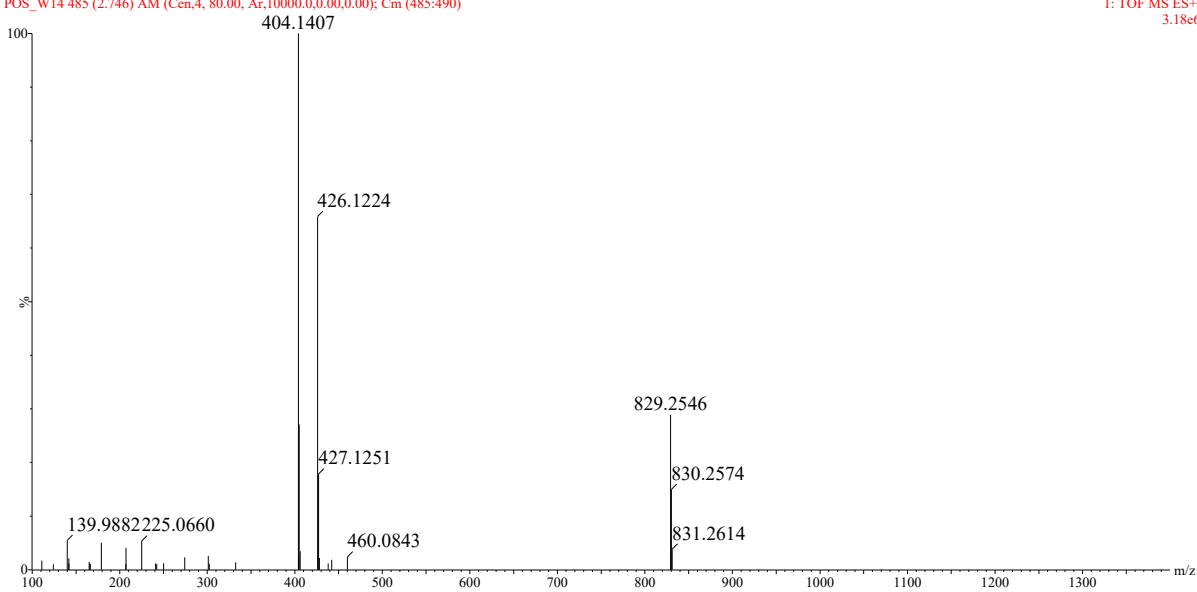

The HRMS spectrogram of compound **E4**

Compound **E5**,  
methyl *N*-(2-chlorophenyl)-*N*-(phenazine-1-carbonyl)alaninate

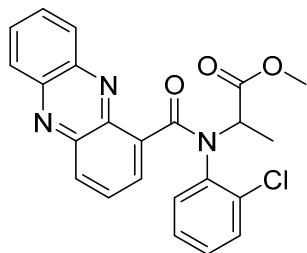

Yellow solid, yield 80.1%, m.p. 144.7-146.6°C;  $^1\text{H}$  NMR (400 MHz,  $\text{DMSO}-d_6$ )  $\delta$  8.32 (s, 1H), 8.23 (d,  $J = 8.4$  Hz, 1H), 8.14 (d,  $J = 10.1$  Hz, 1H), 8.02 (dddd,  $J = 14.3$ , 7.9, 6.6, 1.5 Hz, 2H), 7.93 – 7.75 (m, 2H), 7.24 (d,  $J = 8.1$  Hz, 2H), 7.01 (d,  $J = 8.1$  Hz, 2H), 5.22 (1H, two isomers), 3.84 (s, 3H), 1.50 (3H, two isomers).  $^{13}\text{C}$  NMR (101 MHz,  $\text{DMSO}-d_6$ )  $\delta$  172.19, 168.24, 143.28, 142.83, 142.21, 139.70, 136.95, 132.13, 131.31, 130.65 (2C), 130.56 (2C), 129.99 (2C), 129.75 (2C), 128.79 (2C), 128.20, 52.75, 49.18, 15.75. HRMS (ESI): calcd for  $\text{C}_{23}\text{H}_{18}\text{ClN}_3\text{O}_3$   $\{[\text{M}+\text{H}]^+\}$ , 420.1109; found, 420.1113.

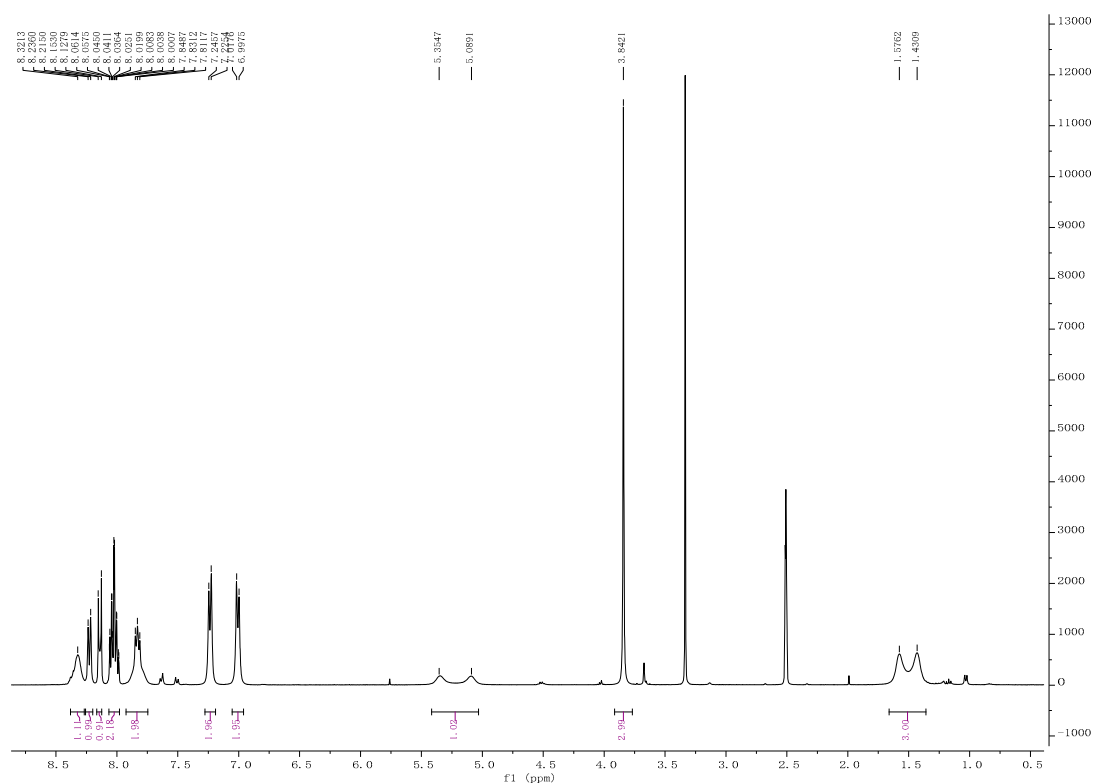

The  $^1\text{H}$  NMR spectrogram of compound **E5**

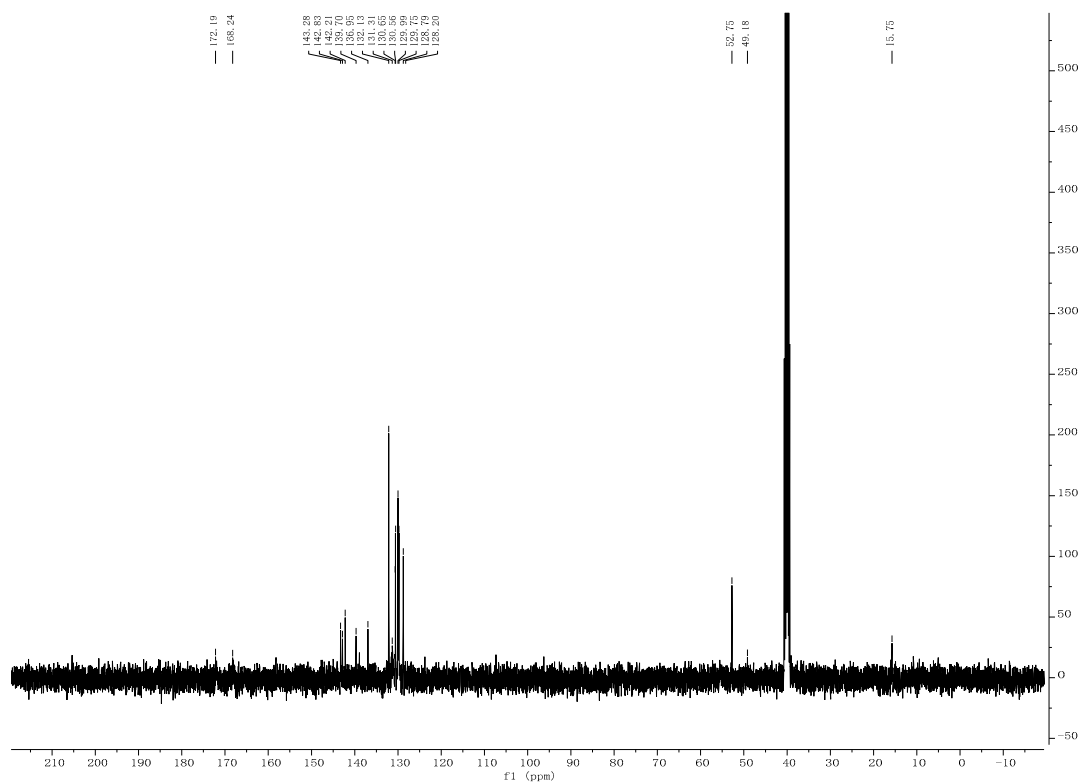

The  $^{13}\text{C}$  NMR spectrum of compound **E5**

Y10 #120 RT: 0.64 AV: 1 NL: 1.10E10  
T: FTMS + p ESI Full ms [150.0000-1500.0000]

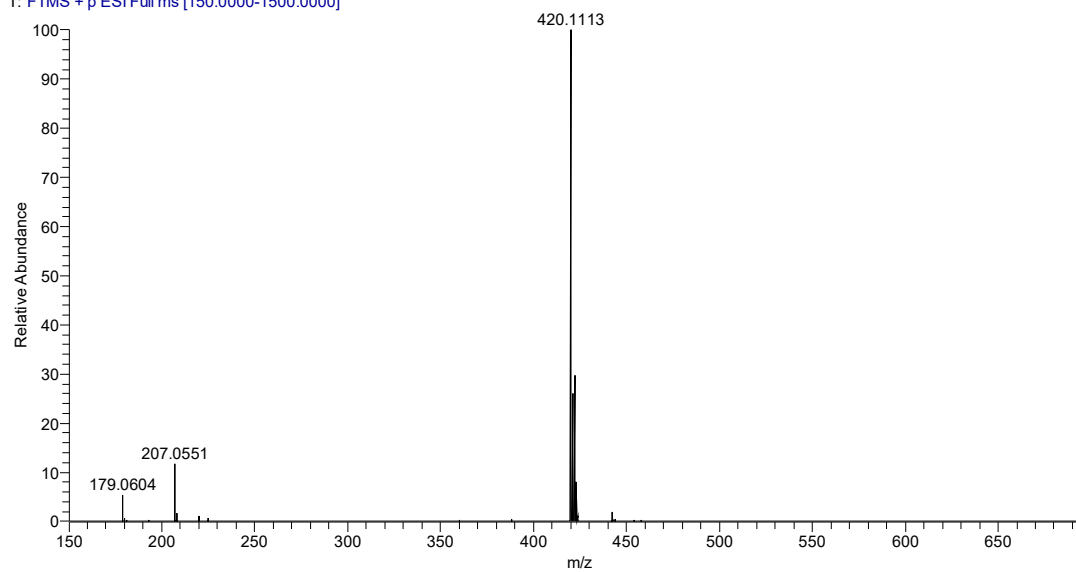

The HRMS spectrum of compound **E5**

Compound **E6**,  
methyl *N*-(3-chlorophenyl)-*N*-(phenazine-1-carbonyl)alaninate

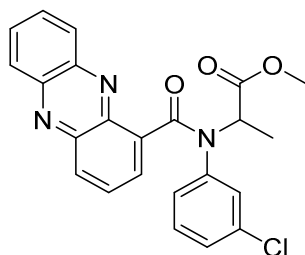

Yellow solid, yield 81.0%, m.p. 144.7-146.6°C;  $^1\text{H}$  NMR (400 MHz,  $\text{DMSO}-d_6$ )  $\delta$  8.34 (s, 1H), 8.21 (d,  $J = 8.3$  Hz, 1H), 8.14 (d,  $J = 9.8$  Hz, 1H), 8.02 (dt,  $J = 15.7, 6.7$  Hz, 2H), 7.96 – 7.78 (m, 2H), 7.37 (s, 1H), 7.14 (d,  $J = 7.1$  Hz, 1H), 6.93 (d,  $J = 6.4$  Hz, 2H), 5.21 (1H, two isomers), 3.85 (s, 3H), 1.53 (3H, two isomers).  $^{13}\text{C}$  NMR (101 MHz,  $\text{DMSO}-d_6$ )  $\delta$  171.95, 168.14, 143.22, 142.76, 142.16, 142.11, 139.51, 136.86, 134.79, 132.56, 132.13 (2C), 130.80, 130.56, 130.08, 129.90, 129.71, 128.22, 123.02, 119.83, 57.02, 52.75, 15.76. HRMS (ESI): calcd for  $\text{C}_{23}\text{H}_{18}\text{ClN}_3\text{O}_3$   $\{[\text{M}+\text{H}]^+\}$ , 420.1109; found, 420.1110.

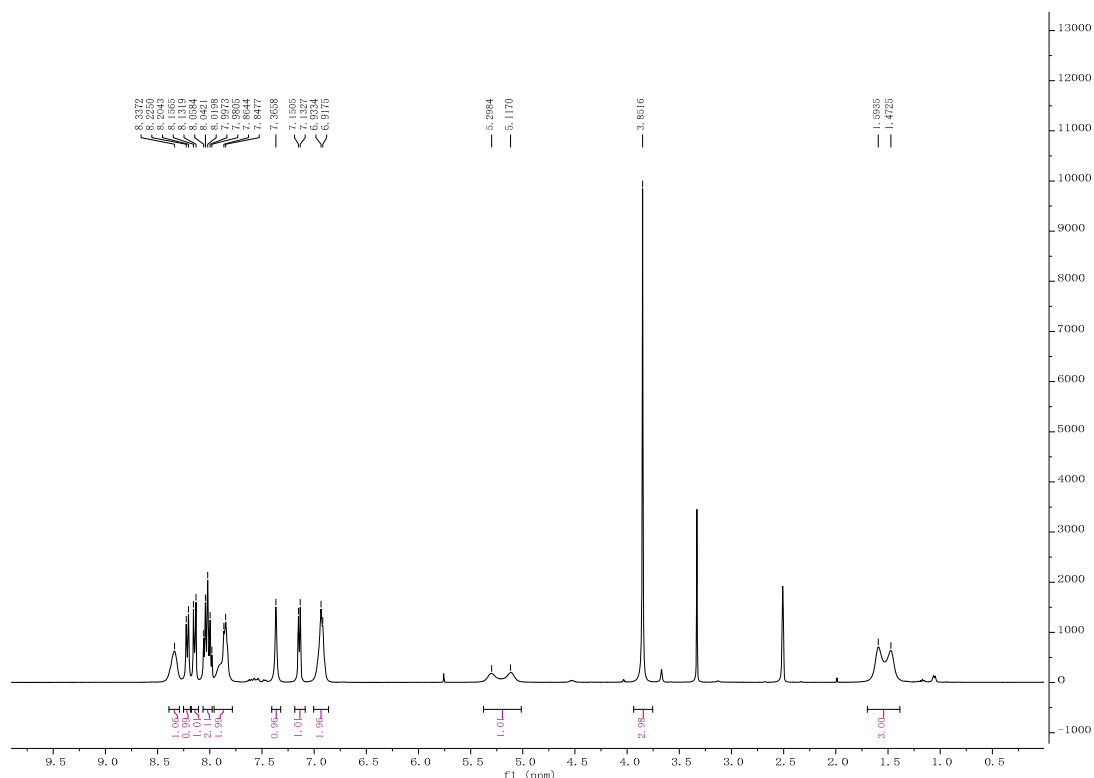

The  $^1\text{H}$  NMR spectrogram of compound **E6**

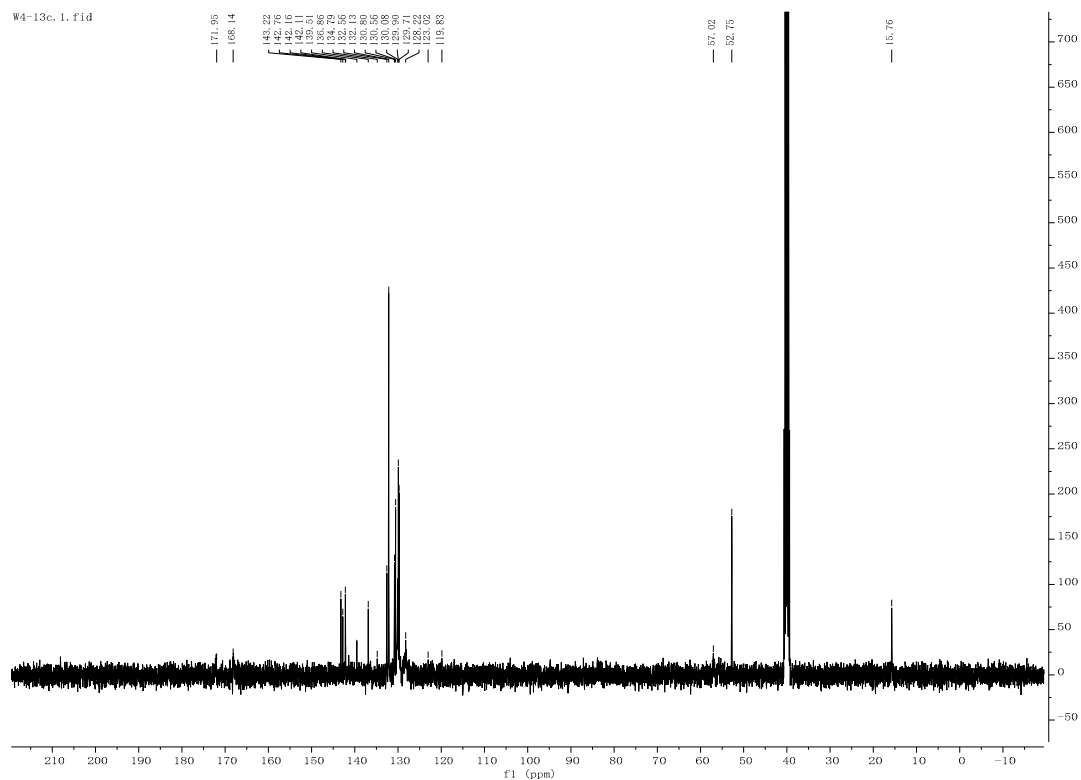

The  $^{13}\text{C}$  NMR spectrogram of compound E6

W4 #114 RT: 0.61 AV: 1 NL: 1.20E10  
T: FTMS + p ESI Full ms [150.0000-1500.0000]

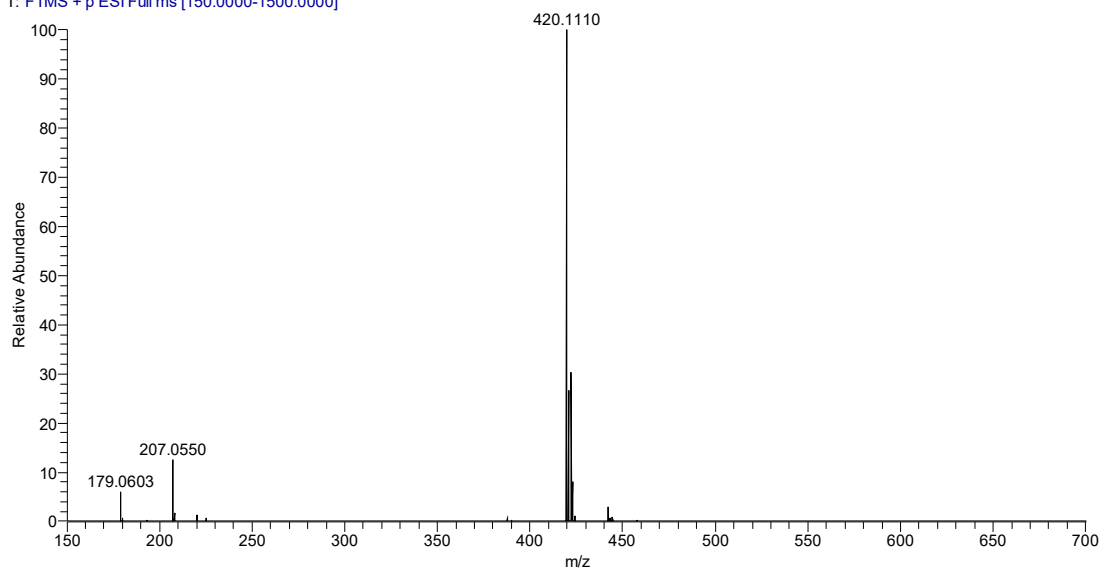

The HRMS spectrogram of compound E6

CC(=O)N(C(=O)c1ccc(Cl)cc1)c2cc3ccccc3nc2

4

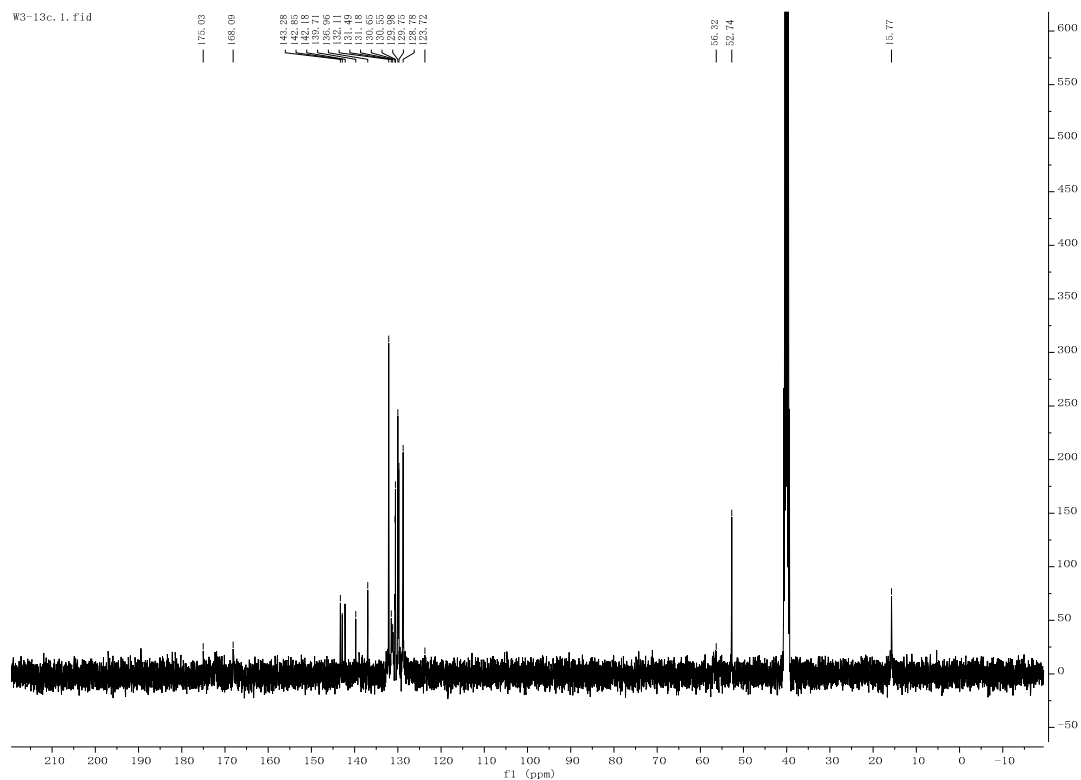

The  $^{13}\text{C}$  NMR spectrogram of compound **E7**

W3 #113 RT: 0.60 AV: 1 NL: 1.13E10  
T: FTMS + p ESI Full ms [150.0000-1500.0000]

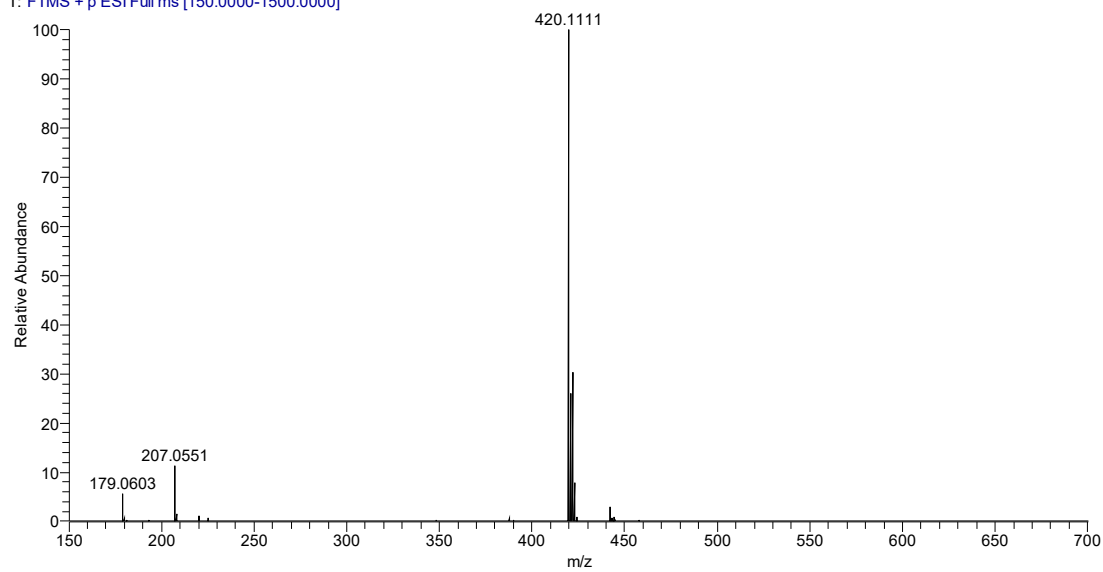

The HRMS spectrogram of compound **E7**

Compound **E8**,  
methyl *N*-(3-bromophenyl)-*N*-(phenazine-1-carbonyl)alaninate

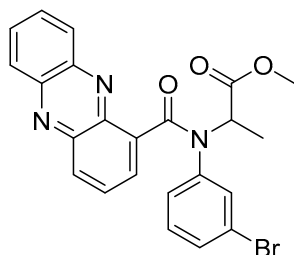

Yellow solid, yield 77.9%, m.p. 135.0-137.0°C;  $^1\text{H}$  NMR (400 MHz,  $\text{DMSO}-d_6$ )  $\delta$  8.39 – 8.30 (m, 1H), 8.22 (d,  $J = 8.3$  Hz, 1H), 8.14 (d,  $J = 10.0$  Hz, 1H), 8.06 – 7.98 (m, 2H), 7.94 – 7.78 (m, 2H), 7.50 (s, 1H), 7.26 – 7.14 (m, 1H), 7.07 (s, 1H), 6.86 (t,  $J = 7.5$  Hz, 1H), 5.20 (1H, two isomers), 3.85 (s, 3H), 1.53 (3H, two isomers).  $^{13}\text{C}$  NMR (101 MHz,  $\text{DMSO}-d_6$ )  $\delta$  172.22, 168.12, 143.22, 142.75, 142.15, 139.51, 136.86, 132.14 (2C), 131.05, 130.81, 130.56, 130.35, 129.93, 129.71, 128.59, 120.77, 57.00, 52.76, 15.75. HRMS (ESI): calcd for  $\text{C}_{23}\text{H}_{18}\text{BrN}_3\text{O}_3$   $\{[\text{M}+\text{H}]^+\}$ , 464.0605; found, 464.0607.

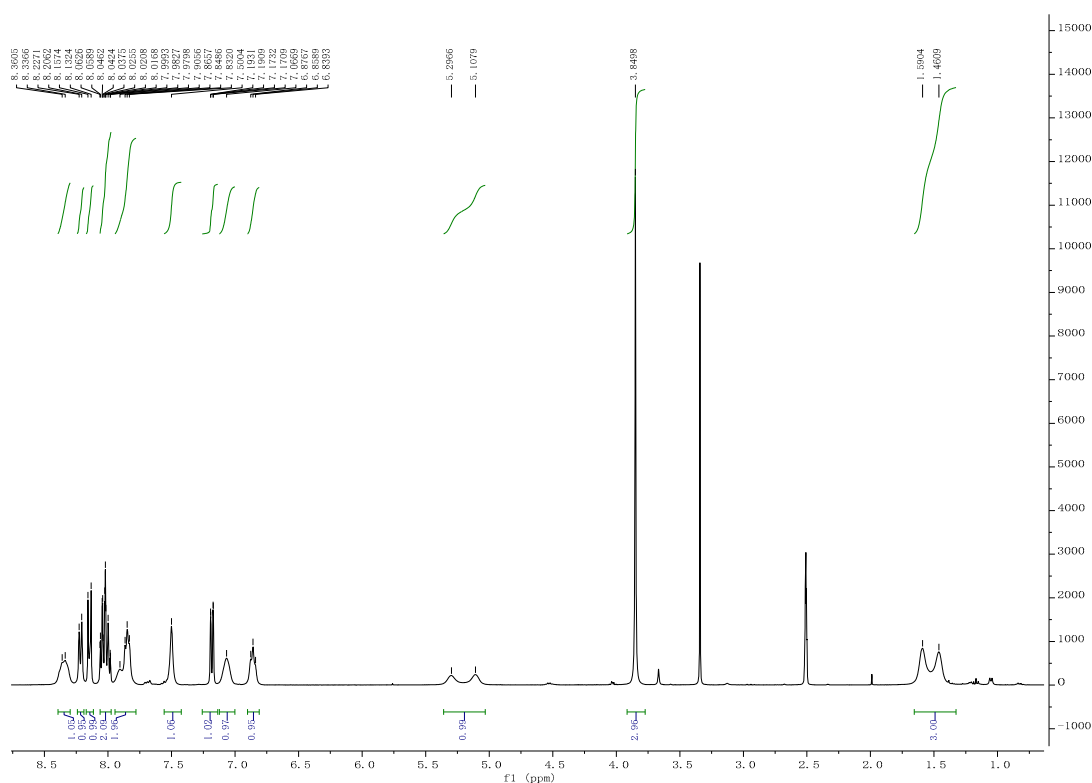

The  $^1\text{H}$  NMR spectrogram of compound **E8**



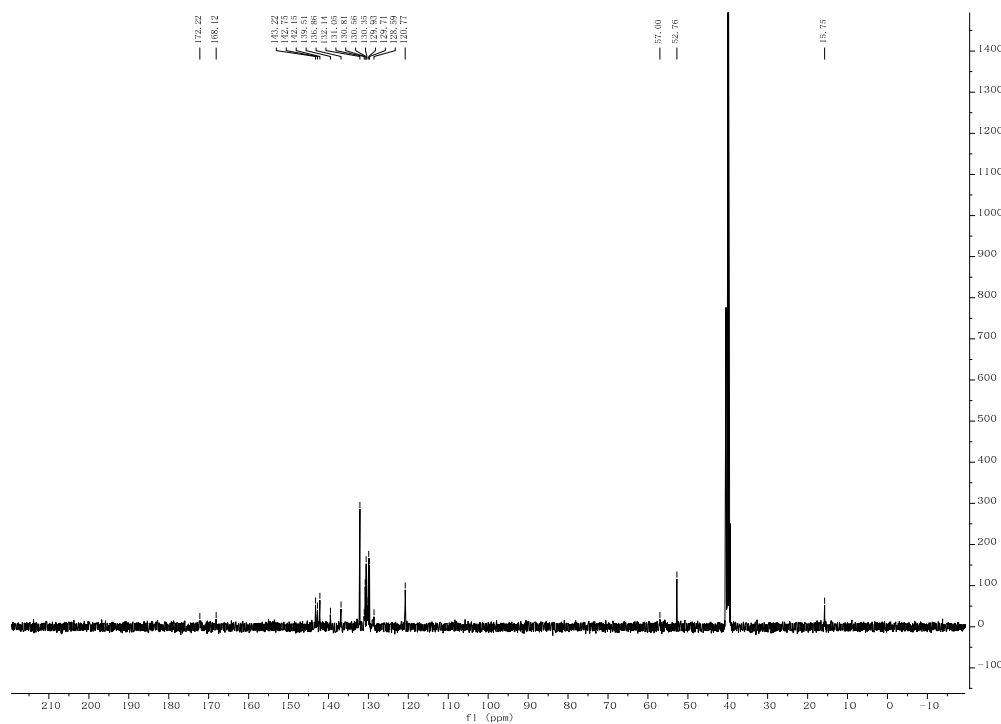

The <sup>13</sup>C NMR spectrogram of compound **E8**

W13

POS\_W13 510 (2.898) AM (Cen,4, 80.00, Ar,10000.0,0.00,0.00); Cm (510:512)

1: TOF MS ES+  
4.38e6

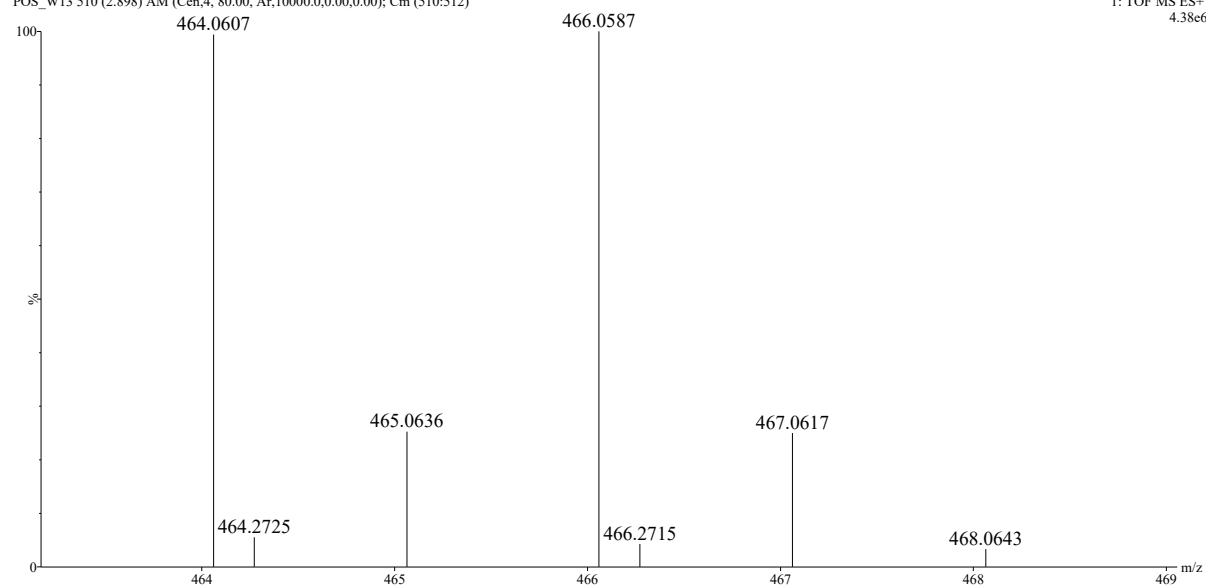

The HRMS spectrogram of compound **E8**

Compound **E9**,  
methyl *N*-(4-bromophenyl)-*N*-(phenazine-1-carbonyl)alaninate

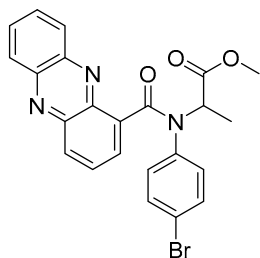

Yellow solid, yield 80.4%, m.p. 1172.0-173.8°C;  $^1\text{H}$  NMR (400 MHz, DMSO- $d_6$ )  $\delta$  8.32 (s, 1H), 8.22 (d,  $J$  = 8.0 Hz, 1H), 8.14 (d,  $J$  = 10.1 Hz, 1H), 8.06 – 7.98 (m, 2H), 7.89 – 7.75 (m, 2H), 7.16 (q,  $J$  = 8.7 Hz, 4H), 5.21 (1H, two isomers), 3.84 (s, 3H), 1.51 (3H, two isomers).  $^{13}\text{C}$  NMR (101 MHz, DMSO- $d_6$ )  $\delta$  167.93, 166.12, 143.29, 142.85, 142.21, 139.72, 136.93, 135.18, 132.12 (2C), 131.76, 131.37 (2C), 130.66 (2C), 130.56, 129.99, 129.75 (2C), 85.78, 52.74, 15.70. HRMS (ESI): calcd for  $\text{C}_{23}\text{H}_{18}\text{BrN}_3\text{O}_3$   $\{[\text{M}+\text{H}]^+\}$ , 464.0604; found, 464.0612.

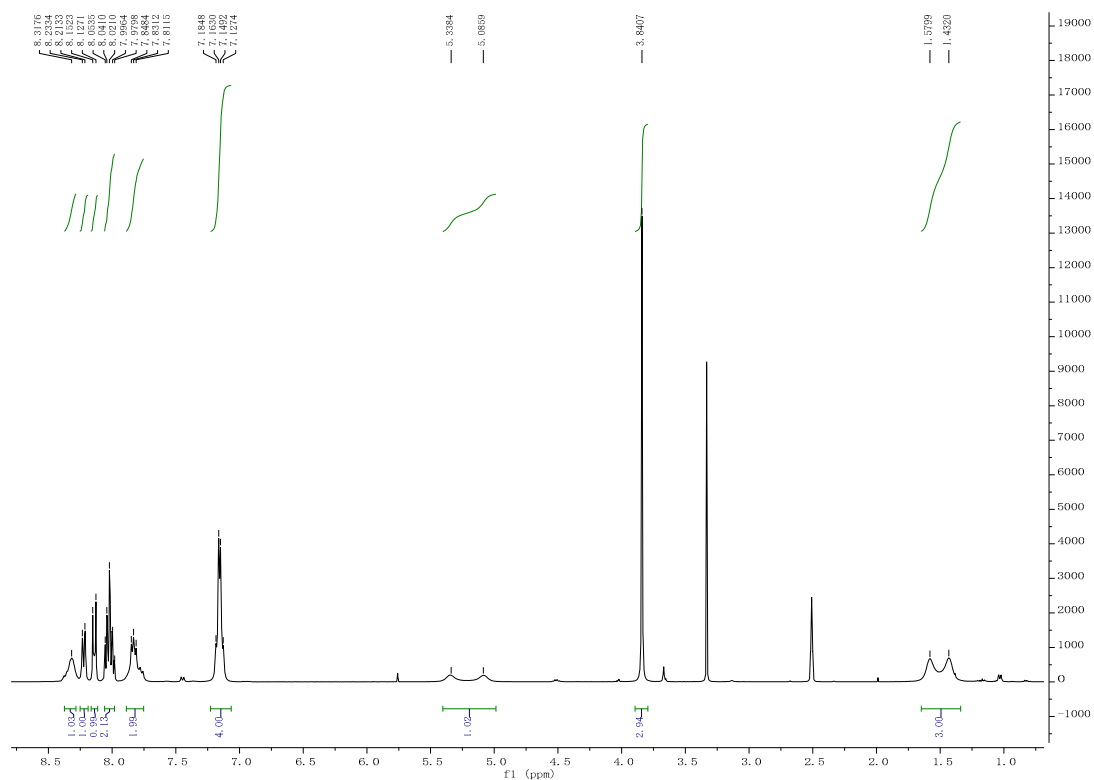

The  $^1\text{H}$  NMR spectrogram of compound **E9**

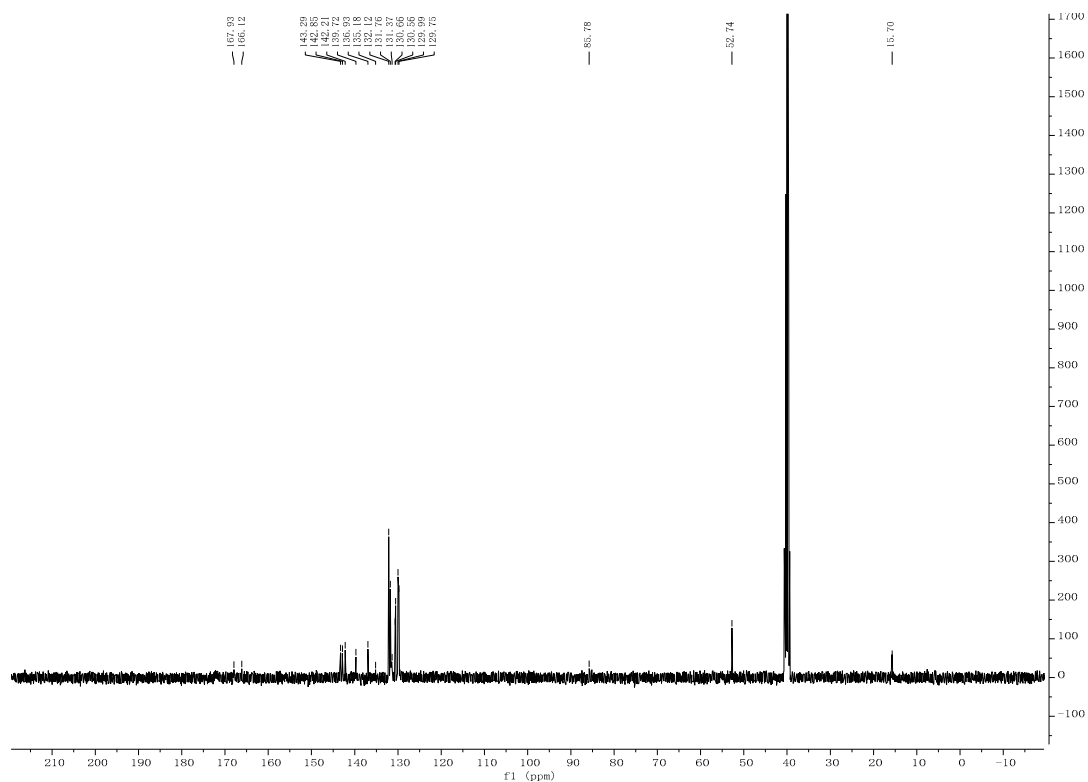

The  $^{13}\text{C}$  NMR spectrogram of compound **E9**

W9 #112 RT: 0.59 AV: 1 NL: 7.14E9  
T: FTMS + p ESI Full ms [150.0000-1500.0000]

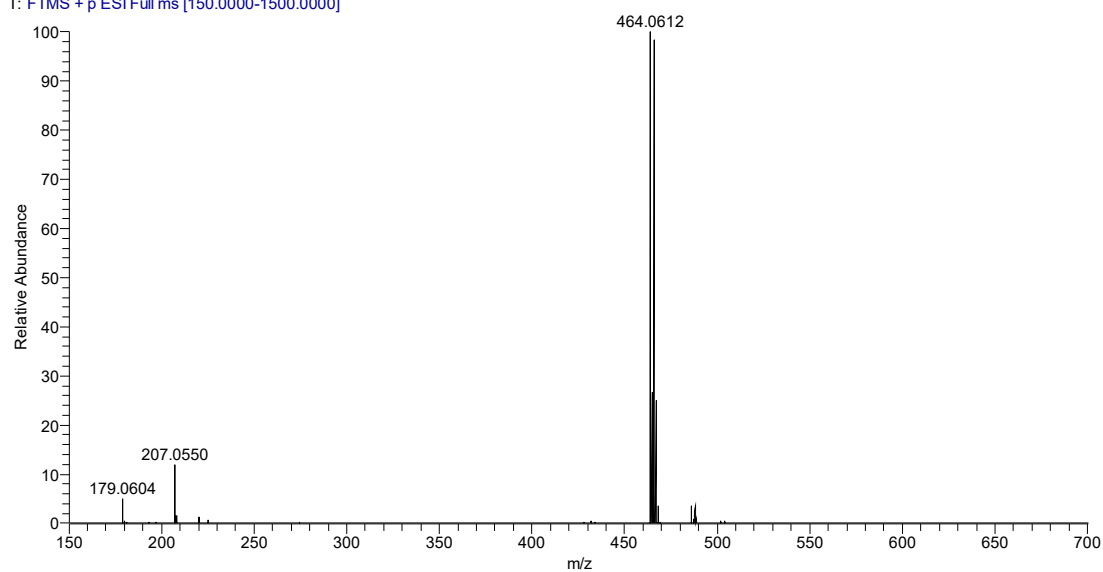

The HRMS spectrogram of compound **E9**

Compound **E10**,  
methyl *N*-(phenazine-1-carbonyl)-*N*-(*m*-tolyl)alaninate

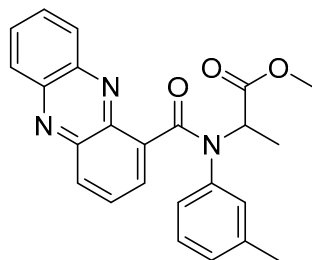

Brown solid, yield 81.1%, m.p. 168.3-170.1°C;  $^1\text{H}$  NMR (400 MHz,  $\text{DMSO-}d_6$ )  $\delta$  8.34 (d,  $J = 7.0$  Hz, 1H), 8.20 (d,  $J = 8.0$  Hz, 1H), 8.13 – 8.06 (m, 1H), 8.05 – 7.96 (m, 2H), 7.81 (s, 2H), 7.10 (s, 1H), 6.93 (d,  $J = 7.9$  Hz, 1H), 6.74 (t,  $J = 7.6$  Hz, 1H), 6.67 (s, 1H), 5.17 (1H, two isomers), 3.84 (s, 3H), 1.81 (s, 3H), 1.52 (3H, two isomers).  $^{13}\text{C}$  NMR (101 MHz,  $\text{DMSO-}d_6$ )  $\delta$ : 172.02, 168.19, 143.14, 142.73, 142.20, 139.80, 137.94, 137.39, 131.97, 130.50 (2C), 130.41 (2C), 129.89, 129.71 (2C), 128.30, 126.81, 120.84, 120.51, 52.64, 20.78, 15.76. HRMS (ESI): calcd for  $\text{C}_{24}\text{H}_{21}\text{N}_3\text{O}_3$   $\{[\text{M}+\text{H}]^+\}$ , 400.1656; found, 400.1657.

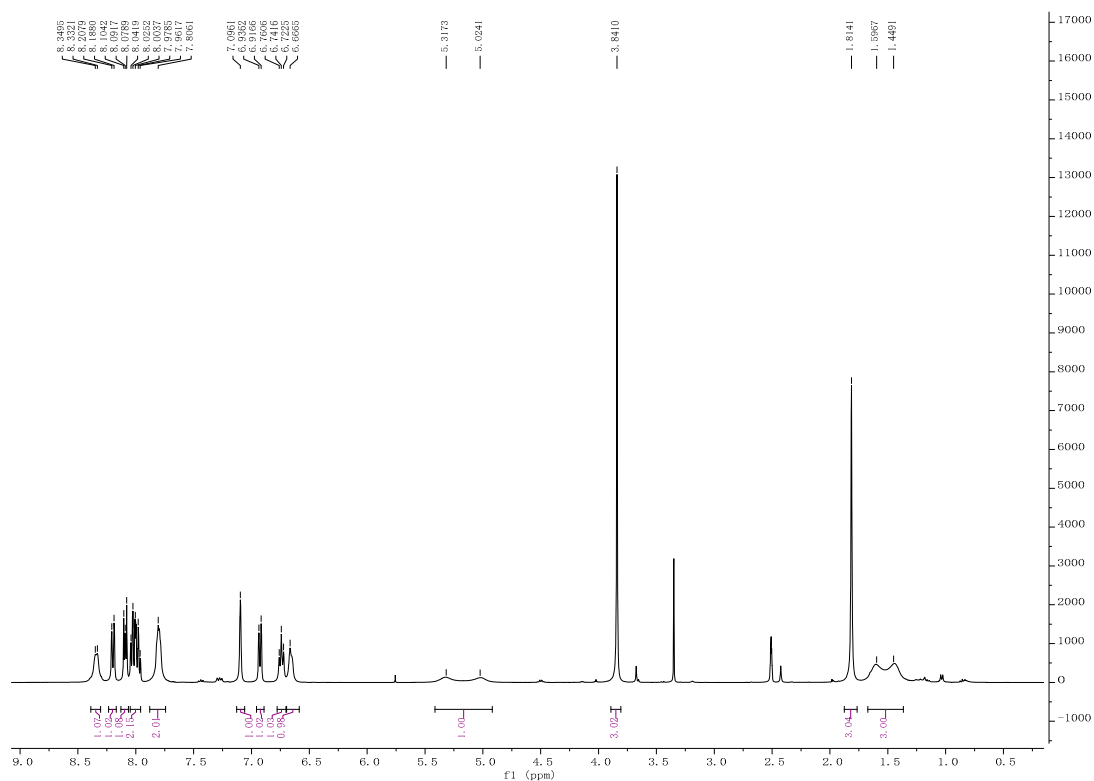

The  $^1\text{H}$  NMR spectrogram of compound **E10**

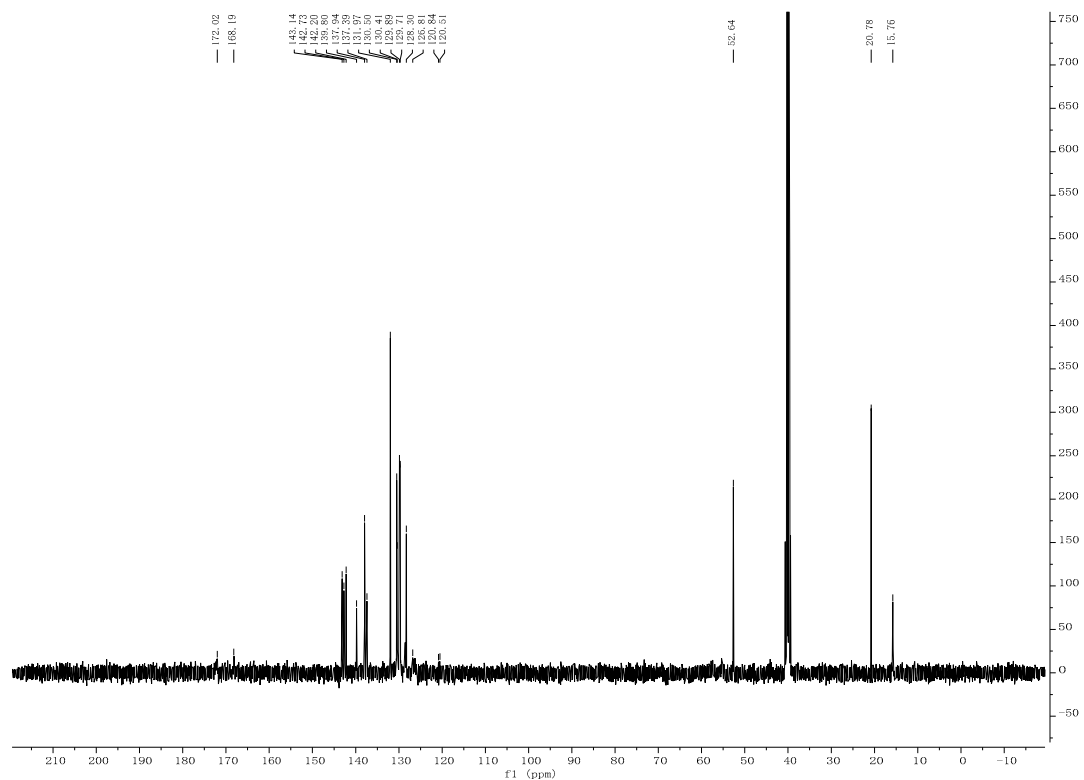

The  $^{13}\text{C}$  NMR spectrogram of compound **E10**

W5 #111 RT: 0.59 AV: 1 NL: 1.95E10  
T: FTMS + p ESI Full ms [150.0000-1500.0000]

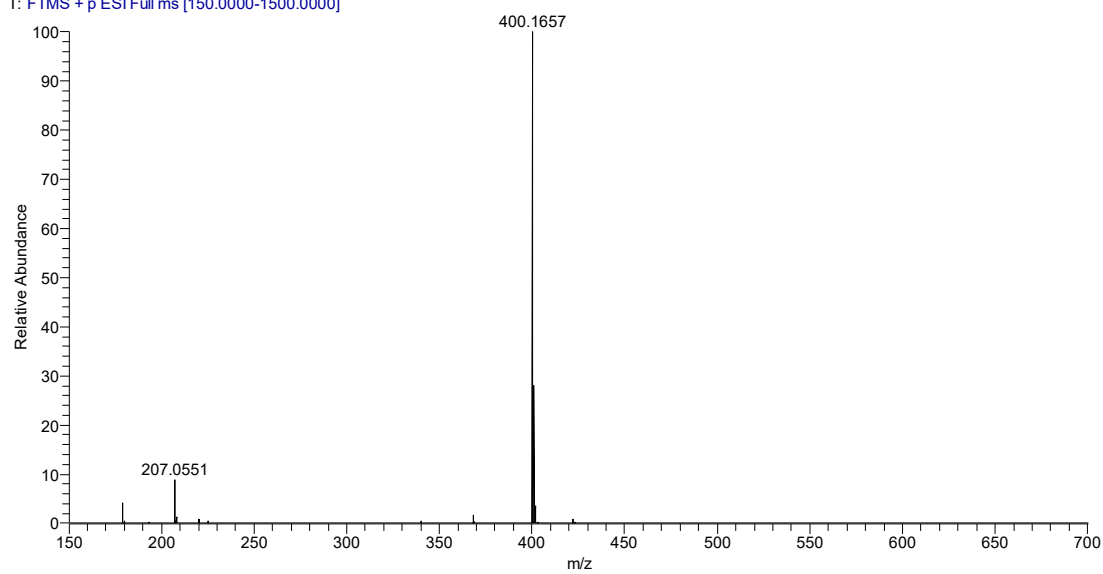

The HRMS spectrogram of compound **E10**

Compound **E11**,  
methyl N-(3-ethylphenyl)-N-(phenazine-1-carbonyl)alaninate

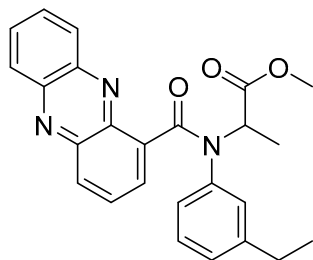

Yellow solid, yield 79.6%, m.p. 111.9-112.9°C;  $^1\text{H}$  NMR (400 MHz,  $\text{DMSO}-d_6$ )  $\delta$  8.34 (s, 1H), 8.19 (d,  $J = 8.4$  Hz, 1H), 8.10 – 7.95 (m, 3H), 7.87 – 7.70 (m, 2H), 7.00 (d,  $J = 8.5$  Hz, 2H), 6.83 (s, 1H), 6.66 (s, 1H), 5.37 (1H, two isomers), 3.84 (s, 3H), 2.06 (q,  $J = 7.5$  Hz, 2H), 1.52 (3H, two isomers), 0.38 (s, 3H).  $^{13}\text{C}$  NMR (101 MHz,  $\text{DMSO}-d_6$ )  $\delta$  171.99, 168.21, 144.17, 143.17, 142.78, 142.20, 139.83, 137.47, 131.94, 130.47, 130.33, 129.90, 129.68, 129.35, 129.15, 128.47 (2C), 127.58, 126.84, 126.56, 55.36, 52.63, 27.84, 15.79, 15.11. HRMS (ESI): calcd for  $\text{C}_{25}\text{H}_{23}\text{N}_3\text{O}_3$   $\{[\text{M}+\text{H}]^+\}$ , 414.1812; found, 414.1814.

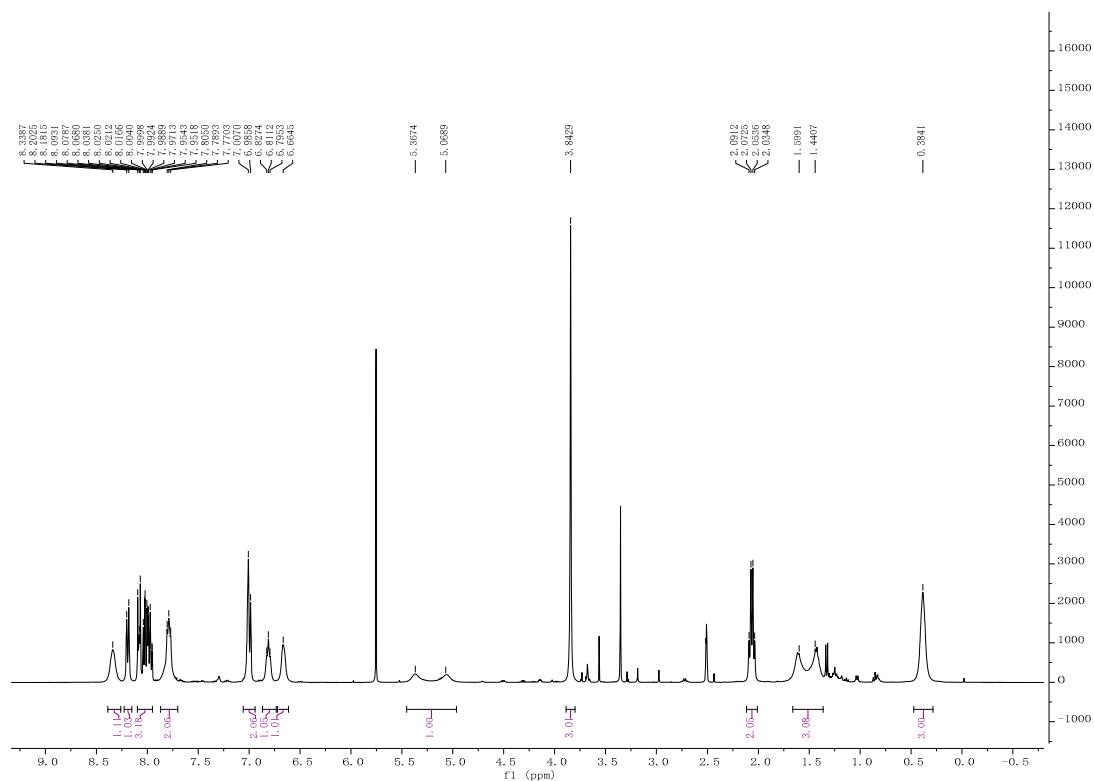

The  $^1\text{H}$  NMR spectrogram of compound **E11**

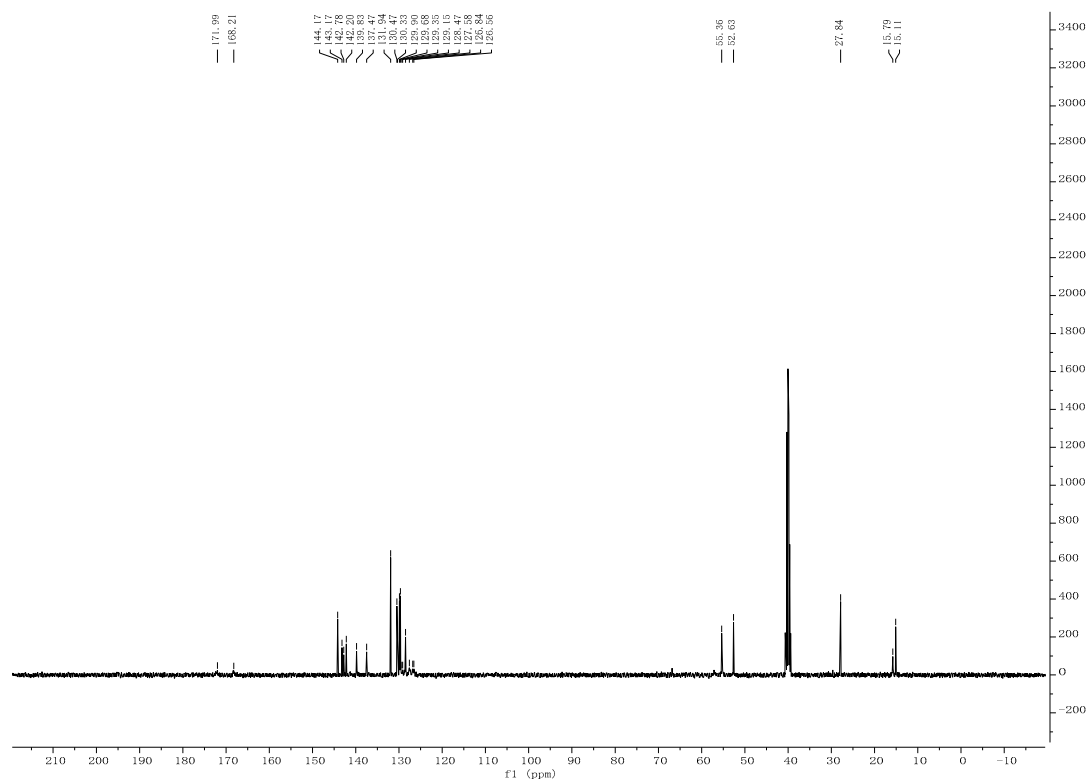

The  $^{13}\text{C}$  NMR spectrogram of compound **E11**

W7 #120 RT: 0.64 AV: 1 NL: 1.57E10  
T: FTMS + p ESI Full ms [150.0000-1500.0000]

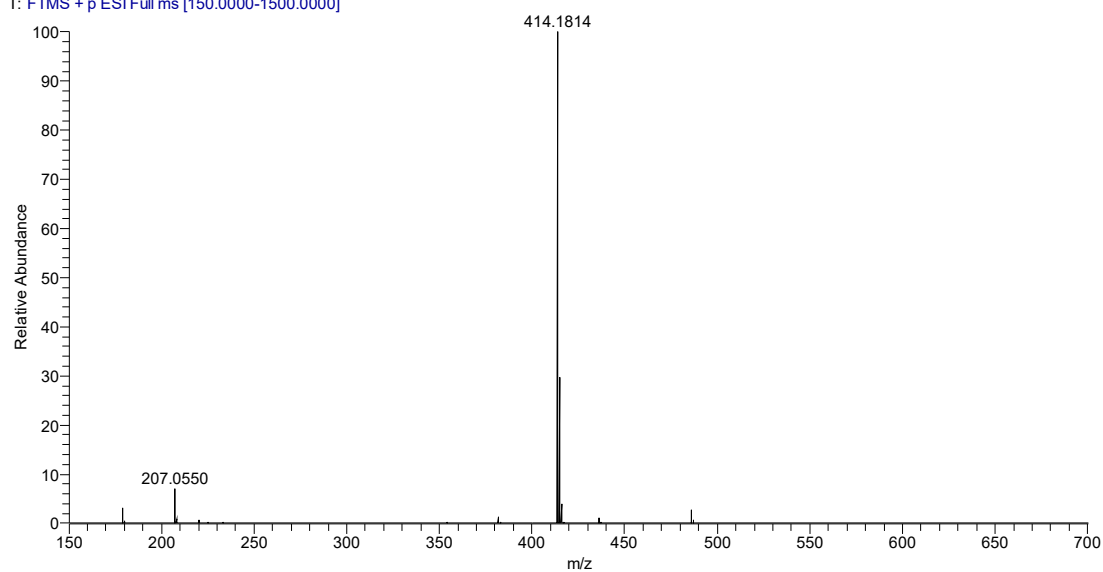

The HRMS spectrogram of compound **E11**

Compound **E12**,  
methyl *N*-(4-ethylphenyl)-*N*-(phenazine-1-carbonyl)alaninate

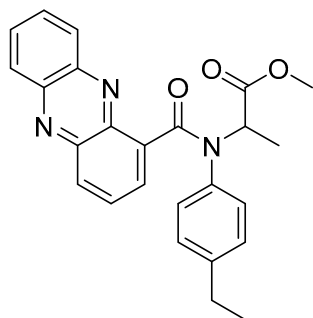

Yellow solid, yield 83.4%, m.p. 136.5-138.3°C;  $^1\text{H}$  NMR (400 MHz,  $\text{DMSO}-d_6$ )  $\delta$  8.32 (s, 1H), 8.22 (d,  $J = 7.8$  Hz, 1H), 8.10 (d,  $J = 10.0$  Hz, 1H), 8.06 – 7.97 (m, 2H), 7.83 – 7.69 (m, 2H), 7.10 (d,  $J = 8.2$  Hz, 2H), 6.75 (d,  $J = 7.9$  Hz, 2H), 5.19 (1H, two isomers), 3.84 (s, 3H), 2.24 (q,  $J = 7.0$  Hz, 2H), 1.50 (3H, two isomers), 0.85 (t,  $J = 7.5$  Hz, 3H).  $^{13}\text{C}$  NMR (101 MHz,  $\text{DMSO}-d_6$ )  $\delta$  168.25, 165.85, 143.21, 142.83, 142.24, 139.93, 138.77, 137.41, 132.03, 130.56, 130.30, 130.00 (2C), 129.72 (2C), 129.61, 128.00 (2C), 116.61, 57.34, 52.65, 27.71, 15.75, 15.38. HRMS (ESI): calcd for  $\text{C}_{25}\text{H}_{23}\text{N}_3\text{O}_3$   $\{[\text{M}+\text{H}]^+\}$ , 414.1813; found, 414.1818.

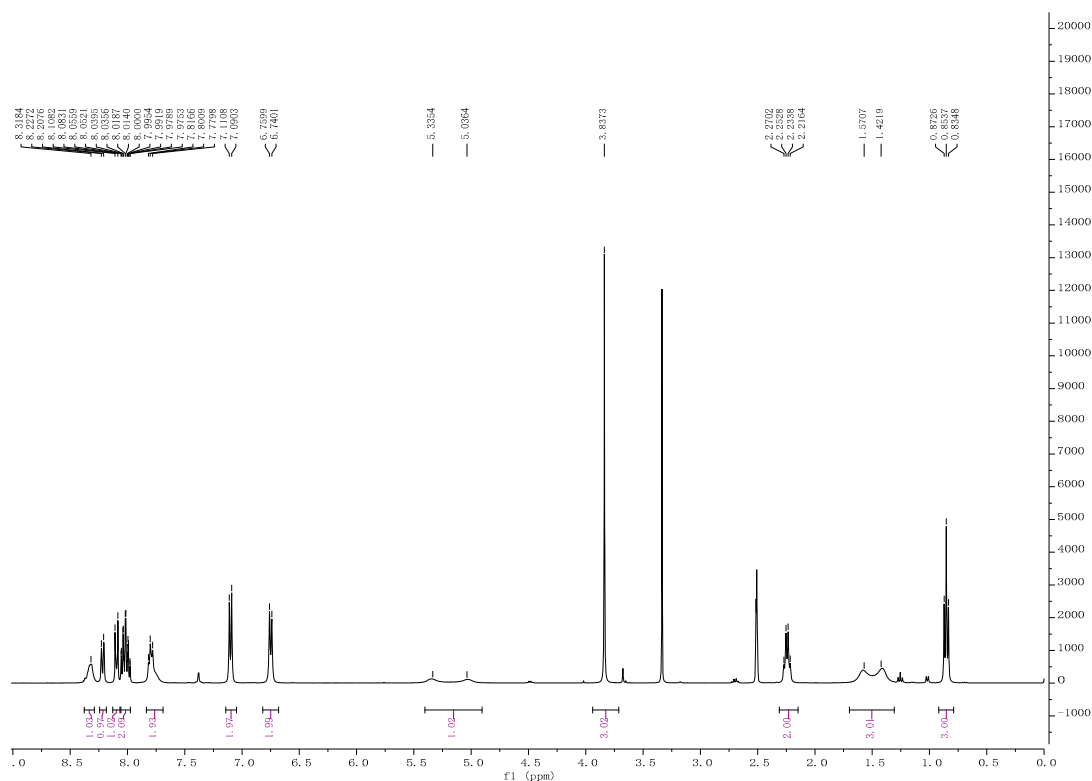

The  $^1\text{H}$  NMR spectrogram of compound **E12**



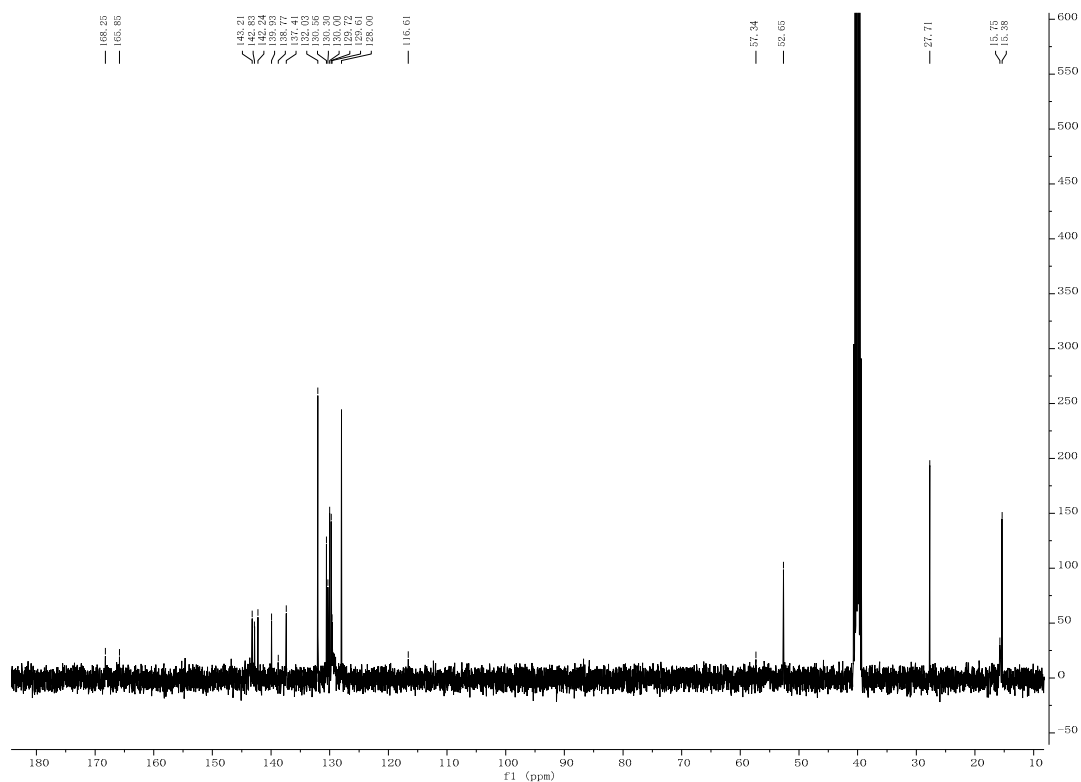

The  $^{13}\text{C}$  NMR spectrogram of compound **E12**

W15

POS\_W15 509 (2.891) AM (Cen,4, 80.00, Ar,10000.0,0.00,0.00)

1: TOF MS ES+  
1.77e6

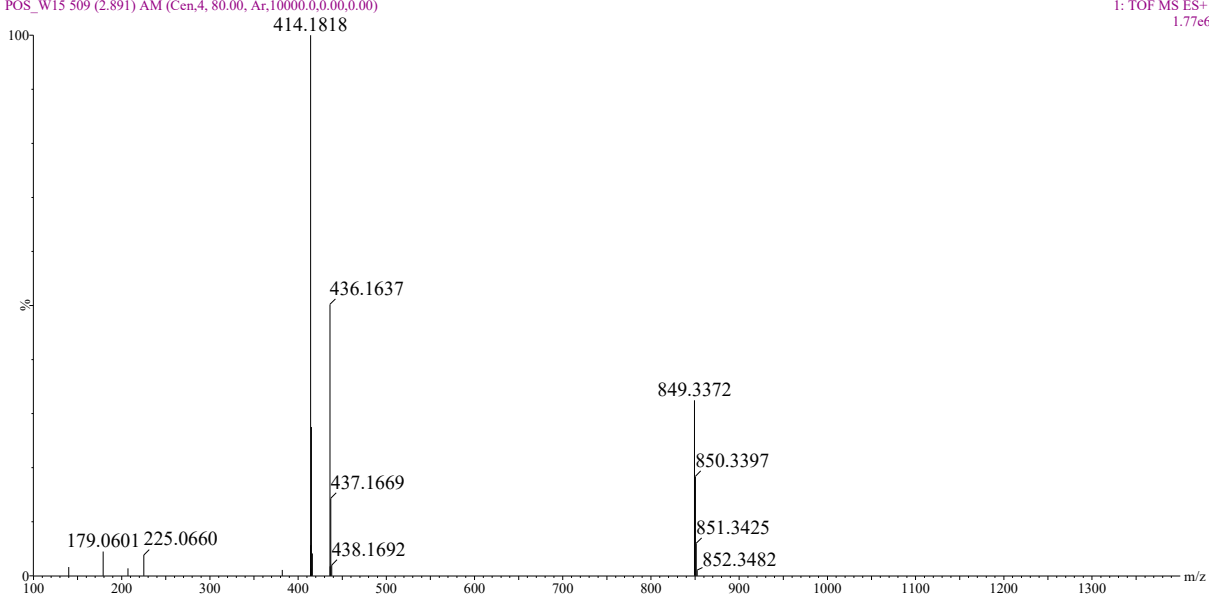

The HRMS spectrogram of compound **E12**

Compound **E13**,  
methyl *N*-(3-isopropylphenyl)-*N*-(phenazine-1-carbonyl)alaninate

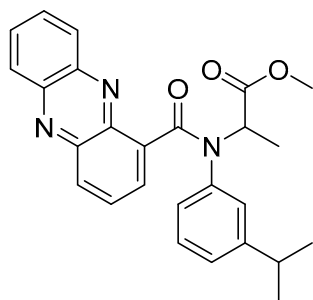

Yellow fluid, yield 83.4%;  $^1\text{H}$  NMR (400 MHz,  $\text{DMSO-}d_6$ )  $\delta$  8.35 (s, 1H), 8.21 (d,  $J$  = 8.4 Hz, 1H), 8.10 – 7.97 (m, 3H), 7.85 – 7.72 (m, 2H), 7.05 – 6.93 (m, 2H), 6.87 (t,  $J$  = 6.5 Hz, 1H), 6.71 (s, 1H), 5.25 (1H, two isomers), 3.84 (s, 3H), 2.34 (p,  $J$  = 7.7, 7.3 Hz, 1H), 1.51 (3H, two isomers), 0.56 (s, 3H), 0.37 (s, 3H).  $^{13}\text{C}$  NMR (101 MHz,  $\text{DMSO-}d_6$ )  $\delta$  172.04, 168.29, 148.69, 143.20, 142.84, 142.19, 139.85, 137.50, 132.00, 130.50, 130.26, 129.92 (2C), 129.68 (2C), 128.57, 127.70, 126.80, 126.40, 126.17, 54.96, 52.65, 32.96, 23.37, 15.85, 14.56. HRMS (ESI): calcd for  $\text{C}_{26}\text{H}_{25}\text{N}_3\text{O}_3$   $\{[\text{M}+\text{H}]^+\}$ , 428.1969; found, 428.1972.

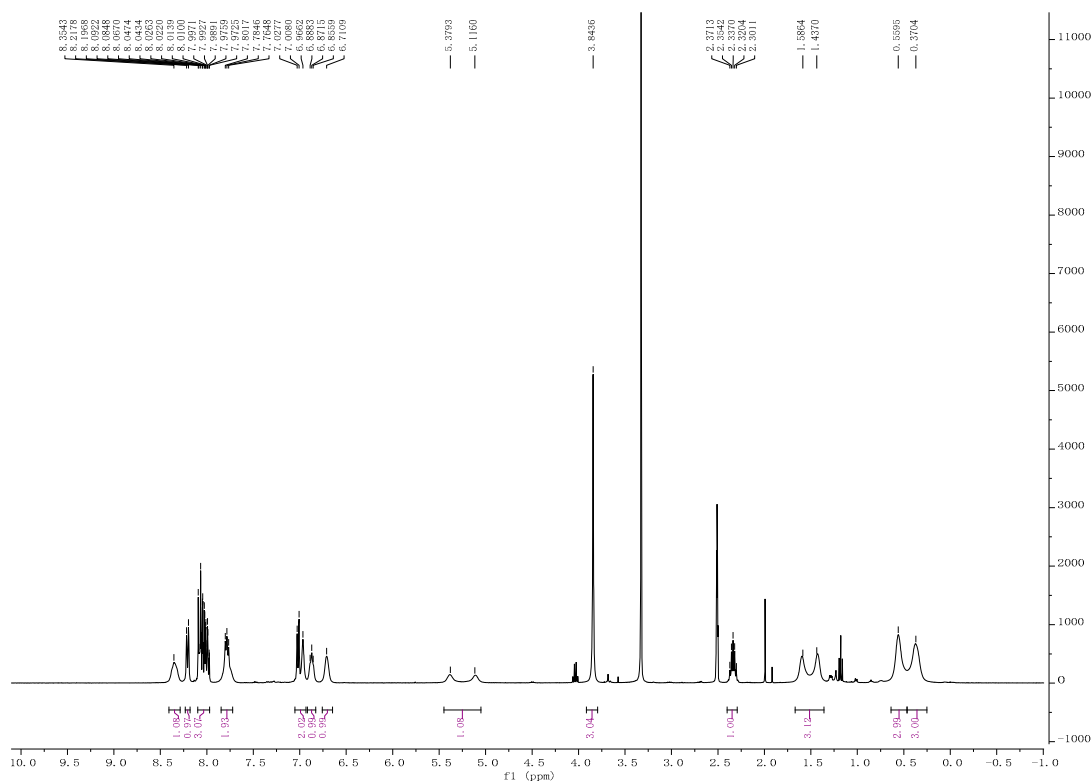

The  $^1\text{H}$  NMR spectrogram of compound **E13**

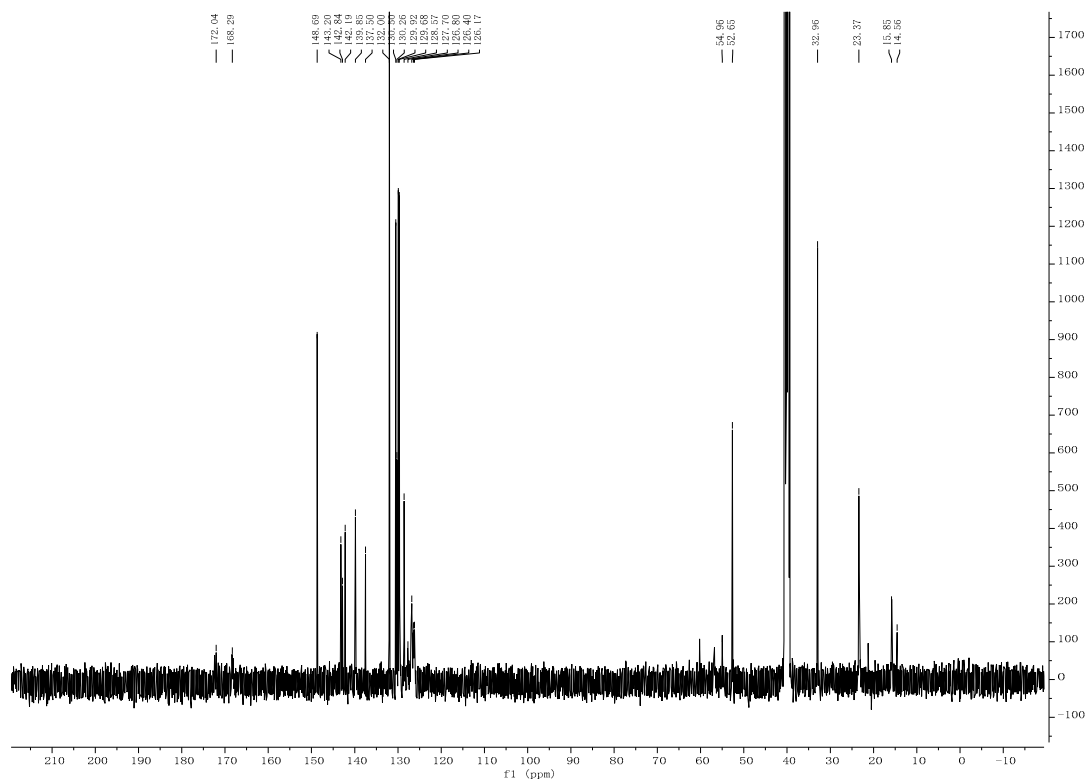

The  $^{13}\text{C}$  NMR spectrogram of compound **E13**

W12 #131 RT: 0.69 AV: 1 NL: 1.99E10  
T: FTMS + p ESI Full ms [150.0000-1500.0000]

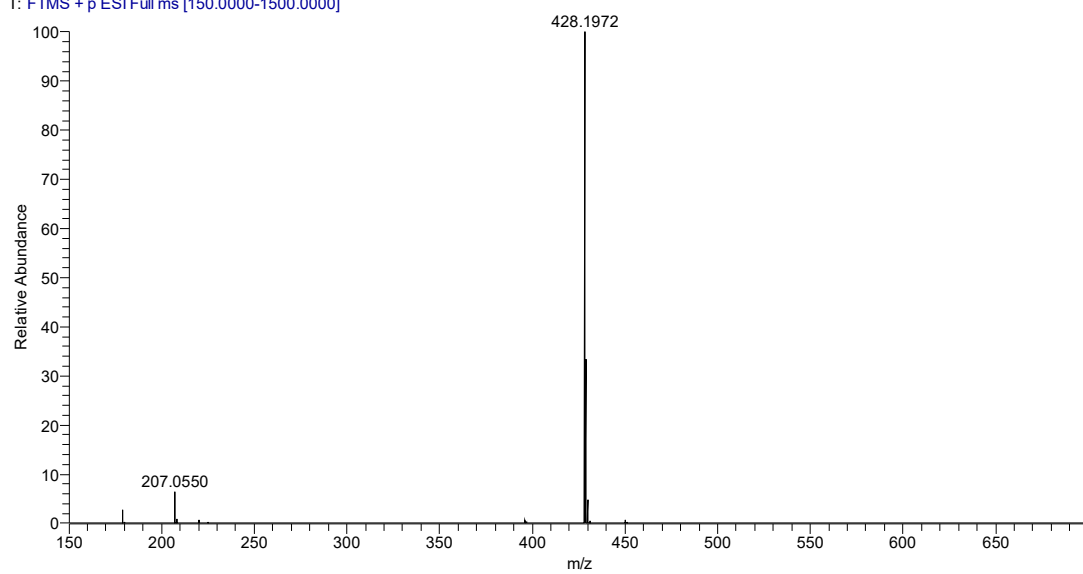

The HRMS spectrogram of compound **E13**

Compound **E14**,  
methyl *N*-(4-isopropylphenyl)-*N*-(phenazine-1-carbonyl)alaninate

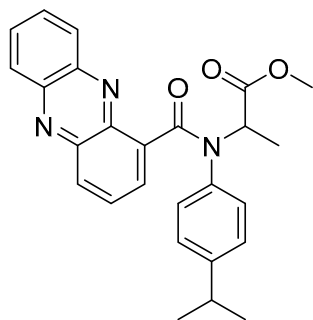

Yellow fluid, yield 82.7%;  $^1\text{H}$  NMR (400 MHz,  $\text{DMSO-}d_6$ )  $\delta$  8.36 – 8.28 (m, 1H), 8.21 (d,  $J = 8.2$  Hz, 1H), 8.12 – 8.06 (m, 1H), 8.01 (dddd,  $J = 16.3, 8.0, 6.6, 1.5$  Hz, 2H), 7.86 – 7.66 (m, 2H), 7.09 (d,  $J = 8.4$  Hz, 2H), 6.77 (d,  $J = 8.1$  Hz, 2H), 5.17 (1H, two isomers), 3.84 (s, 3H), 2.54 (s, 1H), 1.51 (3H, two isomers), 0.85 (d,  $J = 6.9$  Hz, 6H).  $^{13}\text{C}$  NMR (101 MHz,  $\text{DMSO-}d_6$ )  $\delta$  172.26, 168.18, 148.11, 143.17, 142.79, 142.23, 139.93, 137.36, 131.98, 130.51 (2C), 130.30 (3C), 129.98 (2C), 129.68 (2C), 126.44 (2C), 55.34, 52.64, 32.97, 24.31, 23.77, 15.74. HRMS (ESI): calcd for  $\text{C}_{26}\text{H}_{25}\text{N}_3\text{O}_3$   $\{[\text{M}+\text{H}]^+\}$ , 428.1969; found, 428.1971.

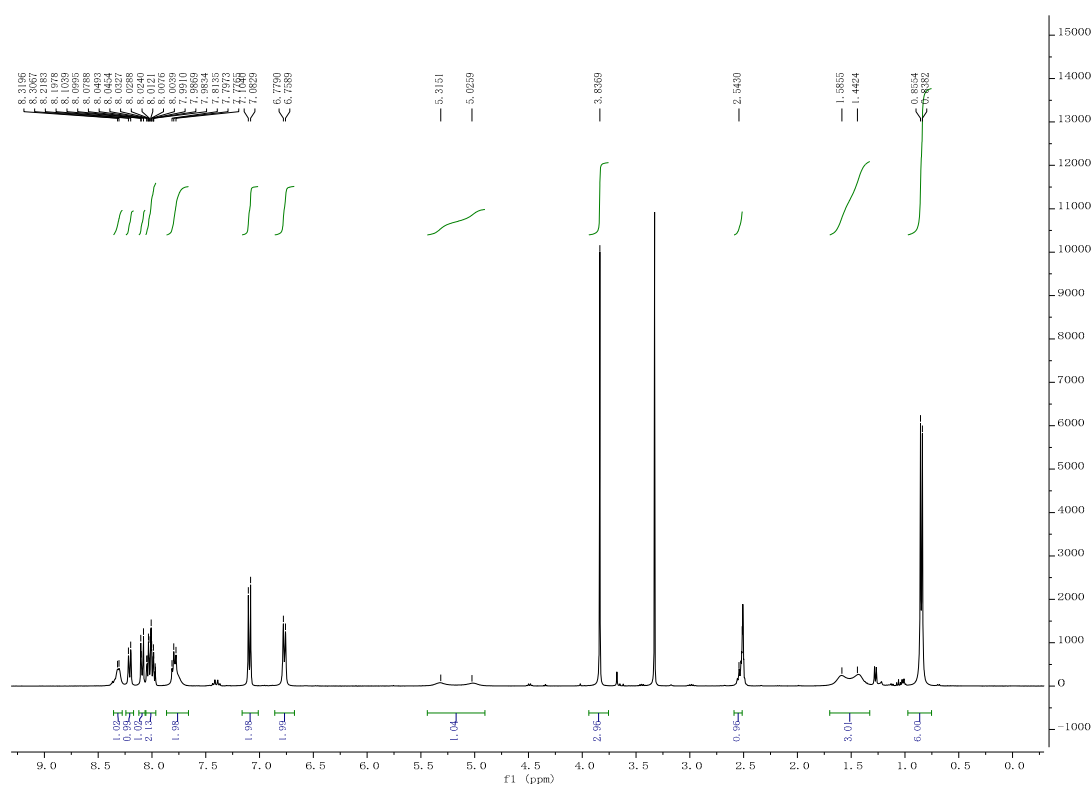

The  $^1\text{H}$  NMR spectrogram of compound **E14**

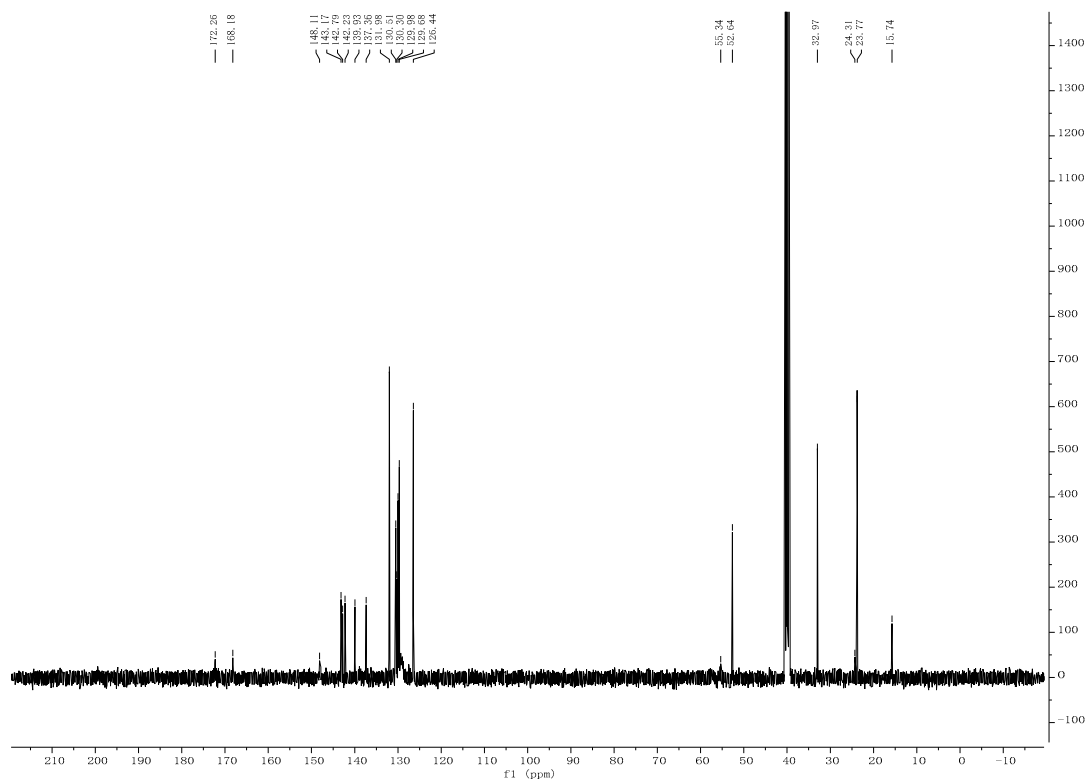

The  $^{13}\text{C}$  NMR spectrogram of compound **E14**

W16

POS\_W16 564 (3.203) AM (Cen,4, 80.00, Ar,10000.0,0.00,0.00); Cm (564:565)

1: TOF MS ES+  
3.14e6

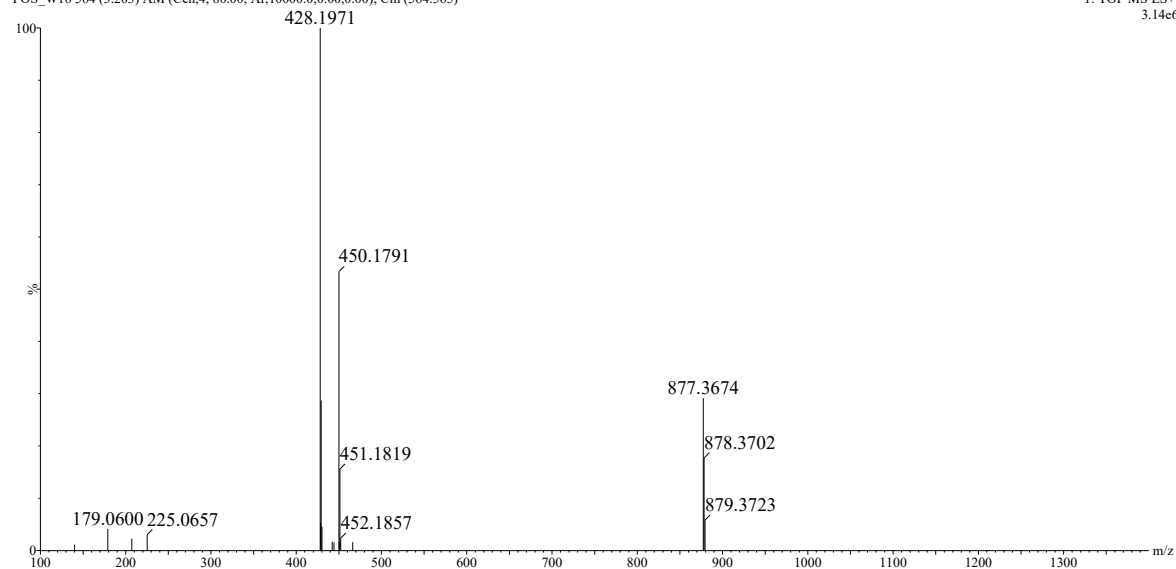

The HRMS spectrogram of compound **E14**

Compound **E15**,  
methyl *N*-(2,6-dimethylphenyl)-*N*-(phenazine-1-carbonyl)alaninate

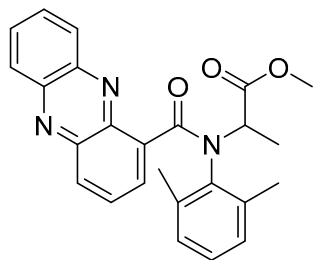

Yellow solid, yield 78.4%, m.p. 150.0-152.0 °C;  $^1\text{H}$  NMR (400 MHz,  $\text{DMSO}-d_6$ )  $\delta$  8.28 – 8.18 (m, 2H), 8.13 – 8.07 (m, 1H), 8.05 – 7.95 (m, 2H), 7.80 (d,  $J = 5.1$  Hz, 2H), 6.75 (s, 3H), 4.75 (1H, two isomers), 3.82 (s, 3H), 2.49 (d,  $J = 9.5$  Hz, 6H), 1.14 (3H, two isomers).  $^{13}\text{C}$  NMR (101 MHz,  $\text{DMSO}-d_6$ )  $\delta$  172.72, 168.97, 143.11, 142.35, 142.26, 140.13, 138.27, 136.67 (2C), 132.11, 132.00, 130.59, 130.24, 129.80 (2C), 129.51 (2C), 128.78, 128.50, 128.40, 56.30, 52.39, 19.44, 19.29, 15.49. HRMS (ESI): calcd for  $\text{C}_{25}\text{H}_{23}\text{N}_3\text{O}_3$   $\{[\text{M}+\text{H}]^+\}$ , 414.1812; found, 414.1812.

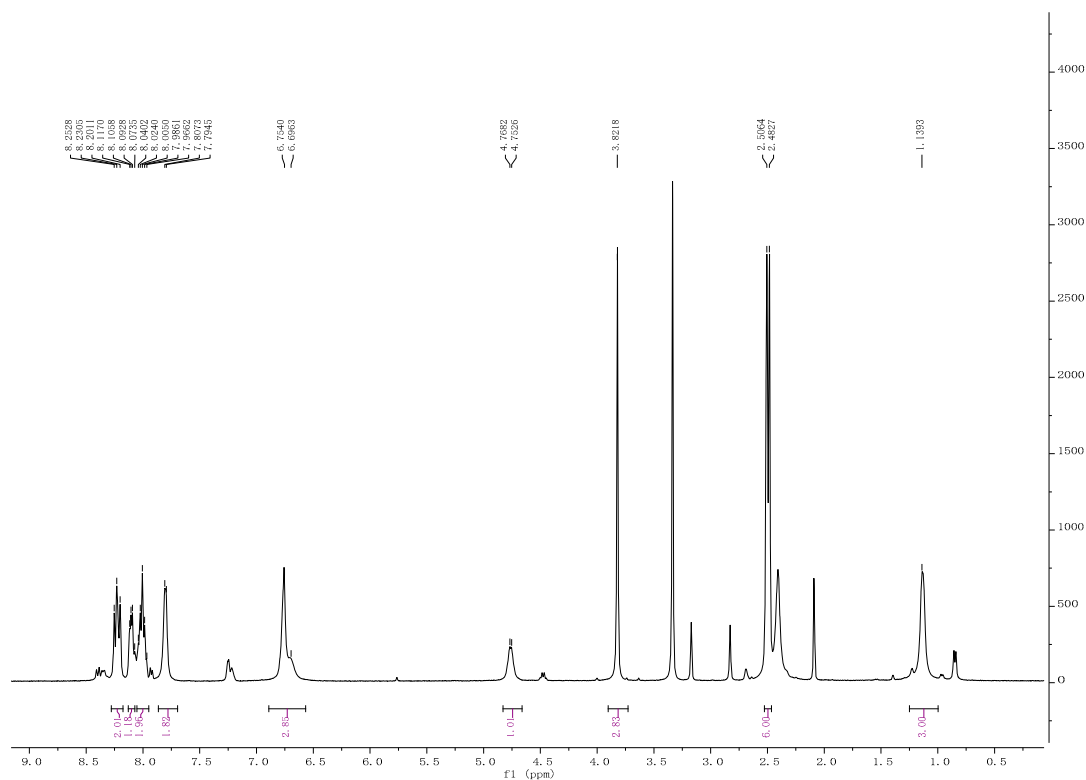

The  $^1\text{H}$  NMR spectrogram of compound **E15**

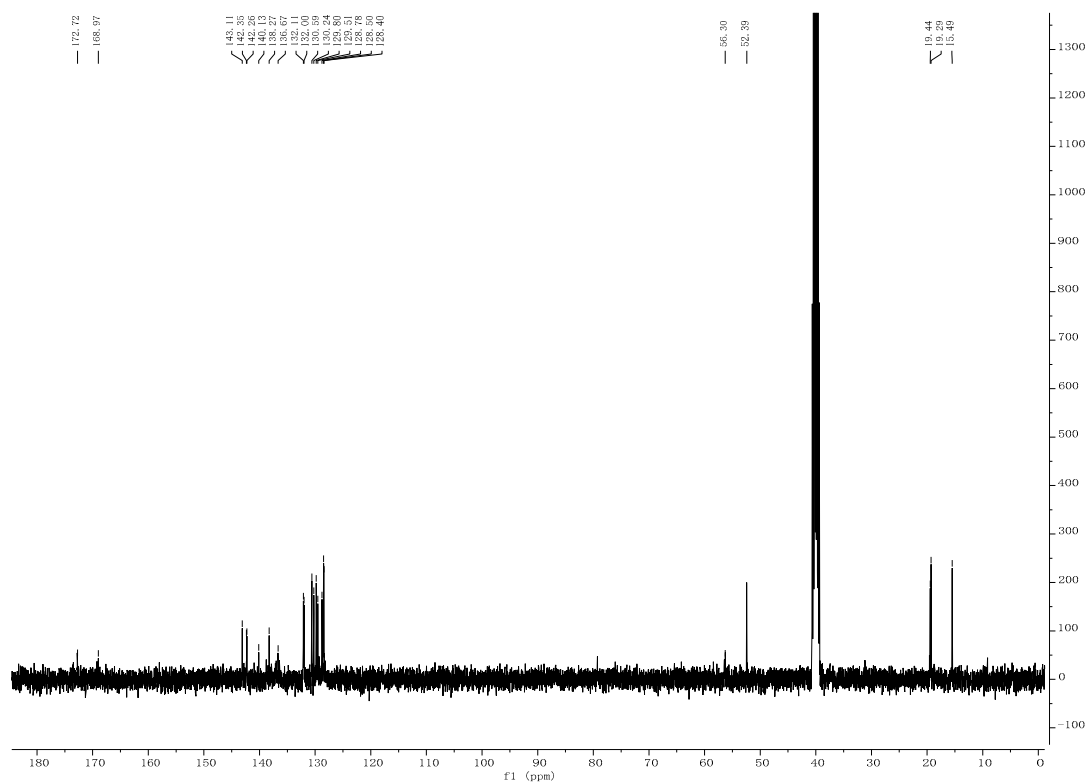

The  $^{13}\text{C}$  NMR spectrogram of compound **E15**

W2 #119 RT: 0.64 AV: 1 NL: 1.57E10  
T: FTMS + p ESI Full ms [150.0000-1500.0000]

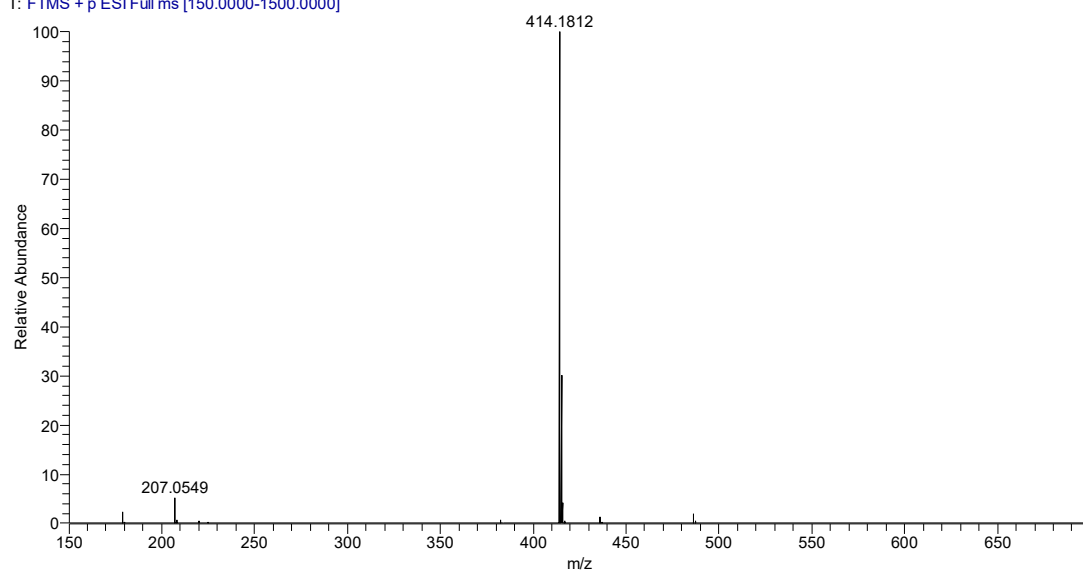

The HRMS spectrogram of compound **E15**

Compound **E16**,  
methyl *N*-(3-nitrophenyl)-*N*-(phenazine-1-carbonyl)alaninate

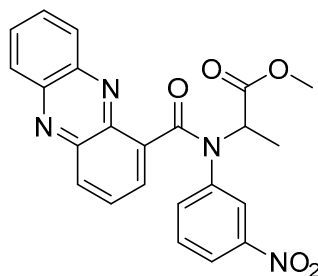

Yellow solid, yield 76.9%, m.p. 166.7-168.4 °C;  $^1\text{H}$  NMR (400 MHz, DMSO- $d_6$ )  $\delta$  8.33 (s, 1H), 8.16 (dd,  $J$  = 18.2, 8.5 Hz, 3H), 8.01 (dt,  $J$  = 19.7, 6.2 Hz, 3H), 7.85 (s, 1H), 7.78 – 7.61 (m, 2H), 7.21 (t,  $J$  = 7.9 Hz, 1H), 5.30 (1H, two isomers), 3.87 (s, 3H), 1.55 (3H, two isomers).  $^{13}\text{C}$  NMR (101 MHz, DMSO- $d_6$ )  $\delta$  172.00, 168.07, 147.24, 143.23, 142.76, 142.10, 139.28, 136.43, 132.18, 131.11, 130.59, 130.03 (2C), 129.86, 129.67, 124.73, 122.79, 112.90 (2C), 108.98, 55.95, 52.85, 15.79. HRMS (ESI): calcd for  $\text{C}_{23}\text{H}_{18}\text{N}_4\text{O}_5$   $\{[\text{M}+\text{H}]^+\}$ , 431.135; found, 431.1354.

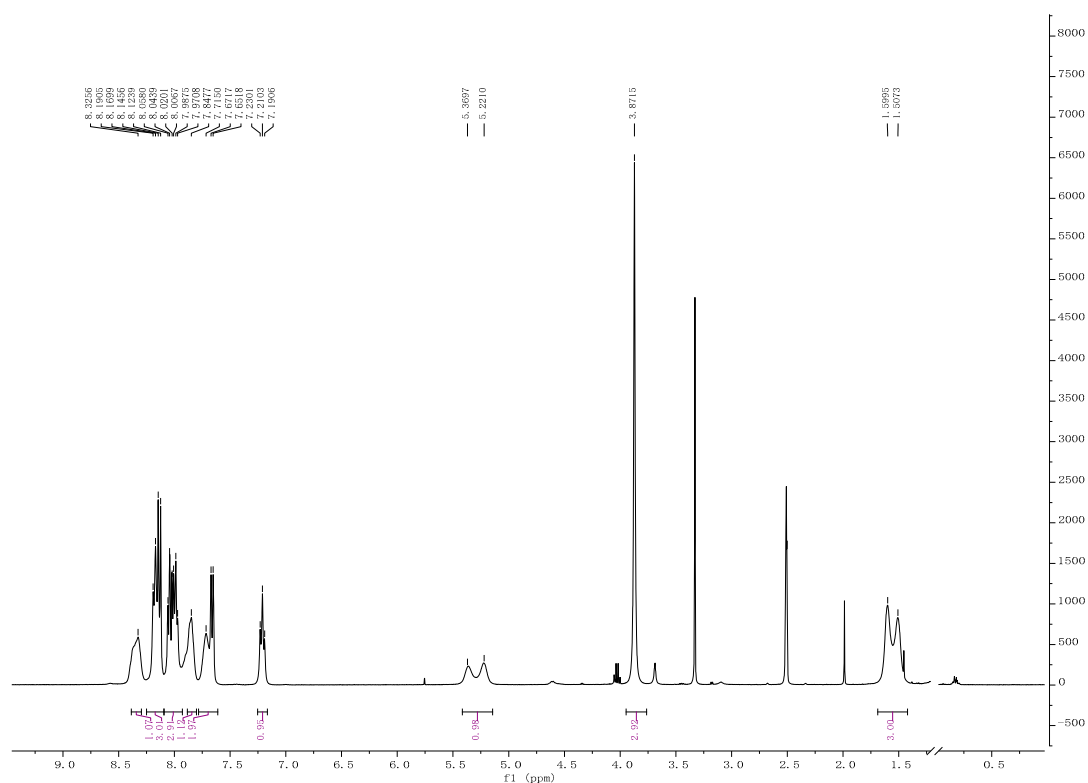

The  $^1\text{H}$  NMR spectrogram of compound **E16**



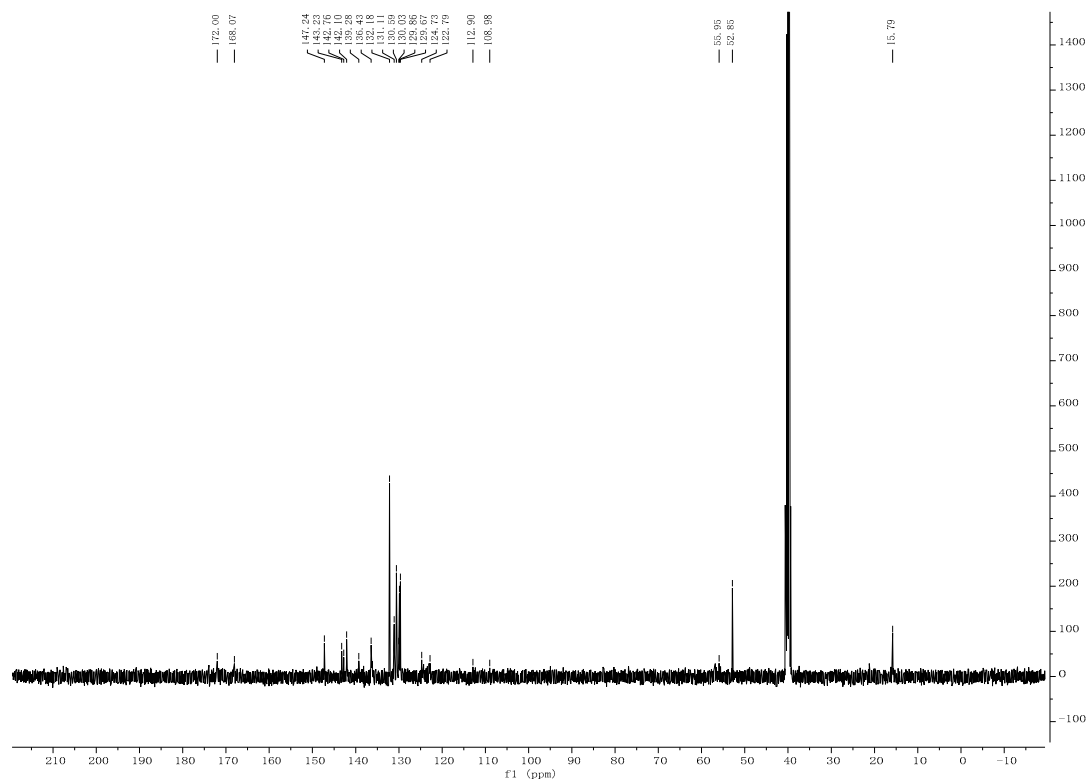

The  $^{13}\text{C}$  NMR spectrogram of compound **E16**

W8 #92 RT: 0.49 AV: 1 NL: 1.40E10  
T: FTMS + p ESI Full ms [150.0000-1500.0000]

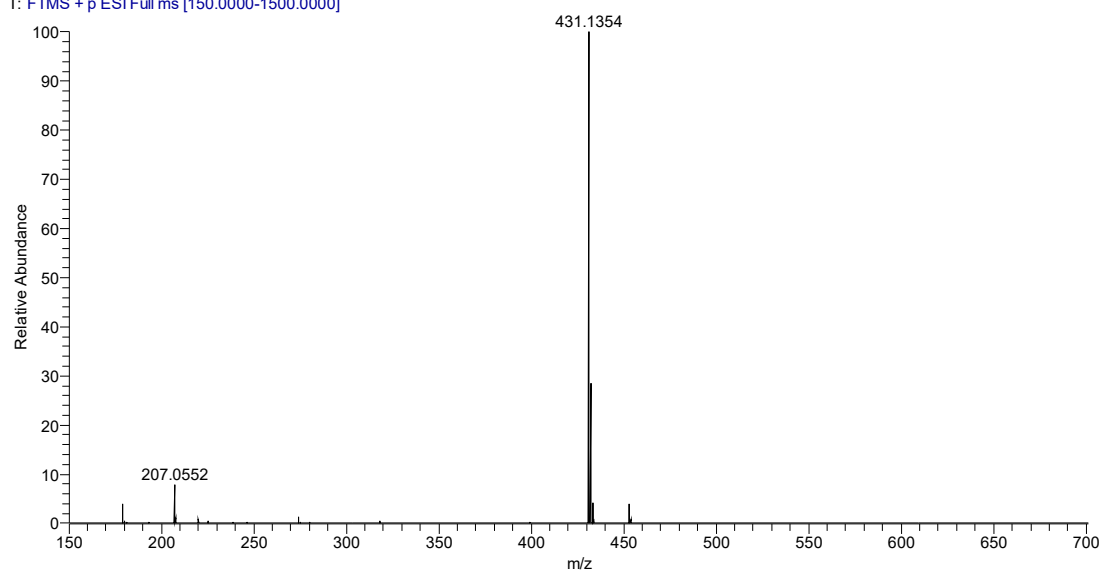

The HRMS spectrogram of compound **E16**
